# 1 **Aromatic polyketide biosynthesis: fidelity, evolution and engineering**

2

3 Zhiwei Qin,<sup>a#</sup> Rebecca Devine,<sup>b#</sup> Matthew I. Hutchings<sup>b\*</sup> and Barrie Wilkinson<sup>a\*</sup>

4

5 <sup>a</sup>Department of Molecular Microbiology, John Innes Centre, Norwich Research Park,  
6 Norwich, NR4 7UH, United Kingdom.

7 <sup>b</sup>School of Biological Sciences, University of East Anglia, Norwich Research Park, Norwich,  
8 NR4 7TJ, United Kingdom.

9 <sup>#</sup>These authors contributed equally to this work.

## 10 **Correspondence**

11 Professor Matt Hutchings, Email: [m.hutchings@uea.ac.uk](mailto:m.hutchings@uea.ac.uk)

12 Professor Barrie Wilkinson, Email: [barrie.wilkinson@jic.ac.uk](mailto:barrie.wilkinson@jic.ac.uk)

13

## 14 **Abstract**

15 We report the formicapiridines which are structurally and biosynthetically related to the  
16 pentacyclic fasamycin and formicamycin aromatic polyketides but comprise a rare pyridine  
17 moiety. These new compounds are trace level metabolites formed by derailment of the major  
18 biosynthetic pathway. Inspired by evolutionary logic we show that rational mutation of a  
19 single gene in the biosynthetic gene cluster leads to a significant increase both in total  
20 formicapiridine production and their enrichment relative to the fasamycins/formicamycins.  
21 Our observations broaden the polyketide biosynthetic landscape and identify a non-catalytic  
22 role for ABM superfamily proteins in type II polyketide synthase assemblages for maintaining  
23 biosynthetic pathway fidelity.

24

## 25 Introduction

26 An idealised linear biosynthetic pathway to a complex natural product can be imagined  
27 proceeding through a series of intermediate structures which would exist for some finite time  
28 as the pathway product accumulates. These hypothetical intermediates would exist freely in  
29 solution or bound to enzymes in the case of assembly line processes, and eventually all flux  
30 through the pathway would end and only the final product would exist. In reality no pathways  
31 proceed in this manner as the situation is complicated by varying rates of reaction for the  
32 different steps, meaning that some intermediates accumulate at significant concentrations,  
33 while the inherent reactivity of other intermediates, or their ability to act as substrates for  
34 housekeeping enzymes not dedicated to the pathway, means that shunt metabolites often  
35 arise. Matters are further complicated by the fact that pathways are often convergent, with  
36 multiple units made in parallel before assembly into the final product, for example in the  
37 biosynthetic pathways to macrolide or aminoglycoside<sup>1</sup> antibiotics. In addition, some  
38 pathways are not linear, and the final product is accessed *via* several routes, due to the  
39 inherent substrate plasticity of the biosynthetic enzymes; well-studied examples include the  
40 rapamycin and erythromycin pathways<sup>2</sup>. Thus, in practice, any biosynthetic pathway will lead  
41 to the accumulation of a mixture comprising the final product plus varying concentrations of  
42 pathway intermediates and shunt metabolites. The composition of such a mixture will vary  
43 further when alternate growth conditions are used<sup>3</sup>. Sometimes the 'final' product of the  
44 pathway cannot even be clearly discerned.

45 Such mixtures of compounds are said to comprise a series of biosynthetic congeners, and  
46 their identification can provide valuable information about a biosynthetic pathway and may  
47 sometimes lead to new biosynthetic understanding<sup>4</sup>. We recently reported the formicamycins,  
48 pentacyclic polyketides produced by *Streptomyces formicae* KY5 isolated from the fungus-  
49 growing plant-ant *Tetraponera penzigi* (Fig. 1).<sup>5</sup> In total, sixteen congeners were isolated  
50 during the initial study, including three new fasamycins, a group of compounds previously  
51 reported from the heterologous expression of a clone derived from environmental DNA<sup>6</sup>. The  
52 fasamycins are likely to be biosynthetic precursors of the formicamycins. These various  
53 congeners are the product of a type II polyketide synthase (PKS) operating in conjunction  
54 with a series of post-PKS modifications that include O-methylation and halogenation, plus  
55 oxidative and reductive modifications. Intrigued by these compounds, which exhibit potent  
56 antibacterial activity, and as part of studies to decipher their biosynthetic pathway, we  
57 employed targeted metabolomics to identify further congeners that may have been missed  
58 during manual analysis of culture extracts. This led us to identify the formicapridines (**1-9**),  
59 pyridine containing polyketide alkaloids which represent additional products of the

60 formicamycin (*for*) biosynthetic gene cluster (BGC). Products of type II PKS systems which  
 61 contain a pyridine moiety are extremely rare<sup>7</sup>.

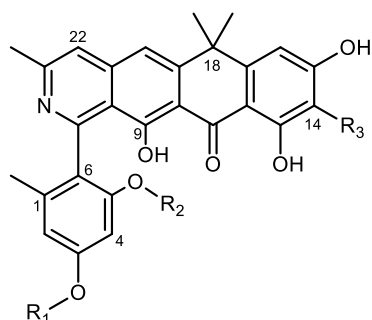

- 1 **Formicapyridine A**  $R_1 = H, R_2 = H, R_3 = H$
- 2 **Formicapyridine B**  $R_1 = CH_3, R_2 = H, R_3 = H$
- 3 **Formicapyridine C**  $R_1 = CH_3, R_2 = CH_3, R_3 = H$
- 4 **Formicapyridine D**  $R_1 = H, R_2 = H, R_3 = Cl$
- 5 **Formicapyridine E**  $R_1 = CH_3, R_2 = H, R_3 = Cl$
- 6 **Formicapyridine F**  $R_1 = CH_3, R_2 = CH_3, R_3 = Cl$
- 7 **Formicapyridine G**  $R_1 = H, R_2 = H, R_3 = Br$
- 8 **Formicapyridine H**  $R_1 = CH_3, R_2 = H, R_3 = Br$
- 9 **Formicapyridine I**  $R_1 = CH_3, R_2 = CH_3, R_3 = Br$

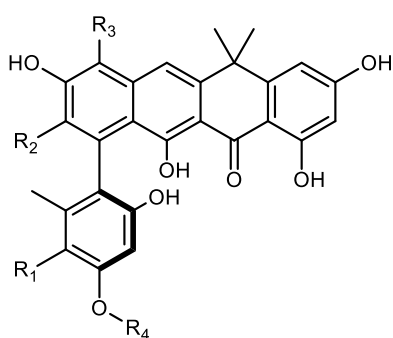

- 10 **Fasamycin C**  $R_1 = H, R_2 = H, R_3 = H, R_4 = CH_3$
- 11 **Fasamycin D**  $R_1 = H, R_2 = H, R_3 = Cl, R_4 = CH_3$
- 12 **Fasamycin E**  $R_1 = Cl, R_2 = H, R_3 = Cl, R_4 = CH_3$
- 13 **Fasamycin F**  $R_1 = H, R_2 = COOH, R_3 = H, R_4 = H$

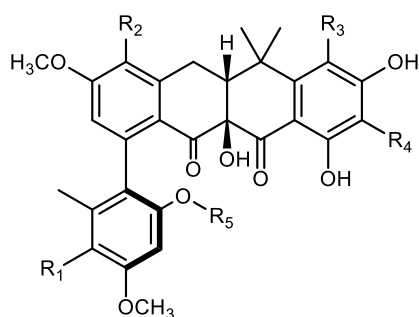

- 14 **Formicamycin A**  $R_1 = H, R_2 = Cl, R_3 = H, R_4 = H, R_5 = CH_3$
- 15 **Formicamycin B**  $R_1 = Cl, R_2 = Cl, R_3 = H, R_4 = H, R_5 = H$
- 16 **Formicamycin C**  $R_1 = H, R_2 = Cl, R_3 = Cl, R_4 = H, R_5 = CH_3$
- 17 **Formicamycin D**  $R_1 = Cl, R_2 = Cl, R_3 = Cl, R_4 = H, R_5 = H$
- 18 **Formicamycin E**  $R_1 = Cl, R_2 = Cl, R_3 = Cl, R_4 = H, R_5 = CH_3$
- 19 **Formicamycin F**  $R_1 = Cl, R_2 = Cl, R_3 = H, R_4 = Cl, R_5 = CH_3$
- 20 **Formicamycin G**  $R_1 = H, R_2 = Cl, R_3 = Cl, R_4 = Cl, R_5 = CH_3$
- 21 **Formicamycin H**  $R_1 = Cl, R_2 = H, R_3 = Cl, R_4 = Cl, R_5 = CH_3$
- 22 **Formicamycin I**  $R_1 = Cl, R_2 = Cl, R_3 = Cl, R_4 = Cl, R_5 = H$
- 23 **Formicamycin J**  $R_1 = Cl, R_2 = Cl, R_3 = Cl, R_4 = Cl, R_5 = CH_3$
- 24 **Formicamycin K**  $R_1 = H, R_2 = Cl, R_3 = Br, R_4 = Cl, R_5 = CH_3$
- 25 **Formicamycin L**  $R_1 = Cl, R_2 = Cl, R_3 = Br, R_4 = Cl, R_5 = CH_3$
- 26 **Formicamycin M**  $R_1 = H, R_2 = Br, R_3 = H, R_4 = H, R_5 = CH_3$

62

63 **Figure 1 | Chemical structures of metabolites isolated from *Streptomyces formicae*.**

64 Compounds **1-9** and **13** were discovered during this study whereas **10-12** and **14-26** were  
 65 reported in an earlier study<sup>5</sup>.

66 Challis and co-workers recently showed that the majority of actinomycete derived polyketide  
 67 alkaloids, including those containing a pyridine moiety, arise from reactive intermediates  
 68 formed after transamination of aldehydes generated from reductive off-loading of the

69 thioester bound polyketide chain from a type I modular PK<sup>8</sup>. In contrast, the formicapyridines  
70 are minor shunt metabolites that likely arise due to derailment of the formicamycin  
71 biosynthetic pathway. Intrigued by these observations we investigated the possibility of  
72 reprogramming, or evolving, the BGC such that the formicapyridines might become the  
73 major products of the formicamycin BGC. Following bioinformatic and mutational analysis we  
74 identified a mutant  $\Delta forS$  which significantly increased the production of formicapyridines  
75 while reducing the combined titre of fasamycins and formicamycins. These and other  
76 mutational data lead us to the hypothesis that ForS is not a cyclase but forms part of a  
77 multienzyme complex where it acts as a chaperone-like protein to aid in maintaining pathway  
78 fidelity and performance. The discovery and engineering of formicapyridine biosynthesis  
79 raises intriguing questions regarding the evolution of type II PKS biosynthetic pathways and  
80 the origins of natural product chemical diversity.

81

## 82 **Results**

83 **Metabolomics led identification of the formicapyridines.** We attempted to identify new  
84 biosynthetic congeners using molecular networking via the Global Natural Product Social  
85 Molecular Networking (GNPS) web-platform<sup>9</sup>. However, the aromatic, polycyclic nature of  
86 these molecules limited fragmentation and the effectiveness of GNPS. Instead, as most  
87 fasamycin and formicamycin congeners are halogenated, we established a bespoke  
88 dereplication method by making use of *S. formicae* KY5 mutants that we reported previously,  
89 including an entire BGC deletion strain ( $\Delta for$ ), and a strain in which the pathway specific  
90 halogenase gene was deleted ( $\Delta forV$ )<sup>5</sup> (Fig. 2). Our earlier study<sup>5</sup> showed that the  $\Delta for$   
91 mutant does not produce any fasamycins or formicamycins, and the  $\Delta forV$  mutant produces  
92 only non-halogenated fasamycin congeners.

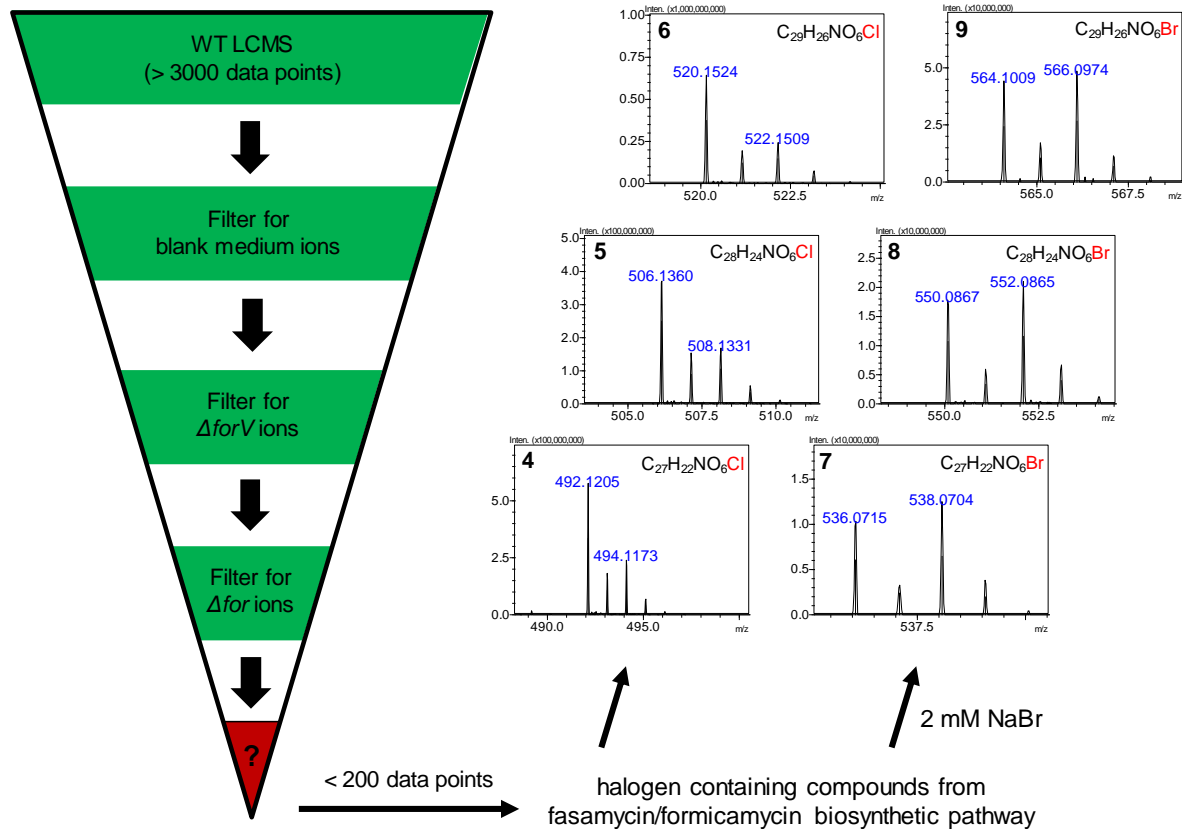

93

94 **Figure 2 | Metabolomics pipeline.** Dereplication, based on *for* biosynthetic mutants and  
95 exogenous bromide addition, led to the identification of the new congeners 4-9 with  
96 characteristic halogen-containing patterns (strain  $\Delta forV$  lacks a halogenase gene;  $\Delta for$  lacks  
97 the entire biosynthetic gene cluster).

98 Replicate (n=3) ethyl acetate extracts of the wild type (WT),  $\Delta for$  and  $\Delta forV$  strains, along  
99 with equivalent extracts from uninoculated mannitol soya flour (MS) agar plates, were  
100 analysed by liquid chromatography high-resolution mass spectroscopy (LC-HRMS). Using  
101 the Profiling Solutions software (Shimadzu Corporation), the WT dataset (Supplementary  
102 Dataset 1) was filtered to remove ions also present in the other samples. Only two other  
103 BGCs in the *S. formicae* KY5 genome<sup>10</sup> contain putative halogenase encoding genes, so we  
104 hypothesised that any chlorine-containing ions present in the filtered dataset would likely  
105 derive from the formicamycin biosynthetic pathway. This process dramatically reduced the  
106 dataset complexity, leaving less than 200 unique ions from an original set of approx. 3000.  
107 Manual curation showed that most of the remaining ions corresponded to halogenated  
108 molecules (based on isotope patterns), leaving twelve previously identified fasamycin and  
109 formicamycin congeners, two new fasamycin/formicamycin congeners that remain  
110 uncharacterized due to trace levels, and the known isoflavone 6-chlorogenistein<sup>11</sup> along with  
111 a regioisomer (Supplementary Note 1). Analysis of C/H ratios and  $m/z$  data allowed us to  
112 identify a group of three additional new metabolites (4-6) with mass spectra suggesting a

113 close structural relationship to the fasamycins/formicamycins; these varied only in the  
114 number of methyl groups present. By searching for equivalent ions lacking chlorine atoms  
115 we identified three additional congeners (**1-3**). Compounds **1-6** were not initially observed in  
116 the UV chromatograms of the WT, and qualitative examination of the LCMS data suggested  
117 titres at least 100-fold lower than for the formicamycins. Furthermore, and surprisingly, the  
118  $m/z$  data implied the presence of a single nitrogen atom.

119 We then repeated the experiment but included a set of WT strain fermentations to which  
120 sodium bromide (2 mM) was added, as our previous study showed this leads to the  
121 biosynthesis of brominated formicamycin congeners<sup>5</sup> This allowed the identification of three  
122 conditional bromine-containing metabolites (**7-9**) with MS characteristics like those of **4-6**  
123 (Fig. 2 and Supplementary Figure 1), lending support to the hypothesis that these  
124 compounds represent a family of biosynthetic congeners.

125 **Isolation, structure elucidation and biological activity.** HRMS data allowed us to predict  
126 molecular formulae for **1-9** that were used to search the online chemical database  
127 REAXYS<sup>12</sup>. This suggested that they represented new structures. To isolate sufficient  
128 material for structure determination and antibacterial assays, the growth of *S. formicae* KY5  
129 was scaled up (14 L; ~450 MS agar plates). After nine days incubation at 30°C the combined  
130 agar was chopped up, extracted with ethyl acetate, and the solvent removed under reduced  
131 pressure. The resulting extract was subjected to repeated rounds of reversed-phase HPLC  
132 followed by Sephadex LH-20 size exclusion chromatography. In this way, small quantities of  
133 purified **1-6** were isolated.

134 We first determined the structure of **2** which was isolated in the largest amount (~2 mg).  
135 HRMS and <sup>13</sup>C NMR data indicated a probable molecular formula of C<sub>28</sub>H<sub>25</sub>NO<sub>6</sub> (calculated  
136  $m/z$  472.1755 ([M+H]<sup>+</sup>); observed  $m/z$  472.1753 ([M+H]<sup>+</sup>);  $\Delta$  = -0.42 ppm) indicating 17  
137 degrees of unsaturation. The UV spectrum showed absorption maxima at 229, 249, 272 and  
138 392 nm indicating a complex conjugated system that was somewhat different to that of the  
139 fasamycins and formicamycins.<sup>5</sup> Inspection of the <sup>13</sup>C NMR spectrum showed 21 sp<sup>2</sup>  
140 carbons ( $\delta_c$  99.90–167.54 ppm), one carbonyl carbon ( $\delta_c$  191.81 ppm), four methyl carbons  
141 ( $\delta_c$  20.41, 23.59, 34.56 and 37.75 ppm), one methoxy carbon ( $\delta_c$  55.80 ppm) and one sp<sup>3</sup>  
142 quaternary carbon ( $\delta_c$  40.49 ppm). The <sup>1</sup>H NMR spectrum revealed the presence of five  
143 methyl singlets ( $\delta_H$  1.75, 1.76, 1.93, 3.67 and 3.81 ppm), two aromatic proton singlets ( $\delta_H$   
144 7.62 and 7.65 ppm), plus four aromatic proton doublets ( $\delta_H$  6.24 (d, 2.25 Hz), 6.70 (d, 2.25  
145 Hz), 6.34 (d, 2.27 Hz) and 6.42 (d, 2.27 Hz)). Limited <sup>1</sup>H-<sup>1</sup>H COSY correlations meant we  
146 were reliant upon HMBC-based atomic connections, and through-space NOESY correlations,  
147 which led to two potential substructures consisting of 26 carbon atoms, leaving one carbonyl

148 and one phenol carbon unassigned (Fig. 3). This left some uncertainty, but given the  
149 relationship with the fasamycins, we predicted the structure to be that shown for **2**. We thus  
150 plotted the  $^{13}\text{C}$  chemical shifts for **2** against those for fasamycin C (**10**), the closest structural  
151 congener, and then all other congeners. The data were in excellent agreement with the main  
152 differences at C7, C22 and C23, consistent with the adjacent nitrogen atom (Supplementary  
153 Figure 2). With the structure of **2** in hand we could readily assign the structures of **1** and **3-6**  
154 (Supplementary Note 2). NOESY correlations played a key role allowing us to link the  
155 methoxy group at C3 with H2 and H4 (e.g. **2**, **3**, **5** and **6**), and the methoxy at C5 with H4  
156 (e.g. **3** and **6**). We also used NOESY and HSQC correlations to distinguish C14 and C16  
157 once one was chlorinated: given the NOESY correlations to the *gem*-dimethyl groups of C26  
158 and C27 with H16, and the disappearance of a HSQC linkage for C14, we concluded that  
159 C14 was chlorinated (e.g. **4-6**). Compounds **1-6** exhibit optical activity with small  $[\alpha]_D^{20}$  values  
160 between  $+8^\circ$  and  $+13^\circ$ , indicating a preferred conformation about the chiral axis of the C6-  
161 C7 bond. However, we were unable to assign the stereochemistry due to the small amounts  
162 of compound and very weak electronic circular dichroism (ECD) spectra. Due to the very low  
163 levels of production, we have assigned preliminary structures for **7-9** based on **4-6**, with a  
164 bromine atom replacing chlorine at C14.

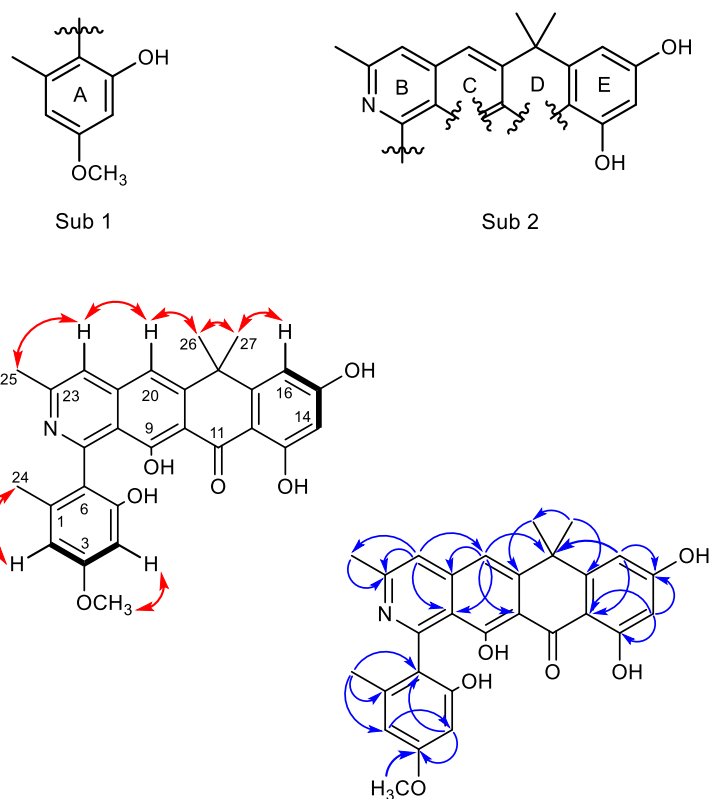

165

166 **Figure 3 | Structure determination.** The COSY (black bold), NOSEY (red double head  
167 arrows) and HMBC (blue single headed arrows) correlations for formicapiridine B (**2**), along  
168 with the two resulting substructures are shown (Sub 1 and Sub 2).

169 Compounds **1-6** displayed no antibacterial activity against *Bacillus subtilis* 168<sup>13</sup> using  
170 overlay assays at 5 µg/mL, the average concentration used for illustrating fasamycin and  
171 formicamycin bioactivity. Similarly, no inhibition was seen at ten-fold this concentration (50  
172 µg/mL), with only small zones of inhibition at 100-fold (500 µg/mL). To confirm this was not a  
173 result of reduced diffusion from the disc, assays were set up to test growth of *B. subtilis* in  
174 liquid cultures containing compounds **1-6**. Again, no significant reduction in colony forming  
175 units (CFU/mL) was seen.

176 **Biosynthetic origins.** Interrogation of LC-HRMS data from extracts of the  $\Delta for$  and  $\Delta forV$   
177 mutants verified that the fasamycin/formicamycin biosynthetic machinery is required for  
178 formicapiridine production. The  $\Delta for$  mutant does not produce **1-6** (Supplementary Figure  
179 3b), but the production of all six compounds was restored upon ectopic expression of the P1-  
180 derived artificial chromosome (PAC) pESAC13-215-G, which contains the entire  
181 formicamycin BGC (Supplementary Figure 3c). Similarly, the  $\Delta forV$  mutant does not produce  
182 **4-6** (Supplementary Figure 3d), but their production is re-established upon ectopic  
183 expression of *forV* under the control of the native promoter using an integrative plasmid  
184 (Supplementary Figure 3e) (the construction of all strains, the requirement of the *for* BGC for  
185 production of the fasamycins and formicamycins, and the requirement of ForV for their  
186 halogenation were described previously<sup>5</sup>.)

187 The very low level of formicapiridines made by the WT strain suggests they are shunt  
188 metabolites arising from aberrant derailment of fasamycin/formicamycin biosynthesis. On  
189 this basis, we suggest a biosynthetic pathway as described in Fig. 4. Assembly of the poly- $\beta$ -  
190 ketone tridecaketide intermediate should proceed as previously proposed on route to the  
191 fasamycins<sup>5</sup>. This would be followed by a series of cyclization and aromatisation steps,  
192 presumably in a sequential manner, with the final cyclization event probably involving  
193 formation of the B-ring. However, premature hydrolysis of the acylcarrier protein from  
194 putative intermediate **27**, prior to the action of a final cyclase, would liberate the enzyme-free,  
195  $\beta$ -ketoacid species **28** that would be highly facile to spontaneous decarboxylation yielding  
196 the methylketone **29**. An endogenous aminotransferase from the cellular milieu would then  
197 generate either of the species **30** or **31**, which could undergo cyclization, dehydration and  
198 oxidation to yield formicapiridine **1**.



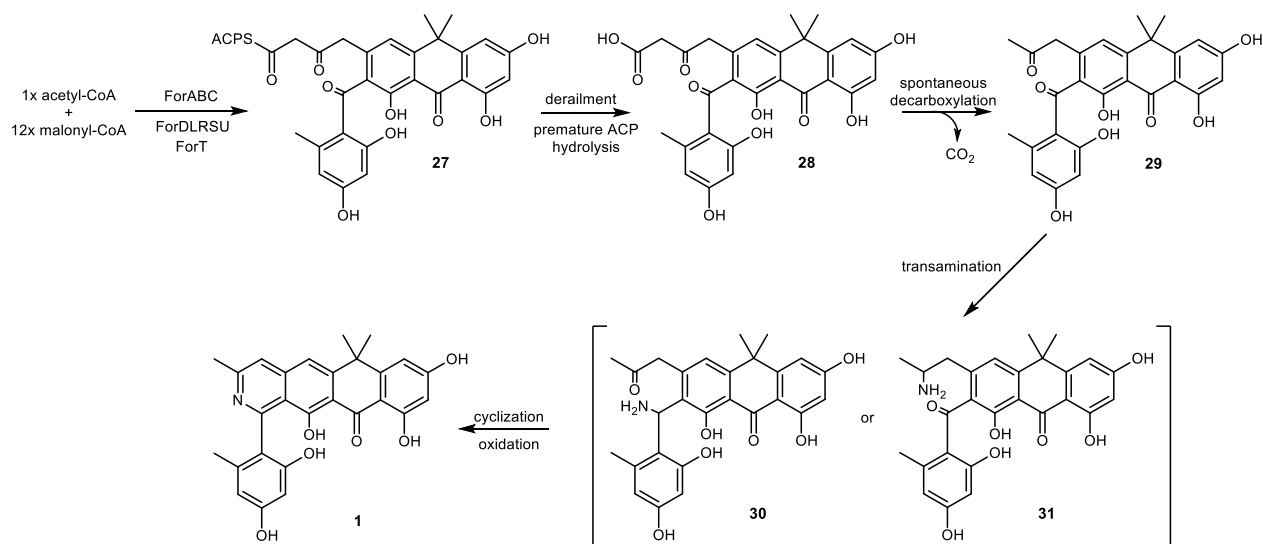

199  
200

#### 201 **Figure 4 | Proposed biosynthesis of the formicapyridine backbone.**

202 This pathway requires that C25 of the formicapyridines originates from C2 of an acetate unit,  
203 with C1 lost via decarboxylation. To support our hypothesis, and the backbone structural  
204 assignments, *S. formicae* KY5 was cultivated on MS agar plates for two days and then  
205 overlaid with a solution of [1,2-<sup>13</sup>C<sub>2</sub>] sodium acetate (1 mL of 60 mM solution; final  
206 concentration 2 mM). This was repeated on the four following days, and after a total of 9  
207 days incubation the agar was extracted with ethyl acetate and the most abundant congener  
208 was isolated (**2**, ~1 mg), and the <sup>13</sup>C NMR spectrum was acquired. Due to the small amount  
209 of material, and overlapping signals, only eight of the intact acetate units could be  
210 unambiguously identified based on their coupling constants in addition to an enriched singlet  
211 for C25 (Fig. 5; Supplementary Figure 4). This is consistent with our biosynthetic hypothesis  
212 which requires that the carbon atom at C25 derives from C2 of a fragmented acetate unit.  
213 The data were in accordance with the proposed structure for **2**.

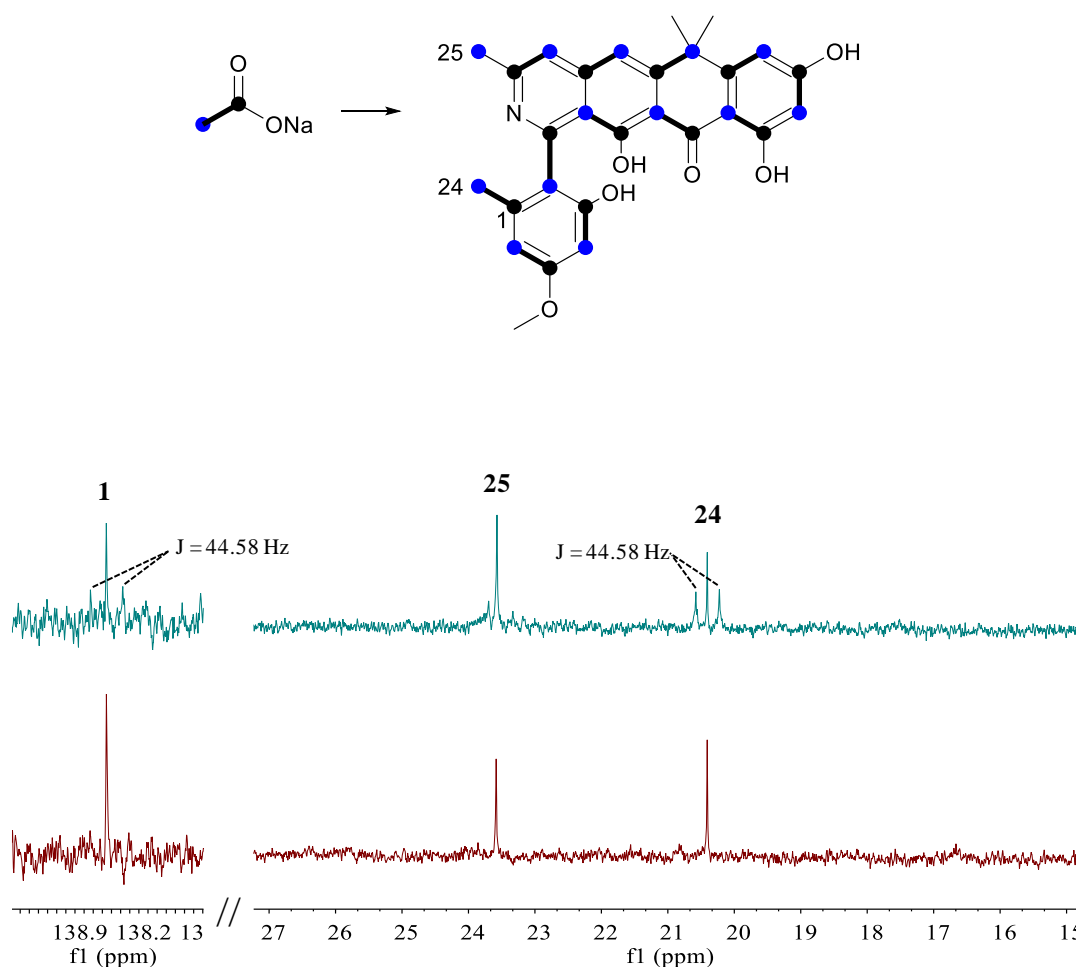

214

215 **Figure 5 | The methyl group carbon C25 arises from C2 of acetate.** Comparison of  $^{13}\text{C}$   
216 NMR spectra for 2 isolated after growth in the presence of  $[1,2-^{13}\text{C}_2]$  sodium acetate.  
217 Integration of the signal for C25 confirmed enrichment of the  $^{13}\text{C}$  isotope and the absence of  
218 coupling to any adjacent carbon atom. In contrast, the methyl group atom C24 shows  
219 enrichment and coupling to C1. The C2 atom of  $[1,2-^{13}\text{C}_2]$  sodium acetate is highlighted as a  
220 blue circle, the C1 atom as a black circle, and the coupled unit by a bold line.

221 **Targeted evolution of the for BGC.** The biosynthetic proposal above led us to the following  
222 thought experiment. Suppose, in some environmental scenario, the presence of  
223 formicapyridines leads to a selection advantage. Is there then a single mutation in the BGC  
224 that could rapidly lead to significantly enhanced levels of their production, and, in addition,  
225 could such changes lead to the reduction or even abolition of fasamycin/formicamycin  
226 biosynthesis?

227 The proposed fasamycin biosynthetic pathway likely requires the action of multiple  
228 polyketide cyclase/aromatase enzymes and this suggests that one cyclase could be  
229 dedicated to formation of ring-B in the final step of backbone biosynthesis (Fig. 4). On this  
230 basis we hypothesised that mutation of a gene encoding a putative ring-B cyclase might lead

231 to the phenotype imagined in our thought experiment by eliminating the biosynthesis of  
232 fasamycins/formicamycins and shunting carbon flux into the proposed formicapyridine  
233 pathway. As described below, bioinformatics (BLAST and conserved domain analysis), in  
234 conjunction with structural modelling using the Phyre2 web portal for protein modelling and  
235 analysis<sup>14</sup>, allowed us to identify five genes in the *for* BGC which might encode potential  
236 cyclase/aromatase enzymes (Table 1).

| Name | Sequence identity | Top BLASTp hit | Annotation                                                                      | % coverage | % identity |
|------|-------------------|----------------|---------------------------------------------------------------------------------|------------|------------|
| ForD | WP_098245758.1    | WP_003962252.1 | Polyketide cyclase ( <i>TcmN</i> ), <i>Streptomyces clavuligerus</i> ATCC 27064 | 95         | 73         |
| ForL | WP_055544278.1    | WP_076971949.1 | <i>TcmI</i> family type II polyketide cyclase, <i>Streptomyces sparsogenes</i>  | 97         | 52         |
| ForR | WP_098245762.1    | AUI41024.1     | Polyketide WhiE II <i>Streptomyces</i> sp., cupin domain                        | 96         | 75         |
| ForS | WP_098245763      | SDF47214.1     | Antibiotic biosynthesis monooxygenase, <i>Lechevalieria fradiae</i>             | 96         | 48         |
| ForU | WP_098245765.1    | PZS28546.1     | Antibiotic biosynthesis monooxygenase, <i>Pseudonocardiales</i> bacteria        | 84         | 46         |

237 **Table 1 | Characteristics of the putative PKS cyclase genes in the *for* BGC.**

238 The gene product ForD shows significant sequence similarity to aromatase/cyclases  
239 (ARO/CYC) such as the N-terminal domain (pfam 03364) of the archetypical tetracenomycin  
240 polyketide cyclase TcmN which belongs to the Bet v1-like superfamily (cl10022)<sup>15</sup>. Extensive  
241 *in vivo* analysis<sup>16, 17, 18</sup> and *in vitro* reconstruction<sup>19</sup> showed that TcmN catalyses formation of  
242 the first two rings of tetracenomycin *via* sequential C9-C14 and C7-C16  
243 cyclization/aromatization reactions. Thus, we predict ForD will play a key role in formation of  
244 the rings E and D during fasamycin biosynthesis. The ForL gene product belongs to the  
245 TcmI family of polyketide cyclases (cl24023; pfam 04673). The function of TcmI has also  
246 been verified by *in vivo* mutational analysis<sup>20</sup> and biochemical characterisation<sup>21, 22</sup>. It  
247 catalyses cyclization of the final ring during formation of tetracenomycin F1 from  
248 tetracenomycin F2, and this reaction is remarkably like that proposed in our hypothesis for  
249 the formation of ring-B as the final step of fasamycin backbone assembly (Fig. 4). ForR is a  
250 homologue of the zinc containing polyketide cyclase RemF from the resistomycin BGC<sup>23, 24</sup>.  
251 RemF is a single domain protein (pfam 07883) comprising the conserved barrel domain of  
252 the cupin superfamily (cl21464)<sup>25</sup>. Finally, the gene products ForS and ForU are both single  
253 domain proteins (pfam 03992) belonging to the ABM superfamily (cl10022). A notable  
254 member of this family is ActVA-orf6 which functions as a monooxygenase during  
255 biosynthesis of the polyketide antibiotic actinorhodin; the structure of this enzyme has been  
256 solved and it is topologically related to the PKS cyclase TcmI and homologues<sup>26</sup>. Notably,  
257 ABM family domains are found in several PKS cyclases including the C-terminal domain of

258 BenH from the benastatin BGC<sup>27, 28</sup>, which also comprises an N-terminal TcmN like cyclase  
259 domain (pfam 03364); and WhiE Protein 1 and other members of the SchA/CurD-like family  
260 of PKS enzymes commonly associated with BGCs for the biosynthesis of spore pigments in  
261 *Streptomyces* spp<sup>29, 30, 31</sup>. SchA/CurD- and WhiE Protein 1-like enzymes are comprised of an  
262 N-terminal ABM domain and a C-terminal PKS cyclase domain (pfam 00486; superfamily  
263 cl24023).

264 To interrogate their roles, we used Cas9-mediated genome editing<sup>32</sup> to make in-frame  
265 deletions in each of these five putative cyclase genes (*forD*, *forL*, *forR*, *forS* and *forU*). Three  
266 independent mutants generated from each gene deletion experiment, along with the WT  
267 strain, were grown on MS agar and cultured at 30°C for nine days. To assess differences in  
268 secondary metabolite production the ethyl acetate extracts from each culture were subjected  
269 to HPLC(UV) and LCMS analysis (Supplementary Dataset 2). The metabolic profiles showed  
270 that the  $\Delta forD$ ,  $\Delta forL$ ,  $\Delta forR$  and  $\Delta forU$  mutants lost the ability to produce formicapyridines,  
271 fasamycins and formicamycins (Supplementary Figures 5-9 respectively), and no new shunt  
272 metabolites could be identified despite rigorous interrogation of the LCMS and LC(UV) data.  
273 These deletions could be rescued by complementation with the deleted gene under control  
274 of either the native promoter ( $\Delta forD/forD$  and  $\Delta forL/forL$ ) or the constitutive *ermE*\* promoter  
275 ( $\Delta forR/forR$ ), although the titres did not reach that of the WT strain in all cases. For the  $\Delta forU$   
276 mutant complementation with *forU* restored production of the non-halogenated congener **10**  
277 only, indicating a polar effect on the downstream halogenase *forV* gene. Subsequent  
278 complementation with a *forUV* cassette under the *ermE*\* promoter in which the two genes  
279 were transcriptionally fused led to the production of halogenated fasamycin and  
280 formicamycin congeners.

281

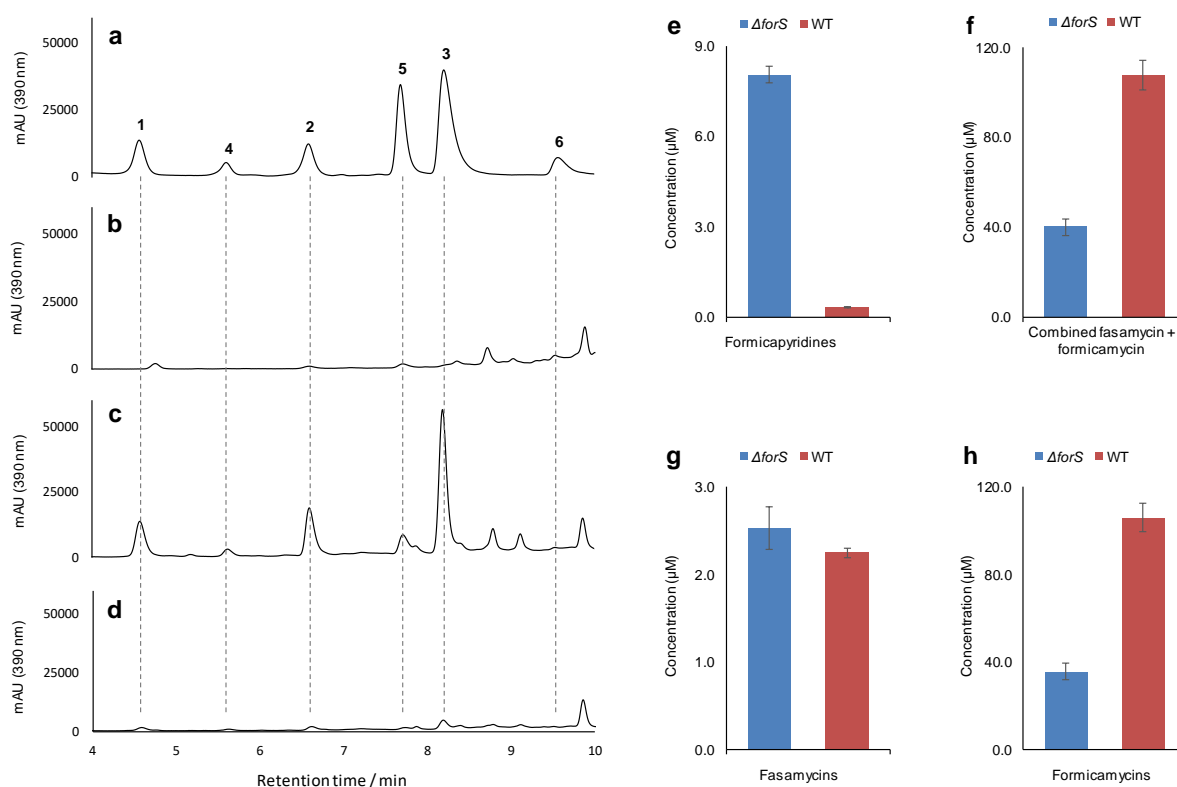

282

283 **Figure 6 | Mutational analysis of *forS*.** Reconstituted HPLC chromatograms (UV; 390 nm)  
284 showing: (a) formicapyridine standards 1-6; (b) *S. formicae* WT extract; (c) *S. formicae*  $\Delta forS$   
285 extract; (d) *S. formicae*  $\Delta forS/forS$  extract. Quantitative data for the combined titre of each  
286 metabolite family produced by the *S. formicae* WT and  $\Delta forS$  mutants are shown for: (e) total  
287 formicapyridines; (f) combined total fasamycins and formicamycins; (g) total fasamycins; (h)  
288 total formicamycins (mean  $\pm$  standard deviation; n = 3).

289 In contrast, production of formicapyridines was increased approx. 25-fold in the  $\Delta forS$  mutant  
290 when compared to the WT (Fig. 6). These effects were complemented by ectopic expression  
291 of *forS* under the control of the *ermE\** promoter. Moreover, the  $\Delta forS$  mutant was  
292 significantly compromised in its ability to produce formicamycins, with their titre being  
293 reduced to approximately one third that of the WT strain. This result is consistent with our  
294 hypothesis for formicapyridine biosynthesis and suggests that ForS plays a role during B-  
295 ring closure, and that this constitutes the final step of fasamycin backbone biosynthesis.  
296 However, it also demonstrates that the final cyclization step can occur reasonably efficiently  
297 without ForS. While carrying out analysis of the  $\Delta forS$  mutant we also identified a new minor  
298 congener which was not otherwise identified in any WT strain fermentations. Scale up  
299 growth (4 L) and solvent extraction, followed by isolation (3.4 mg) and structural elucidation  
300 using the approaches described above, identified this compound (**13**) as the C24-carboxyl

301 analogue of fasamycin C (which we have named fasamycin F). This is the first fasamycin  
302 congener identified with the C24-carboxyl group intact.

303

## 304 Discussion

305 Using targeted metabolomics, we identified a new family of pyridine containing polyketide  
306 natural products that we have named the formicapyridines. Remarkably, these compounds  
307 are derived from the fasamycin/formicamycin biosynthetic machinery meaning that the *for*  
308 BGC is responsible for the production of three structurally differentiated pentacyclic scaffolds.  
309 Then, inspired by evolutionary considerations, we introduced a gene deletion into the BGC  
310 which significantly altered the relative levels of these metabolites in a targeted manner: the  
311 titre of formicapyridines was significantly increased (approx. 25-fold) in contrast to the  
312 fasamycin/formicamycins which were decreased to approx. one third of the WT titre. These  
313 results raise a series of questions about the cyclization events associated with the  
314 fasamycin/formicamycin biosynthetic pathway, as well as the maintenance of pathway  
315 fidelity.

316 Our data suggest that formation of ring-B of the fasamycin scaffold is the final biosynthetic  
317 step leading to the linear tetracyclic portion of the molecule, followed by thioester hydrolysis  
318 to liberate the ACP and subsequent decarboxylation to remove the carboxyl group attached  
319 to C24 (Fig. 5). Consistent with this, deletion of *forS* led to the isolation of a new shunt  
320 metabolite fasamycin F (**13**) with a C24-carboxyl group that was not observed from the WT.  
321 However, while ForS is implicated in ring-B cyclization it is not required for this role, nor,  
322 apparently, for the biosynthesis of any congeners. Rather, ForS seems to decrease the  
323 production of 'aberrant' congeners from the pathway, e.g. formicapyridines, while increasing  
324 overall productivity. The most parsimonious interpretation of these data is that another of the  
325 *for* BGC gene products is the actual catalyst for ring-B formation, and that ForS acts as a  
326 'chaperone' which modulates or stabilises the assembly, or arrangement, of a multienzyme  
327 complex to optimise production of the fasamycins, and therefore ultimately the  
328 formicamycins. This has the consequence of minimising the production of shunt metabolites,  
329 i.e. the formicapyridines. Thus, while deletion of *forS* leads to the phenotype desired from  
330 our thought experiment, the mechanism by which this occurs is not what was anticipated.  
331 Interpretation of the *for* BGC bioinformatic analysis above suggests the most likely candidate  
332 for a ring-B (final) cyclase is ForL, due to its close relationship with Tcml which catalyses a  
333 similar final cyclization step during tetraceomycin biosynthesis<sup>20, 21, 22</sup>. The apparent lack of  
334 any intermediates or shunt metabolites being accumulated by the remaining mutants is

335 somewhat surprising and suggests an absolute requirement for the formation of a PKS-  
336 cyclase complex before biosynthesis can be initiated.

337 These observations are reminiscent of studies regarding the biosynthesis of pradimicin<sup>33</sup>.  
338 The pradimicins are pentangular structures similar to the benastatins<sup>27, 28</sup>, and the BGC  
339 responsible for their production contains a complement of three PKS cyclases equivalent to  
340 ForD (PdmD), ForL (PdmK), and ForR (PdmL)<sup>33, 34</sup>. It also contains two ABM domain proteins  
341 (PdmH and PdmI; c.f. ForS and ForU) which were assigned monooxygenase roles. Through  
342 heterologous expression of PKS gene cassettes it was deduced that for the biosynthetic  
343 pathway to function correctly, and yield a pentangular backbone, all three cyclase genes  
344 (PdmDKL) plus the ABM domain monooxygenase PdmH must be co-expressed. It should be  
345 noted that in this pathway an oxidation reaction to form the quinone structure is required.  
346 These results led the authors to propose a model in which the two cyclases PdmKL and the  
347 monooxygenase PdmH form a multienzyme complex that engulfs the entire polyketide  
348 molecule during its assembly and work synergistically to ensure the correct reaction pathway  
349 occurs thereby minimising the production of shunt metabolites<sup>33</sup>. Similarly, formation of the  
350 unusual discoid metabolite resistomycin involves an extremely rare S-shaped folding pattern  
351 and requires the coordinated function, likely as a multienzyme complex, of core PKS  
352 proteins in addition to three distinct cyclase enzymes<sup>24</sup>. Moreover, heterologous  
353 reconstruction of the resistomycin pathway gave no products when the minimal PKS plus  
354 first cyclase were assembled<sup>24</sup>, a rare observation that is in keeping with our data showing  
355 the requirement of all the putative cyclases ForDLRU to produce any pathway derived  
356 metabolites, including shunts.

357 During biosynthesis of the *for* BGC polyketide backbones there is no requirement for  
358 the function of a monooxygenase. Consistent with this, deletion of *forS* does not abolish  
359 polyketide production, but instead affects pathway productivity and fidelity. Thus, based on  
360 our mutational data, and the observations discussed above, we hypothesise that ABM family  
361 enzymes can act as monooxygenases and/or as ancillary proteins to tune, in some way, the  
362 PKS enzyme complex function, and therefore the biosynthetic pathway, during aromatic  
363 polyketide biosynthesis. Genes encoding these proteins occur commonly in PKS BGCs, and  
364 multiple paralogues are often present, even when monooxygenase reactions are not  
365 required. It is noteworthy that several PKS cyclases occur as fusion proteins with an ABM  
366 domain, which can be located at either terminus. We speculate, tentatively, that these may  
367 represent examples of mature pathways where the chaperone-like function of the ABM  
368 family protein has become essential, leading to selective pressure for the encoding gene to  
369 become transcriptionally fused with other cyclase encoding genes.

## 370 **Materials & Methods**

371 **Chemistry methods and materials.** Unless stated otherwise all chemicals were supplied by  
372 Sigma-Aldrich or Fisher Scientific. [1,2-<sup>13</sup>C<sub>2</sub>] sodium acetate was purchased from  
373 CORTECNET. All solvents were of HPLC grade or equivalent. NMR spectra were recorded  
374 on a Bruker Avance III 400 MHz NMR spectrometer equipped with 5 mm BBFO Plus probe  
375 unless noted otherwise. The <sup>13</sup>C NMR spectra for **2** and isotopically enriched **2** after feeding  
376 [1,2-<sup>13</sup>C<sub>2</sub>] sodium acetate were recorded on a Bruker Avance III 500 MHz NMR spectrometer  
377 equipped with a DUL cryoprobe at 30°C.

378 Unless otherwise stated samples were analysed by LCMS/MS on a Nexera/Prominence  
379 UHPLC system attached to a Shimadzu ion-trap time-of-flight (IT-ToF) mass spectrometer.  
380 The spray chamber conditions were: heat-block, 300°C; 250° curved desorption line;  
381 interface (probe) voltage: 4.5 KV nebulizer gas flow rate 1.5 L/min; drying gas on. The  
382 instrument was calibrated using sodium trifluoroacetate cluster ions according to the  
383 manufacturer's instructions and run with positive-negative mode switching. The following  
384 analytical LCMS method was used throughout this study unless otherwise stated:  
385 Phenomenex Kinetex C<sub>18</sub> column (100 × 2.1 mm, 100 Å); mobile phase A: water + 0.1%  
386 formic acid; mobile phase B: methanol. Elution gradient: 0–1 min, 20% B; 1–12 min, 20%–  
387 100% B; 12–14 min, 100% B; 14–14.1 min, 100%–20% B; 14.1–17 min, 20% B; flow rate 0.6  
388 mL/min; injection volume 10 µL. Samples for were prepared for LCMS analysis by taking a  
389 rectangle of agar (2 cm<sup>3</sup>) from an agar plate culture and shaking with ethyl acetate (1 mL) for  
390 20 min. The ethyl acetate was transferred to a clean tube and the solvent removed under  
391 reduced pressure. The resulting extract was dissolved in methanol (200 µL).

392 **Standard microbiology and molecular biology methods.** All strains used or made in this  
393 study are described in Supplementary Table 1. All plasmids and ePACs used are described  
394 in Supplementary Table 2. All PCR primers used are described in Supplementary Table 3.  
395 The composition of media used are described in Supplementary Table 4. The antibiotics and  
396 their concentrations used are described in Supplementary Table 5. Standard DNA  
397 sequencing was carried out by Eurofins Genomics using the Mix2Seq kit (Ebersberg,  
398 Germany).

399 *E. coli* strains were cultivated at 37°C in LB Lennox Broth (LB), shaking at 220 rpm, or LB  
400 agar supplemented with antibiotics as appropriate. *S. formicae* was cultivated at 30°C on  
401 mannitol soya flour (MS) agar or MYM agar with appropriate antibiotic selection. To prepare  
402 *Streptomyces* spores, material from a single colony was plated out using a sterile cotton bud  
403 and incubated at 30°C for 7-10 days until a confluent lawn had grown over the entire surface



404 of the agar. Spores were harvested by applying 20% glycerol (2 mL) to the surface of the  
405 agar plate culture and gently removing spores with a sterile cotton bud before storing them  
406 at -80°C. Glycerol stocks of *E. coli* were made by pelleting the cells from an overnight *E. coli*  
407 culture (3-5 mL) in a bench top centrifuge (5000 rpm, 5 min) and resuspending in fresh,  
408 sterile 1:1 2YT/40% glycerol (1 mL). Glycerol stocks were stored at -80°C.

409 *S. formicae* genomic DNA and cosmid ePAC DNA (from *E. coli* DH10B) was isolated using a  
410 phenol:chloroform extraction method. Briefly, cells from an overnight culture (1 mL) were  
411 pelleted at 13,000 rpm in a benchtop microcentrifuge and resuspended in solution 1 (100 µL)  
412 (50 mM Tris/HCl, pH 8; 10 mM EDTA). Alkaline lysis was performed by adding solution 2  
413 (200 µL) (200 mM NaOH; 1%SDS) and mixing by inverting. Solution 3 (150 µL) (3M  
414 potassium acetate, pH 5.5) was added and samples mixed by inverting, before the soluble  
415 material was harvested by microcentrifugation at 13,000 rpm for 5 min. The nucleic acid was  
416 extracted with 25:24:1 phenol:chloroform:isoamyl alcohol (400 µL), and DNA was  
417 precipitated in 600 µL ice-cold isopropanol. After centrifugation, the resulting DNA pellet was  
418 washed in 200 µL 70% ethanol and air dried before being resuspended in water for  
419 quantification on a Nanodrop 2000c UV-Vis spectrophotometer. Plasmid DNA was isolated  
420 from *E. coli* strains using a Qiagen miniprep kit according to the manufacturer's instructions.  
421 PAC pESAC13-215-G DNA, containing the entire *for* BGC, was used as the template for all  
422 PCR reactions. DNA amplification for cloning was conducted using Q5 Polymerase and  
423 diagnostic PCR was set up using PCR BIO Taq Mix Red (PCR Biosystems), as per the  
424 manufacturers' instructions. Amplified fragments and digested DNA products were purified  
425 on 1% agarose gels by electrophoresis and extraction using the Qiagen gel extraction kit as  
426 per the manufacturer's instructions. For overlay bioassays soft LB agar (100 mL LB with 0.5%  
427 agar) was inoculated with *Bacillus subtilis* 168 (10 mL; approx. OD<sub>600</sub> = 0.6). Set  
428 concentrations of the compound for testing were made up in methanol and an aliquot (20 µL)  
429 was applied to Whatman 6mm antibiotic assay discs, air dried, and the discs placed in the  
430 centre of the solidified agar plates. Plates were incubated at 30°C overnight before being  
431 examined for zones of inhibition around the discs. For liquid culture bioassays, cultures of *B.*  
432 *subtilis* 168 (1 mL) were grown at 30°C, 200 rpm shaking, with the relevant antibiotic (50  
433 µg/mL). After 7 hours incubation, samples were taken from the cultures, diluted in series and  
434 plates for colony count in triplicate following Miles and Misra protocol<sup>35</sup>.

435 **Generating mutant strains of *S. formicae*.** CRISPR/Cas9 genome editing was conducted  
436 as described previously using the pCRISPomyces-2 plasmid supplied by Addgene<sup>1,2</sup>.  
437 Protospacers to use in the synthetic guide RNA (sgRNA) were annealed by heating to 95°C  
438 for 5 min followed by ramping to 4°C at 0.1°C/sec. Annealed protospacers were assembled  
439 into the pCRISPomyces-2 backbone at the *BbsI* site by Golden Gate assembly as described

440 previously<sup>5</sup>. The two homology repair template arms (each approx. 1kb) were assembled  
441 into the plasmid containing the sgRNA at the *Xba*I site using Gibson Assembly as described  
442 previously<sup>5</sup>. Genetic complementation was achieved using either the native promoter or the  
443 constitutive, high-level *ermE*\* promoter and single copies of the relevant gene(s) cloned into  
444 the integrative vector pMS82, as described previously<sup>5</sup>. Gibson assembly was used to fuse  
445 the gene(s) (and the native promoter if located distally in the BGC) and assemble them into  
446 the chosen plasmid. Plasmids were confirmed by PCR amplification and sequencing.  
447 Plasmids were then conjugated into *S. formicae* KY5 via the non-methylating *E. coli* strain  
448 ET12567 containing pUZ8002, as described previously<sup>5, 36</sup>. Ex-conjugants were selected on  
449 the appropriate antibiotics and plasmids were cured from *S. formicae* using temperature  
450 selection at 37°C.

451 **Production, purification and structure determination of formicapyridines.** *S. formicae*  
452 was cultivated on MS agar (14 L; approx. 450 plates) at 30°C for nine days. The agar was  
453 sliced into small pieces and extracted twice with ethyl acetate (10 L) using ultrasonication to  
454 improve the extraction. The extracts were combined, and the solvent removed under  
455 reduced pressure to yield a brown oil which was dissolved in methanol (20 mL). This extract  
456 was first chromatographed over a Phenomenex Gemini-NX reversed-phase column (C<sub>18</sub>,  
457 110 Å, 150 × 21.2 mm) using a Thermo Scientific Dionex Ultimate 3000 HPLC system and  
458 eluting with the following gradient method: (mobile phase A: water + 0.1% formic acid;  
459 mobile phase B: acetonitrile) 0–5 min 40% B; 5–35 min 40%–100% B; 35–40 min 100% B;  
460 40–40.1 min 100%–40% B; and 40.1–45 min 40% B; flowrate 20 mL/min; injection volume 1  
461 mL. Absorbance was monitored at 250 nm. Fractions (20 mL) were collected and analysed  
462 by LCMS. Fractions 2 to 4 contained **1-6** and were further purified by chromatography over a  
463 Phenomenex Gemini-NX semi-prep reversed-phase column (C<sub>18</sub>, 110 Å, 150 × 10 mm)  
464 using an Agilent 1100 series HPLC system and eluting with the following gradient method:  
465 (mobile phase A: water + 0.1% formic acid; mobile phase B: acetonitrile) 0–2 min 40% B; 2–  
466 20 min 40%–100% B; 20–21 min 100% B; 21–21.1 min 100%–40% B; 21.1–23 min 40% B;  
467 flowrate 3 mL/min; injection volume 100 µL). Absorbance was monitored at 390 nm. The  
468 samples were finally purified by Sephadex LH20 size exclusion chromatography with 100%  
469 methanol as the mobile phase. The isolated yields were: **1** (1 mg), **2** (2 mg), **3** (2 mg), **4** (0.7  
470 mg), **5** (1 mg) and **6** (0.6 mg). These pure compounds were subjected to analysis by HRMS  
471 and 1D and 2D NMR as described in the main text (see Figs 1 and 2). Spectroscopic and  
472 other data for each compound is presented in Supplementary Note 2.

473 **Stable isotope feeding experiment.** *S. formicae* was cultivated on MS agar (3 L; approx.  
474 100 plates) at 30°C and overlaid with [1,2-<sup>13</sup>C<sub>2</sub>] sodium acetate (1 mL of a 60 mM solution)  
475 after 24 h, 48 h, 72 h, 96 h and 120 h. After a further 72 h the agar was extracted and

476 purified using the methods described above to yield a sample of **2** (0.9 mg). This material  
477 was analyzed by LCMS and  $^{13}\text{C}$  NMR (125 MHz; 4096 scans;  $d_4$ -methanol). However, due to  
478 the weak and overlapping signals, only the following coupling constants ( $J_{\text{CC}}$ ) of the intact  
479 acetate units were recorded: C24-C1, 44.61 Hz; C2-C3, 68.58 Hz; C4-C5, 68.16Hz; C20-  
480 C21, 56.18 Hz. In addition, C14, C16, C18, and C22 have coupling constant of 66.47, 67.61,  
481 42.08 and 60.43 Hz respectively. Spectroscopic data is presented in Fig. 5 and  
482 Supplementary Figure 4.

483 **Production, purification and structure determination of fasamycin F (13).** *S. formicae*  
484  $\Delta\text{forS}$  was cultivated on 4L (~120 plates) of MS agar at 30°C for nine days. The agar was  
485 extracted and purified using the methods described above to yield **13** (3.4 mg). This material  
486 was analysed by LCMS and  $^{13}\text{C}$  NMR (100 MHz; 6500 scans;  $d_4$ -methanol). Spectroscopic  
487 data is presented in Supplementary Note 2.

488 **Chemical analysis of congener content in cyclase mutants.** *S. formicae* wild type or  
489 mutant strains (n=3) were grown on MS agar at 30°C for nine days. A rectangle of agar (2  
490  $\text{cm}^3$ ) was excised from each petri dish, sliced into small pieces and shaken with ethyl  
491 acetate (1 mL) for 20 min. The ethyl acetate was transferred to a clean tube and the solvent  
492 removed under reduced pressure. The resulting extract was dissolved in methanol (200  $\mu\text{L}$ )  
493 and analysed by LCMS but using the following modified UPLC method: Phenomenex Gemini  
494 C18 column (100  $\times$  2.1 mm, 100  $\text{\AA}$ ); mobile phase A: water + 0.1% formic acid; mobile  
495 phase B: methanol. Elution gradient: 0–2 min, 50% B; 2–14 min, 50%–100% B; 14–18 min,  
496 100% B; 18–18.1 min, 100%–50% B; 18.1–20 min, 50% B; flow rate 1 mL/min; injection  
497 volume 10  $\mu\text{L}$ .

498 Calibration curves (Supplementary Figure 10; Supplementary Dataset 2) were determined  
499 using standard solutions of fasamycin C **10** (10, 50, and 200  $\mu\text{M}$ ), formicamycin C **16** (10, 50,  
500 and 200  $\mu\text{M}$ ), formicaprydine D **4** (5, 10, 25, and 50  $\mu\text{M}$ ) and fasamycin F **13** (5, 10, and 100  
501  $\mu\text{M}$ ). The content of **10** and **16** was determined by UV absorption at 285 nm. The content of  
502 **4** and **13** was determined by MS analysis of the base peak chromatogram (positive mode).

503 **Data availability.** The authors declare that the data supporting the findings reported in  
504 this study are available within the article and the Supplementary Information or are available  
505 from the authors on reasonable request.

## 506 Acknowledgements

507 This work was supported by the Biotechnology and Biological Sciences Research Council  
508 (BBSRC) *via* Institute Strategic Program Project BBS/E/J/000PR9790 to the John Innes

509 Centre (ZQ) and by a Norwich Research Park BBSRC Postdoctoral Training Program  
510 Studentship BB/M011216/1 (RD). We thank Dr Lionel Hill and Dr Gerhard Saalbach (JIC) for  
511 excellent metabolomics support. We dedicate this manuscript to our deceased colleague Dr  
512 Karl A. Wilkinson (University of Cape Town) who provided helpful input and enlightening  
513 discussions during the early phases of this work.

## 514 **Author contributions**

515 Z.Q., R.D., B.W. and M.I.H. designed the research. Z.Q., R.D., B.W. and M.I.H. wrote the  
516 manuscript and all authors commented. Z.Q. performed the chemical experiments, R.D.  
517 performed the molecular genetics experiments.

## 518 **Competing interests**

519 The authors declare no competing financial interests.

520

## 521 **References**

[1] Flatt, P. M. & Mahnud, T. Biosynthesis of aminocyclitol-aminoglycoside antibiotics and related compounds. *Nat. Prod. Rep.* **24**, 358-392 (2007).

[2] Staunton, J. & Wilkinson, B. Biosynthesis of erythromycin and rapamycin. *Chem. Rev.* **97**, 2611-2630 (1997).

[3] Senges, C. H. R., Al-Dilaimi, A., Marchbank, D. H., Wibberg, D., Winkler, A., Haltli, B., Nowrousian, M., Kalinowski, J., Kerr, R. G. & Bandow, J. E. The secreted metabolome of *Streptomyces chartreusis* and implications for bacterial chemistry. *Proc. Natl. Acad. Sci. USA.* **115**, 2490-2495 (2018).

[4] Wilkinson, B., Foster, G., Rudd, B. A., Taylor, N.L., Blackaby, A. P., Sidebottom, P. J., Cooper, D. J., Dawson, M. J., Buss, A. D., Gaisser, S., Böhm, I. U., Rowe, C. J., Cortés, J., Leadlay, P. F. & Staunton, J. Novel octaketide macrolides related to 6-deoxyerythronolide B provide evidence for iterative operation of the erythromycin polyketide synthase. *Chem. Biol.* **7**, 111-117 (2000).

[5] Qin, Z., Munnoch, T. J., Devine, R., Holmes, N. A., Seipke, R. F., Wilkinson, K. A., Wilkinson, B. & Hutchings, M. I. Formicamycins, antibacterial polyketides produced by *Streptomyces formicae* isolated from African *Tetraponera* plant-ants. *Chem. Sci.* **8**, 3218-3227 (2017).

[6] Feng, Z., Kallifidas, D. & Brady, S. F. Functional analysis of environmental DNA-derived type II polyketide synthases reveals structurally diverse secondary metabolites. *Proc. Natl. Acad. Sci. USA* **108**, 12629-12634 (2011).

[7] Panter, F., Krug, D., Baumann, S. & Muller, R. Self-resistance guided genome mining uncovers new topoisomerase inhibitors from myxobacteria. *Chem. Sci.* **9**, 4898-4908 (2018).

[8] Awodi, U. R., Ronan, J. L., Masschelein, J., de los Santos, E. L. C. & Challis, G. L. Thioester reduction and aldehyde transamination are universal steps in actinobacterial polyketide alkaloid biosynthesis. *Chem. Sci.* **8**, 411-415 (2017).

[9] Wang, M., Carver, J. J., et al. Sharing and community curation of mass spectrometry data with Global Natural Products Social Molecular Networking. *Nature Biotechnol.* **34**, 828-837 (2016).

[10] Holmes, N. A., Devine, R., Qin, Z., Seipke, R. F., Wilkinson, B. & Hutchings, M. I. Complete genome sequence of *Streptomyces formicae* KY5, the formicamycin producer. *J. Biotechnol.* **265**, 116-118 (2018).

11 Konig, W. A., Krauss, C., Zahner, H. Metabolites from Microorganisms, 6-Chlorogenistein and 6,3'-Dichlorogenistein. *Helv. Chim. Acta.* **60**, 2071–2078 (1977).

[12] [www.reaxys.com](http://www.reaxys.com)

[13] Zeigler, D. R., Pragai, Z., Rodriguez, S., Chevreux, B., Muffler, A., Albert, T., Bai, R., Wyss, M., Perkins, J. B. The Origins of 168, W23, and Other *Bacillus subtilis* Legacy Strains. *J. Bacteriol.* **190**, 6983-6995 (2008).

[14] Kelley, L. A., Mezulis, S., Yates, C. M., Wass, M., N & Sternberg, M. J. E. The Phyre2 web portal for protein modelling, prediction and analysis. *Nat. Protoc.* **10**, 845-858 (2015).

[15] Ames, B. D., Korman, T. P., Zhang, W., Smith, P., Vu, T., Tang, Y. & Tsai, S. C. Crystal structure and functional analysis of tetracenomycin ARO/CYC: implications for cyclization of aromatic polyketides. *Proc. Natl. Acad. Sci. USA* **105**, 5349-5354 (2008).

[16] Summers, R. G., Wendt-Pienkowski, E., Motamedi, H. & Hutchinson, C. R. Nucleotide sequence of the tcmII-tcmIV region of the tetracenomycin C biosynthetic gene cluster of *Streptomyces glaucescens* and evidence that the *tcmN* gene encodes a multifunctional cyclase-dehydratase-O-methyl transferase. *J. Bacteriol.* **174**, 1810-1820 (1992).

[17] Shen, B., Summers, R. G., Wendt-Pienkowski, E. & Hutchinson, C. R. The *Streptomyces glaucescens* *tcmKL* polyketide synthase and *tcmN* polyketide cyclase genes govern the size and shape of aromatic polyketides. *J. Am. Chem. Soc.* **117**, 6811-6821 (1995).

[18] McDaniel, R., Ebert-Khosla, S., Hopwood, D. A. & Khosla, C. Rational design of aromatic polyketide natural products by recombinant assembly of enzymatic subunits. *Nature* **373**, 549-554 (1995).

[19] Zawada, R. J. X. & Khosla, C. Heterologous expression, purification, reconstitution and kinetic analysis of an extended type II polyketide synthase. *Chem. Biol.* **6**, 607-615 (1999).

[20] Summers, R. G., Wendt-Pienkowski, E., Motamedi, H. & Hutchinson, C. R. The tcmVI region of the tetracenomycin C biosynthetic gene cluster of *Streptomyces glaucescens*

encodes the tetracenomycin F1 monooxygenase, tetracenomycin F2 cyclase, and, most likely, a second cyclase. *J. Bacteriol.* **175**, 7571-7580 (1993).

[21] Shen, B. & Hutchinson, C. R. Tetracenomycin F2 cyclase: Intramolecular aldol condensation in the biosynthesis of tetracenomycin C in *Streptomyces glaucescens*. *Biochemistry* **32**, 11149-11154 (1993).

[22] Thompson, T. B., Katayama, K., Watanabe, K. Hutchinson, C. R. & Rayment, I. Structural and functional analysis of tetracenomycin F2 cyclase from *Streptomyces glaucescens*. A type II polyketide cyclase. *J. Biol. Chem.* **279**, 37956-37963 (2004).

[23] Jakobi, K. & Hertweck, C. A gene cluster encoding resistomycin biosynthesis in *Streptomyces resistomycificus*; exploring polyketide cyclization beyond linear and angucyclic patterns. *J. Am. Chem. Soc.* **126**, 2298-2299 (2004).

[24] Fritzsche, K., Ishida, K. & Hertweck, C. Orchestration of discoid polyketide cyclization in the resistomycin pathway. *J. Am. Chem. Soc.* **130**, 8307-8316 (2008).

[25] Silvennoninen, L., Sandalova, T. & Schneider, G. The polyketide cyclase RemF from *Streptomyces resistomycificus* contains an unusual octahedral zinc binding site. *FEBS Lett.* **583**, 2917-2921 (2009).

[26] Sciara, G., Kendrew, S. G., Miele, A. E., Marsh, N. G., Federici, L., Malatesta, F., Schimperna, G., Savino, C. & Vallone, B. The structure of ActVA-Orf6, a novel type of monooxygenase involved in actinorhodin biosynthesis. *EMBO J.* **22**, 205-215 (2003).

[27] Xu, Z., Schenk, A. & Hertweck, C. Molecular analysis of the benastatin biosynthetic pathway and genetic engineering of altered fatty acid-polyketide hybrids. *J. Am. Chem. Soc.* **129**, 6022-6030 (2007).

[28] Lackner, G., Schenck, A., Xu, Z., Reinhardt, K., Yunt, Z. S., Piel, J. & Hertweck, C. Biosynthesis of pentangular polyphenols: deductions from the benastatin and griseorhodin pathways. *J. Am. Chem. Soc.* **129**, 9306-9312 (2007).

[29] Davis, N. K. & Chater, K. F. Spore colour in *Streptomyces coelicolor* A3(2) involves the developmentally regulated synthesis of a compound biosynthetically related to polyketide antibiotics. *Mol. Microbiol.* **4**, 1679-1691 (1990).

[30] Blanco, G., Pereda, A., Méndez, C. & Salas, J. A. Cloning and disruption of a DNA fragment of *Streptomyces halstedii* involved in the biosynthesis of a spore pigment. *Gene* **112**, 59-65 (1992).

[31] Yu, T. -W. & Hopwood D. A. Ectopic expression of the *Streptomyces coelicolor* *whiE* genes for the polyketide spore pigment synthesis and their interaction with the *act* genes for actinorhodin biosynthesis. *Mol. Microbiol.* **141**, 2779-2792 (1995).

[32] Cobb, R. E., Wang, Y. & Zhao, H. High-efficiency multiplex genome editing of *Streptomyces* species using an engineered CRISPR/Cas system. *ACS Synth. Biol.* **4**, 723-728 (2015).

[33] Zhan, J., Watanabe, K. & Tang, Y. Synergistic actions of a monooxygenase and cyclases in aromatic polyketide biosynthesis. *ChemBioChem.* **9**, 1710-1715 (2008).

[34] Kim, B. C., Lee, J. M., Ahn, J. S. & Kim, B. S. Cloning, sequencing and characterization of the pradimicin biosynthetic gene cluster of *Actinomadura hibisca* P157-2. *J. Microbiol. Biotechnol.* **17**, 830-839 (2007).

[35] Miles, A. A., Misra, S. S., Irwin, J. O. The estimation of the bactericidal power of the blood. *J. Hyg (Lon)*. **38**, 732-749 (1938).

[36] Kieser, T., Bibb, M. J., Buttner, M. J., Chater, K. F., Hopwood, D. A. *Practical Streptomyces Genetics* (The John Innes Foundation Press, Norwich, 2000).
