# Supplementary material for: Aromatic polyketide biosynthesis: fidelity, evolution and engineering
Source: bioRxiv or medRxiv preprint supplement (doi:10.1101/581074), 2019-03-18
Supplement: Supplementary file [file media-1.pdf]

## Electronic Supporting information

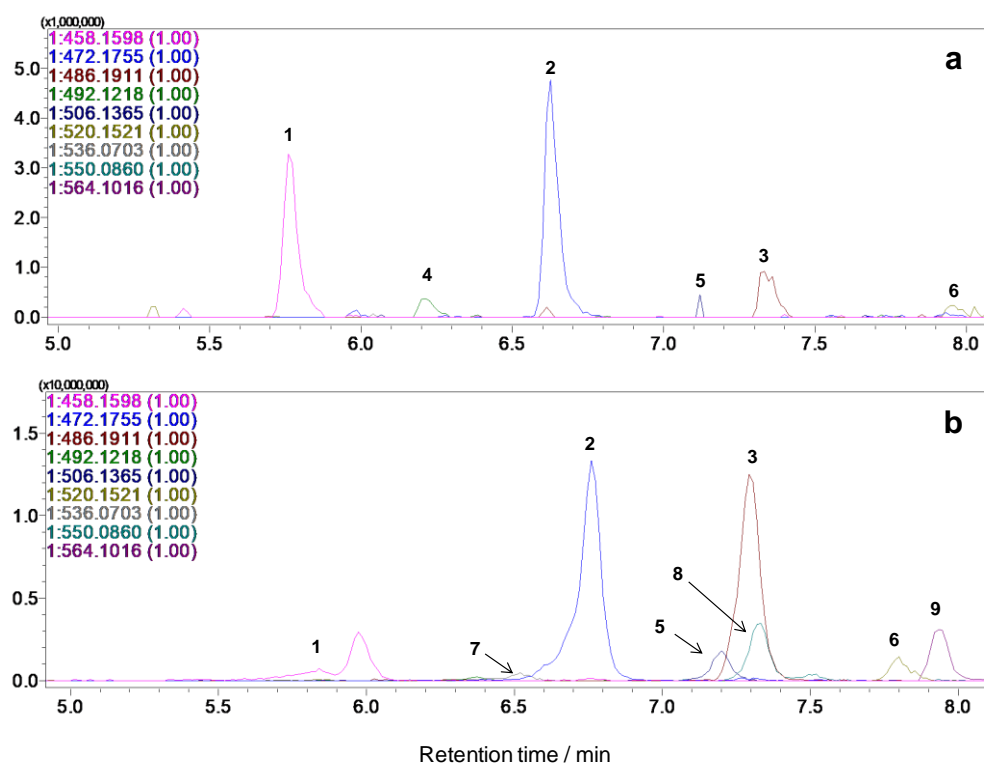

**Supplementary Figure 1** | Extracted ion chromatograms for **1-9** from LCMS runs of extracts from the WT strain grown on MS agar medium without (a) and with (b) exogenous addition of NaBr (the slight shifts in retention times for **1-6** was due to machine maintenance carried out between the experiments).

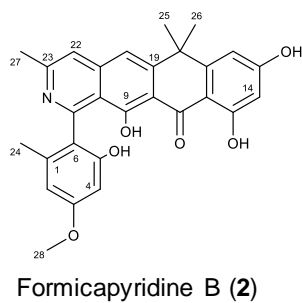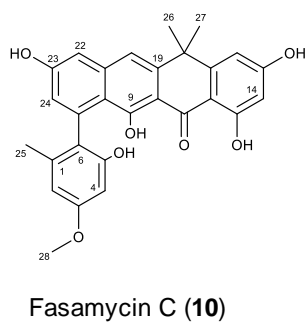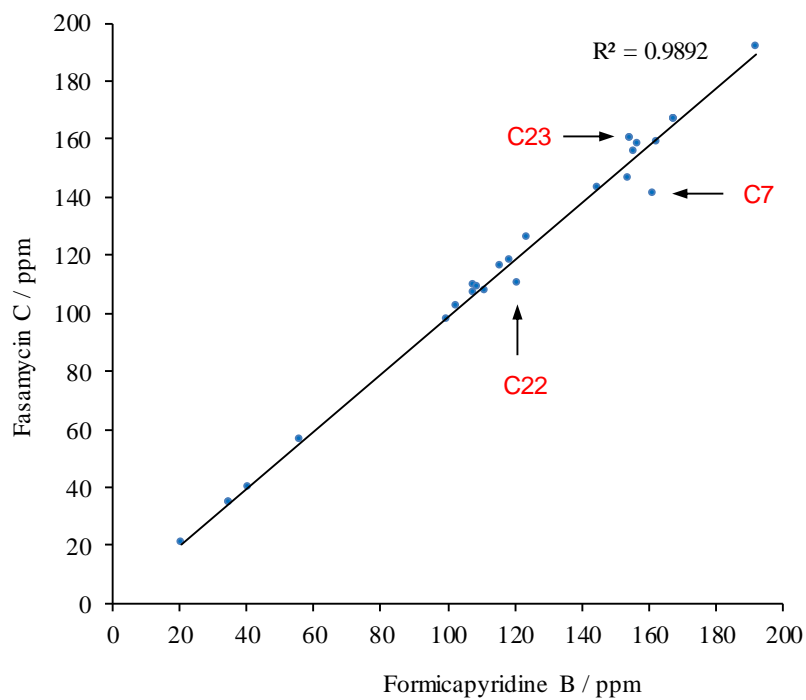

**Supplementary Figure 2** | Comparison of the  $^{13}\text{C}$  NMR chemical shifts for formicapyridine B (2) and fasamycin C (10). The chemical shifts for carbons C7, C22 and C23 are highlighted.

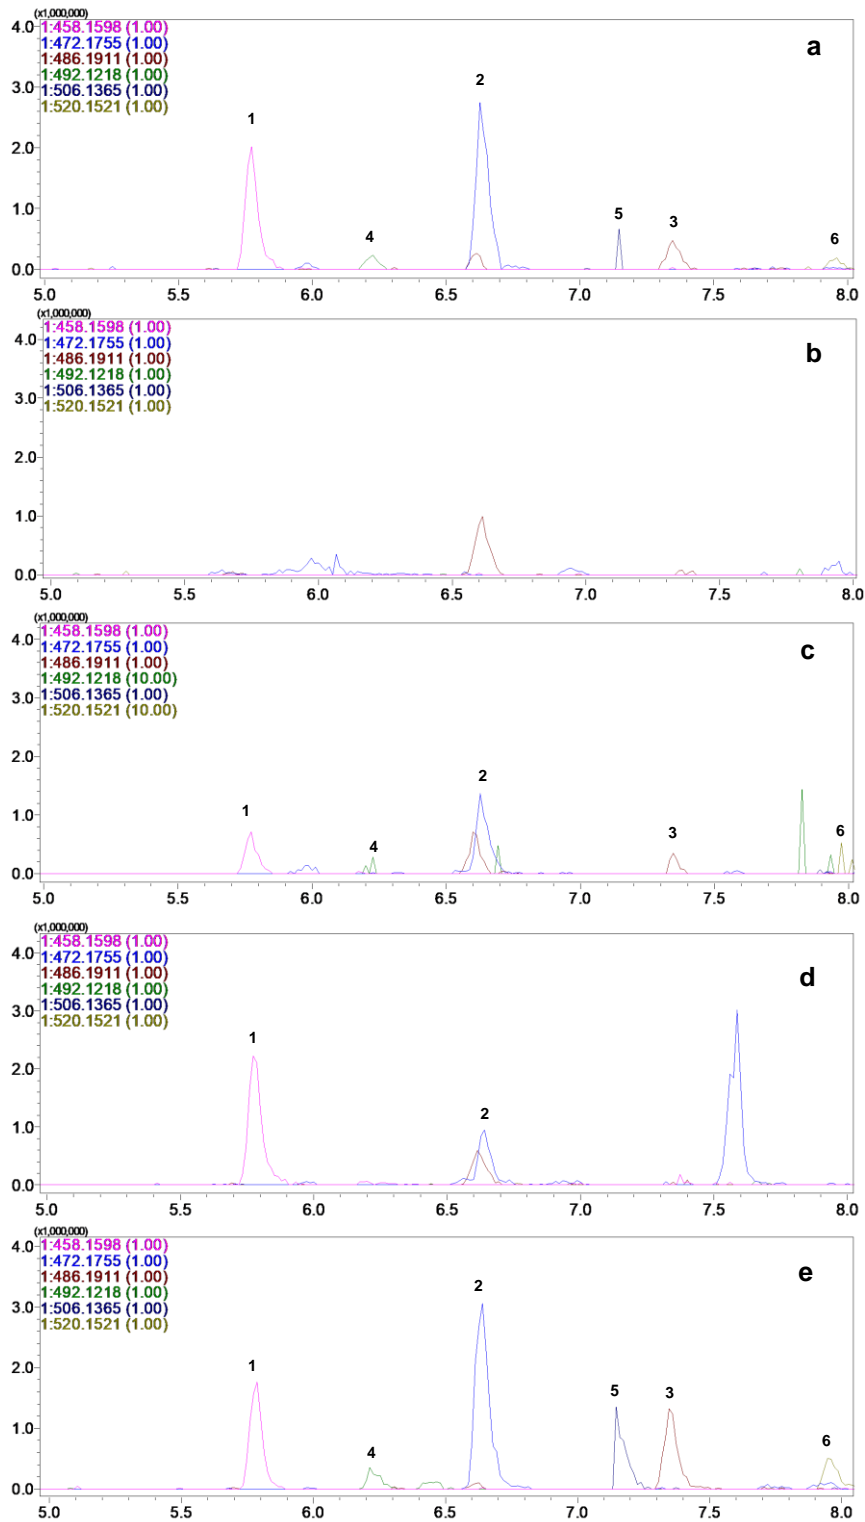

**Supplementary Figure 3** | Extracted ion chromatograms for 1-6 from LCMS runs of fermentation extracts for: (a) *S. formicae* WT; (b) *S. formicae*  $\Delta for$ ; (c) *S. formicae*  $\Delta for/for$ ; (d) *S. formicae*  $\Delta forV$ ; (e) *S. formicae*  $\Delta forv/forv$ . (The signal abundance of 4 and 6 in (c) was enlarged  $\times 10$  for clarity).

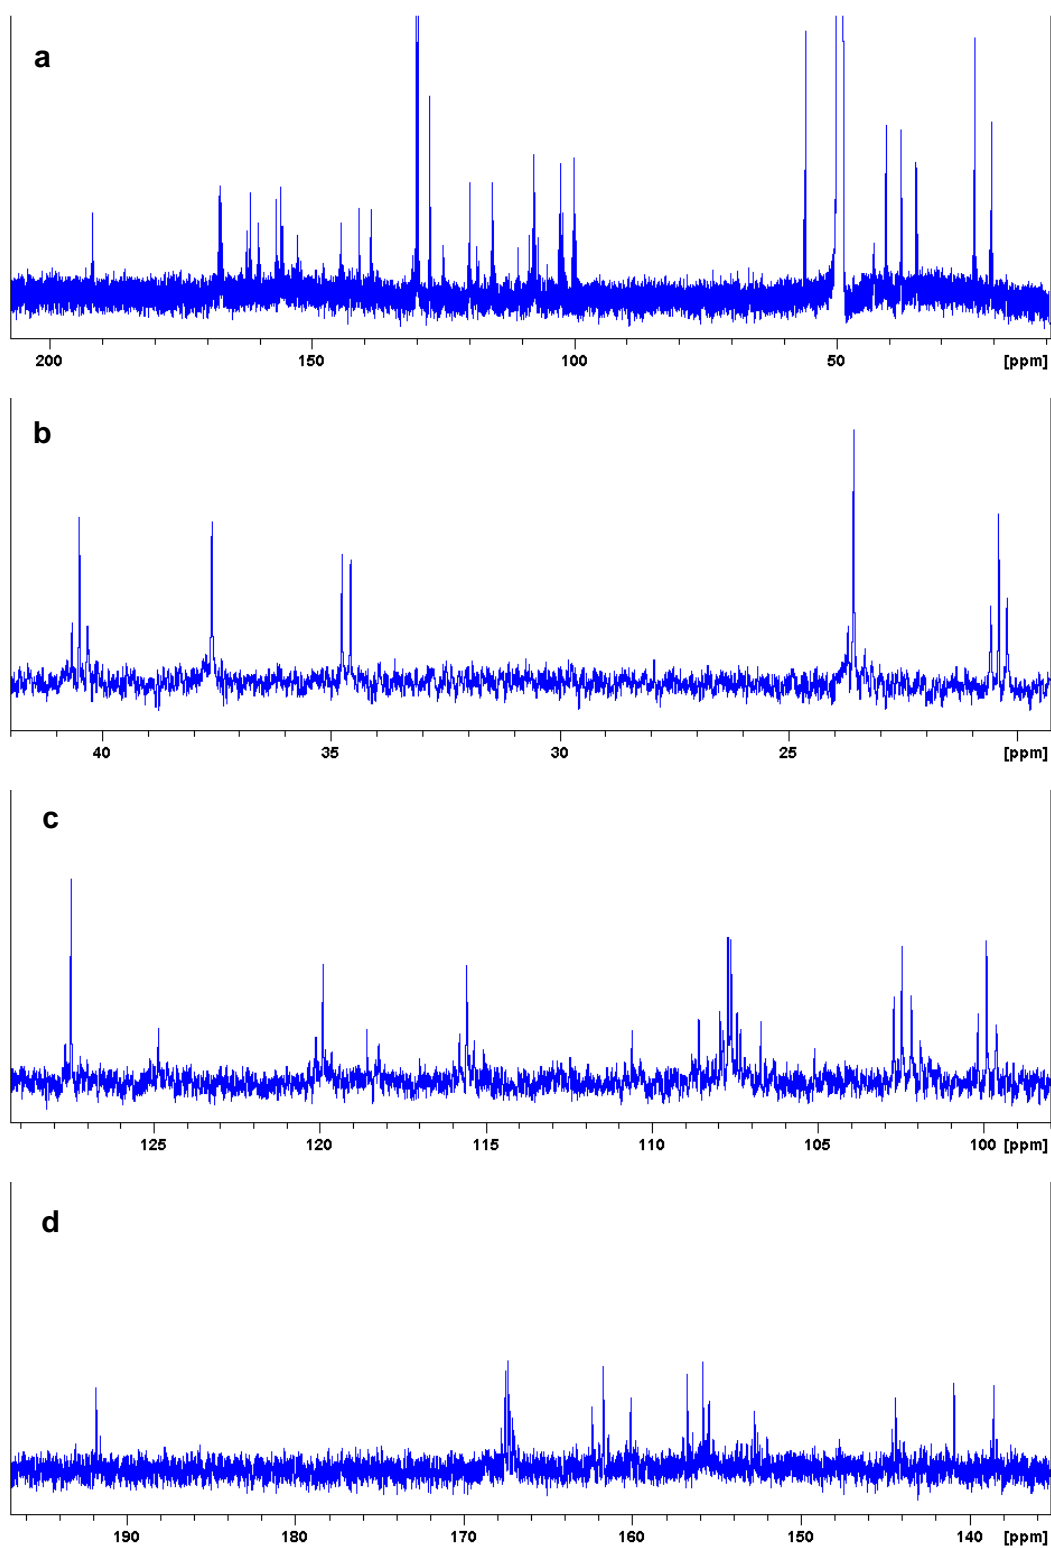

**Supplementary Figure 4** |  $^{13}\text{C}$  NMR spectra (125 MHz, methanol- $d_6$ ) of **2** isolated after growth of *S. formicae* WT in the presence of [1,2- $^{13}\text{C}_2$ ] sodium acetate: (a), full scale; (b)-(d), expanded scale.

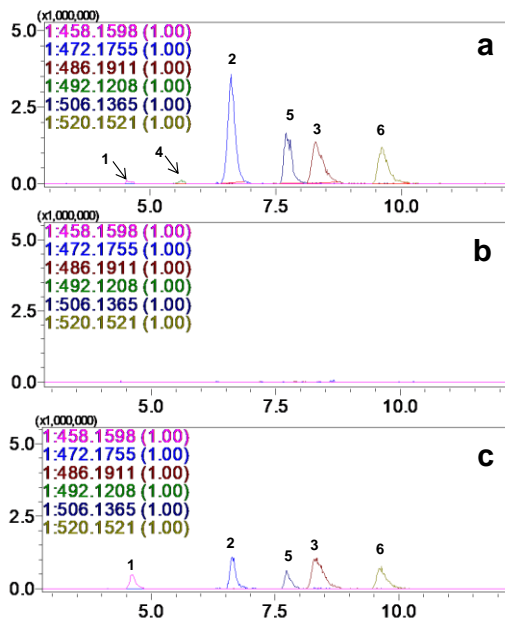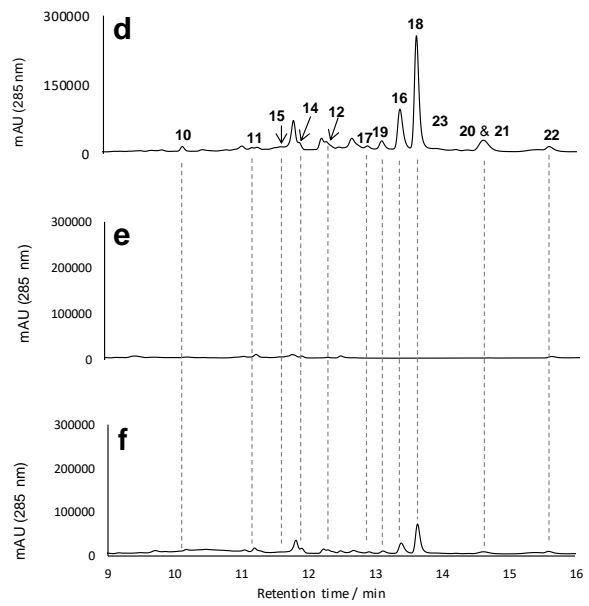

**Supplementary Figure 5 | Mutational analysis of *forD*.** Extracted ion chromatogram (left) and reconstituted HPLC-UV (285 nm) profiles (right) for extracts of *forD* mutagenesis and complementation experiments: (a) and (d) *S. formicae* wild-type; (b) and (e) *S. formicae*  $\Delta forD$ ; (c) and (f) *S. formicae*  $\Delta forD/forD$ .

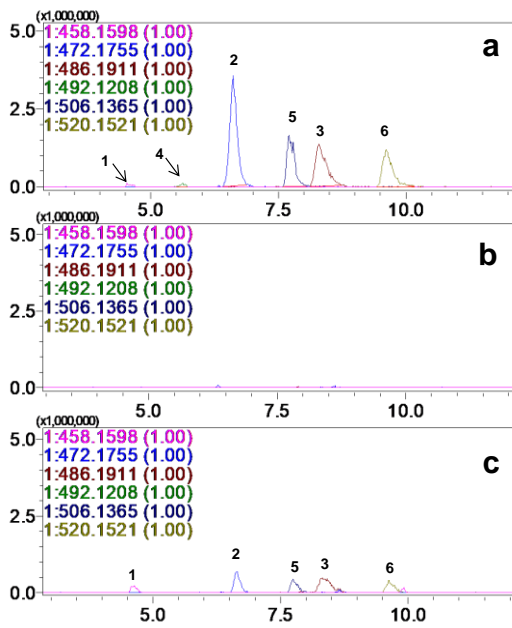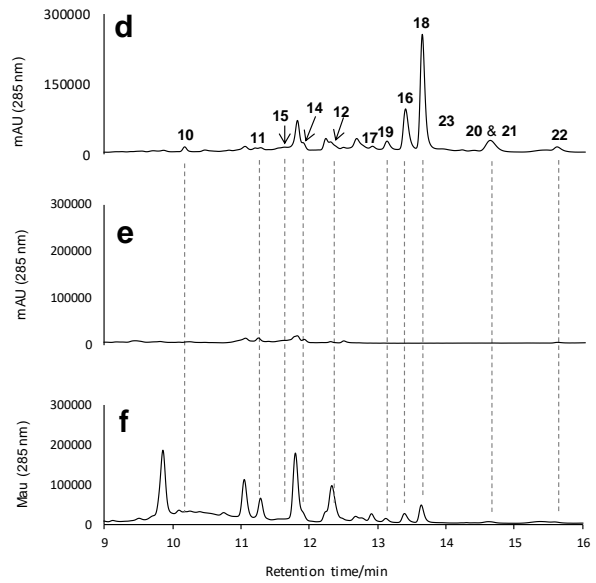

**Supplementary Figure 6 | Mutational analysis of *forL*.** Extracted ion chromatogram (left) and reconstituted HPLC-UV (285 nm) profiles (right) for extracts of *forL* mutagenesis and complementation experiments: (a) and (d) *S. formicae* wild-type; (b) and (e) *S. formicae*  $\Delta forL$ ; (c) and (f) *S. formicae*  $\Delta forL/forL$ .

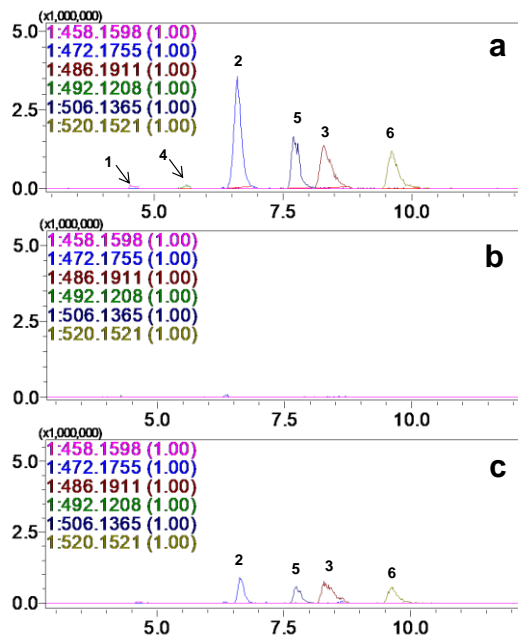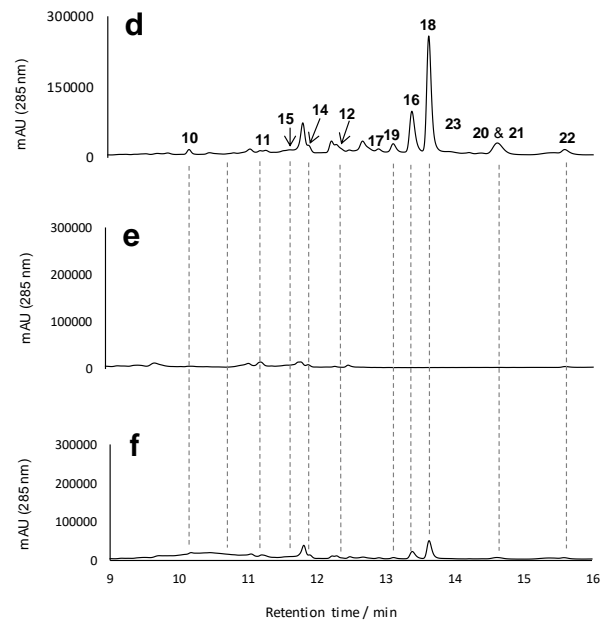

**Supplementary Figure 7 | Mutational analysis of *forR*.** Extracted ion chromatogram (left) and reconstituted HPLC-UV (285 nm) profiles (right) for extracts of *forR* mutagenesis and complementation experiments: (a) and (d) *S. formicae* wild-type; (b) and (e) *S. formicae*  $\Delta forR$ ; (c) and (f) *S. formicae*  $\Delta forR/forR$ .

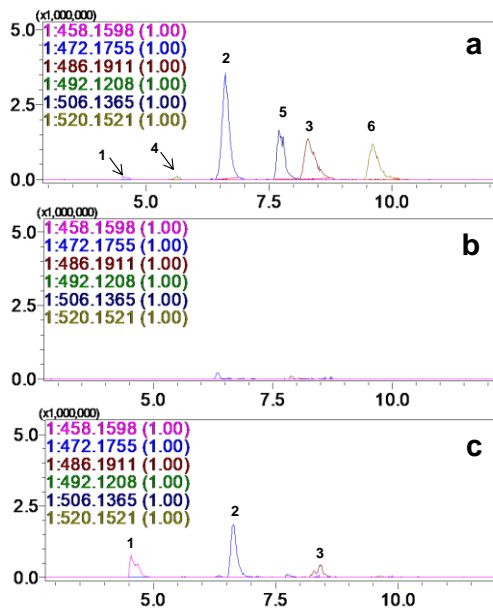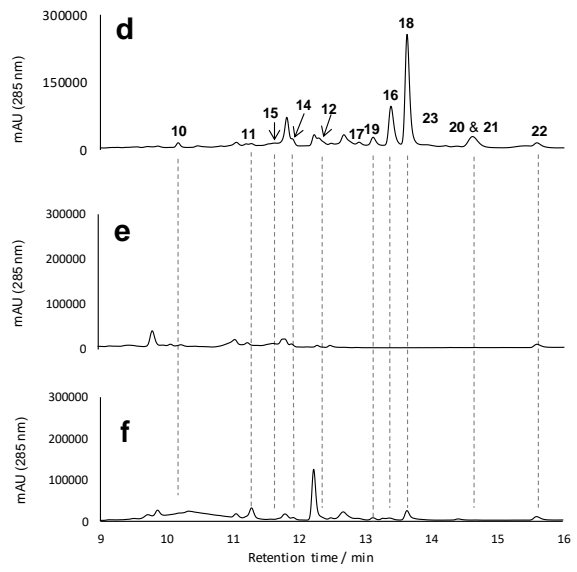

**Supplementary Figure 8 | Mutational analysis of *forU*.** Extracted ion chromatogram (left) and reconstituted HPLC-UV (285 nm) profiles (right) for extracts of *forU* mutagenesis and complementation experiments: (a) and (d) *S. formicae* wild-type; (b) and (e) *S. formicae*  $\Delta forU$ ; (c) and (f) *S. formicae*  $\Delta forU/forUV$ .



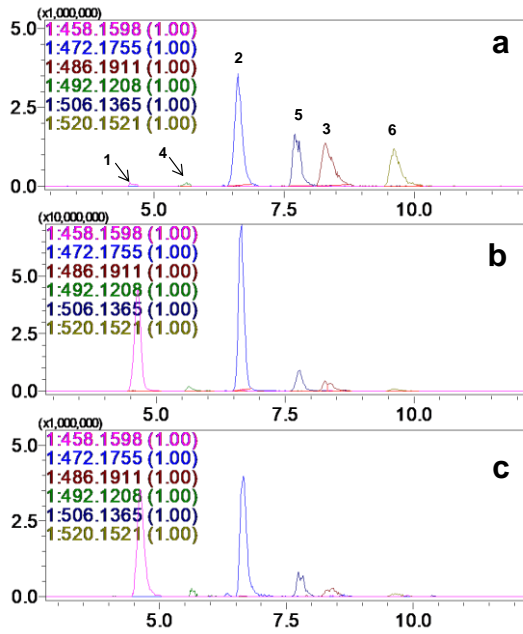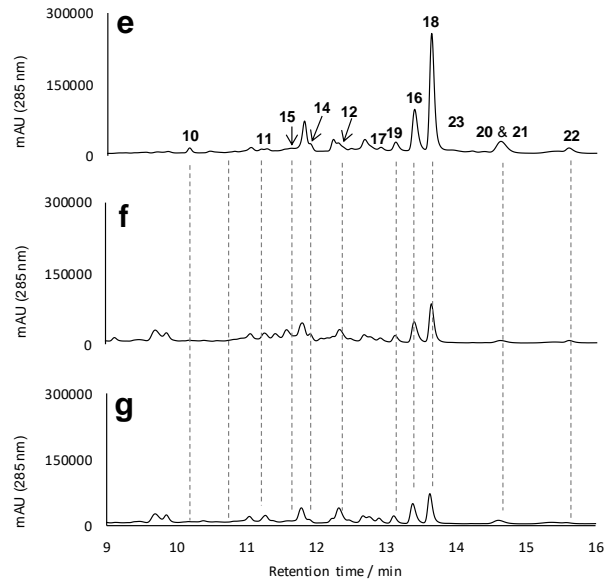

**Supplementary Figure 9 | Mutational analysis of *forS*.** Extracted ion chromatogram (left) and reconstituted HPLC-UV (285 nm) profiles (right) for extracts of *forS* mutagenesis and complementation experiments: (a) and (d) *S. formicae* wild-type; (b) and (e) *S. formicae*  $\Delta forS$ ; (c) and (f) *S. formicae*  $\Delta forS/forS$ .

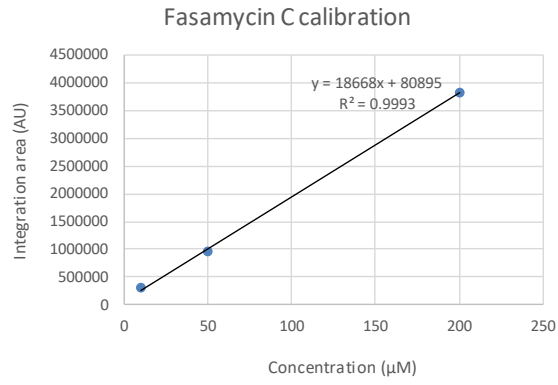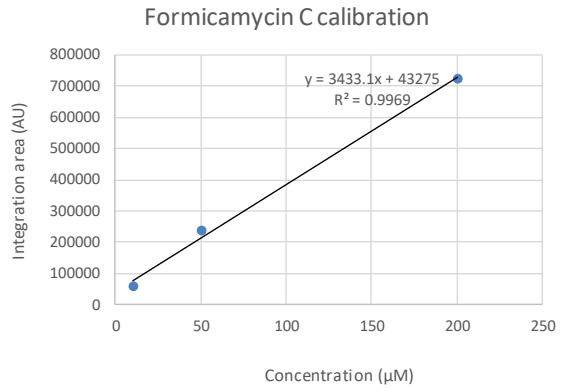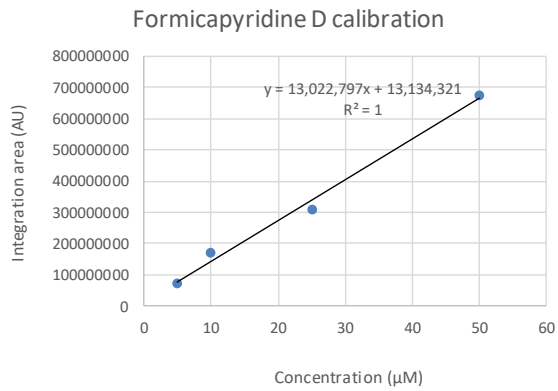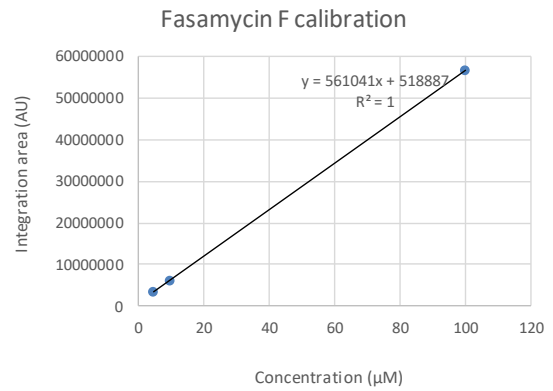

**Supplementary Figure 10 | Calibration curves of fasamycin C (10), formicamycin C (16), formicapryridine D (4), and fasamycin F (13).**

**Supplementary Table 1 | Strains made or used in this study.**

| Strain                                                   | Description                                                                                                                                                                    | Plasmid                    | Resistance                            | Source or Reference                                                            |
|----------------------------------------------------------|--------------------------------------------------------------------------------------------------------------------------------------------------------------------------------|----------------------------|---------------------------------------|--------------------------------------------------------------------------------|
| <i>E. coli</i><br>ET12567                                | <i>dam<sup>-</sup> dcm<sup>-</sup> hsdS<sup>-</sup></i>                                                                                                                        | <i>pUZ8002</i>             | <i>Cm<sup>R</sup>/Tet<sup>R</sup></i> | Reference<br>1                                                                 |
| <i>E. coli</i><br>Top10                                  | F– <i>mcrA</i> Δ( <i>mrr-hsdRMSmcrBC</i> )<br>Φ80/ <i>lacZ</i> ΔM15<br>Δ <i>lacX74 recA1 endA1</i><br><i>araD139</i> Δ( <i>ara leu</i> ) 7697<br><i>galU galK rpsL nupG</i>    |                            |                                       | Invitrogen,<br>USA                                                             |
| <i>E. coli</i><br>DH10β                                  | F– <i>mcrA</i> Δ( <i>mrr-hsdRMSmcrBC</i> )<br>Φ80/ <i>lacZ</i> ΔM15<br>Δ <i>lacX74 recA1 endA1</i><br><i>araD139</i> Δ( <i>ara leu</i> ) 7697<br><i>galU galK rpsL nupG λ-</i> |                            |                                       | Invitrogen,<br>USA                                                             |
| <i>S.</i><br><i>formicae</i>                             | Wild-type strain                                                                                                                                                               |                            |                                       | Reference<br><b>Error!</b><br><b>Bookmark</b><br><b>not</b><br><b>defined.</b> |
| <i>S.</i><br><i>formicae</i><br>Δ <i>for</i>             | Formicamycin ( <i>for</i> ) biosynthetic<br>gene cluster (BCG)<br>deleted                                                                                                      |                            |                                       | Reference<br><b>Error!</b><br><b>Bookmark</b><br><b>not</b><br><b>defined.</b> |
| <i>S.</i><br><i>formicae</i><br>Δ <i>for:for</i><br>ΦC31 | <i>for</i> BGC deleted and<br>complemented<br>with the <i>for</i> BGC in trans at<br>ΦC31                                                                                      | <i>PESAC-<br/>13 215-G</i> | <i>Kan<sup>R</sup>/Tsr</i>            | Reference<br><b>Error!</b><br><b>Bookmark</b><br><b>not</b><br><b>defined.</b> |
| <i>S.</i><br><i>formicae</i><br>Δ <i>forV</i>            | Halogenase ( <i>forV</i> ) gene<br>deleted                                                                                                                                     |                            |                                       | Reference<br><b>Error!</b><br><b>Bookmark</b><br><b>not</b><br><b>defined.</b> |
| <i>S.</i>                                                | Halogenase ( <i>forV</i> )                                                                                                                                                     | <i>pRD004</i>              | <i>Hyg<sup>R</sup></i>                | Reference                                                                      |

|                                                                       |                                                                                                                                                |        |                  |                                                 |
|-----------------------------------------------------------------------|------------------------------------------------------------------------------------------------------------------------------------------------|--------|------------------|-------------------------------------------------|
| <i>formicae</i><br>$\Delta$ <i>forV:forV</i><br><i>pForV</i>          | deleted and complemented at $\Phi$ BT1 under the native promoter                                                                               |        |                  | <b>Error!<br/>Bookmark<br/>not<br/>defined.</b> |
| S.<br><i>formicae</i><br>$\Delta$ <i>forD</i>                         | Cyclase ( <i>forD</i> ) gene deleted                                                                                                           |        |                  | This work                                       |
| S.<br><i>formicae</i><br>$\Delta$ <i>forD:forD</i><br><i>pForD</i>    | Cyclase ( <i>forD</i> ) deleted and complemented at $\Phi$ BT1 under the native promoter                                                       | pRD012 | Hyg <sup>R</sup> | This work                                       |
| S.<br><i>formicae</i><br>$\Delta$ <i>forL</i>                         | Cyclase ( <i>forL</i> ) gene deleted                                                                                                           |        |                  | This work                                       |
| S.<br><i>formicae</i><br>$\Delta$ <i>forL:forL</i><br><i>pForL</i>    | Cyclase ( <i>forL</i> ) deleted and complemented at $\Phi$ BT1 under the native promoter                                                       | pRD013 | Hyg <sup>R</sup> | This work                                       |
| S.<br><i>formicae</i><br>$\Delta$ <i>forS</i>                         | Cyclase ( <i>forR</i> ) gene deleted                                                                                                           |        |                  | This work                                       |
| S.<br><i>formicae</i><br>$\Delta$ <i>forS:forS</i><br><i>pErmE*</i>   | Cyclase ( <i>forR</i> ) deleted and complemented at $\Phi$ BT1 under the ErmE* promoter                                                        | pRD015 | Hyg <sup>R</sup> | This work                                       |
| S.<br><i>formicae</i><br>$\Delta$ <i>forR</i>                         | Cyclase ( <i>forS</i> ) gene deleted                                                                                                           |        |                  | This work                                       |
| S.<br><i>formicae</i><br>$\Delta$ <i>forR:forR-A</i><br><i>pErmE*</i> | Cyclase ( <i>forS</i> ) deleted and complemented with <i>forR</i> and <i>forA</i> (directly downstream) at $\Phi$ BT1 under the ErmE* promoter | pRD017 | Hyg <sup>R</sup> | This work                                       |
| S.<br><i>formicae</i><br>$\Delta$ <i>forU</i>                         | Cyclase ( <i>forU</i> ) gene deleted                                                                                                           |        |                  | This work                                       |

|                                                                        |                                                                                                                                                                   |        |                  |           |
|------------------------------------------------------------------------|-------------------------------------------------------------------------------------------------------------------------------------------------------------------|--------|------------------|-----------|
| S.<br><i>formicae</i><br>$\Delta$ <i>forU:forU-</i><br><i>V pErmE*</i> | Cyclase ( <i>forU</i> )<br>deleted and complemented with<br><i>forU</i> and <i>forV</i> (directly<br>downstream) at $\Phi$ BT1 under<br>the <i>ErmE*</i> promoter | pRD019 | Hyg <sup>R</sup> | This work |
|------------------------------------------------------------------------|-------------------------------------------------------------------------------------------------------------------------------------------------------------------|--------|------------------|-----------|

**Supplementary Table 2 | Plasmids and ePACs used in this study.**

| Plasmids and ePACs | Description                                                                                                                                                                                                                      | Source or Reference                             |
|--------------------|----------------------------------------------------------------------------------------------------------------------------------------------------------------------------------------------------------------------------------|-------------------------------------------------|
| pCRISPomyces-2     | Streptomyces plasmid for expression of codon-optimized Cas9 and a single guide RNA                                                                                                                                               | Reference 2                                     |
| pUZ8002            | Non-transmissible RK2 derivative with a mutation in <i>oriT</i>                                                                                                                                                                  | Reference 3                                     |
| pESAC13-215-G      | ePAC clone harbouring the <i>For</i> BGC integrative $\Phi$ C31                                                                                                                                                                  | Reference <b>Error! Bookmark not defined.</b> 1 |
| pMS82              | $\Phi$ BT1 <i>attP-int</i> derived integration vector for the conjugal transfer of DNA from <i>E. coli</i> to <i>Streptomyces</i> (Hyg <sup>R</sup> )                                                                            | Reference 4                                     |
| pIJ10257           | Plasmid for the conjugal transfer of DNA (under control of the <i>ermE*</i> constitutive promoter) from <i>E. coli</i> to <i>Streptomyces</i> spp. Integrates specifically at the $\Phi$ BT1 attachment site (Hyg <sup>R</sup> ) | Reference 5                                     |
| pRD004             | PMS82 pForV ForV complementation plasmid                                                                                                                                                                                         | This work                                       |
| pRD012             | PMS82 pForD ForD                                                                                                                                                                                                                 | This work                                       |

|        |                                               |           |
|--------|-----------------------------------------------|-----------|
|        | complementation plasmid                       |           |
| pRD013 | PMS82 pForL ForL<br>complementation plasmid   | This work |
| pRD015 | pIJ10257 ForR-ForA<br>complementation plasmid | This work |
| pRD017 | pIJ10257 ForS<br>complementation plasmid      | This work |
| pRD019 | pIJ10257 ForU-ForV<br>complementation plasmid | This work |

**Supplementary Table 3 | PCR primers used in this study.**

| Primer name           | Sequence                                               | Description                                                               |
|-----------------------|--------------------------------------------------------|---------------------------------------------------------------------------|
| pCRISP-2 For<br>TEST  | AGGCTAGTCCGTTATCAACTTGA<br>AA                          | Detection of pCRISP<br>and cloning inserts<br>around XbaI site<br>forward |
| pCRISP-2 Rev<br>TEST  | TCGCCACCTCTGACTTGAGCGTC<br>GA                          | Detection of pCRISP<br>and cloning inserts<br>around XbaI site<br>reverse |
| Spacer primer         | atacggctgccagataaggc                                   | Detection of gRNA<br>insert at BbsI site via<br>sequencing                |
| pms82 Rev             | gccagtggtattatgtcaacaccgcc                             | Detection of Pms82 and<br>cloning inserts around<br>HINDIII site reverse  |
| FOR pMS82             | gcaacagtgccgttgatcgtgctatg                             | Detection of Pms82 and<br>cloning inserts around<br>HINDIII site forward  |
| RD206 ForD 1.1<br>For | gctcgggtgccgccggcggttttaTCTAGAc<br>cagttcggccacggactgc | pCRISPomyces-2<br>template 1 left flank<br>ForD                           |
| RD207 ForD 1.2<br>Rev | GCTGCTGCGACCAGGCGAGCTC<br>GCcaccggtcaggctcccttcg       | pCRISPomyces-2<br>template 1 right flank<br>ForD                          |
| RD208 ForD 2.1<br>For | GCGAGCTCGCCTGGTCGCAGCA<br>GCgtatgagcgccaccgaggcc       | pCRISPomyces-2<br>template 2 left flank                                   |

|                            |                                                             |                                                  |
|----------------------------|-------------------------------------------------------------|--------------------------------------------------|
|                            |                                                             | ForD                                             |
| RD209 ForD 2.2<br>Rev      | gcaacgcggccttttacggttctggccTCTA<br>GAccaacggccagacggcgcgctc | pCRISPomyces-2<br>template 2 right flank<br>ForD |
| RD209 ForD<br>gRNA For     | ACGCtggatgcgcatgaacgcgaa                                    | ForD gRNA forward                                |
| RD210 ForD<br>gRNA Rev     | AAACttcgcgttcatgcgcatcca                                    | ForD gRNA reverse                                |
| RD211 ForD Test<br>Int For | ccacgctggtcgaacagtgc                                        | Confirmation of ForD<br>deletion external for    |
| RD212 ForD Test<br>Int Rev | gcgagtctgaccaggcgctc                                        | Confirmation of ForD<br>deletion external rev    |
| RD213 ForD Test<br>Ext For | ctcctggtcaccgacgagg                                         | Confirmation of ForD<br>deletion internal for    |
| RD214 ForD Test<br>Ext Rev | gcatggcgcaggtgcacacc                                        | Confirmation of ForD<br>deletion internal rev    |
| RD215 ForL 1.1<br>For      | gctcggttgccgccgggctttttaTCTAGAg<br>cagcacgccgaccagcacg      | pCRISPomyces-2<br>template 1 left flank<br>ForL  |
| RD216 ForL 1.2<br>Rev      | GCTGCTGCGACCAGGCGAGCTC<br>Gctagtcgcccatggcggacc             | pCRISPomyces-2<br>template 1 right flank<br>ForL |
| RD217 ForL 2.1<br>For      | GCGAGCTCGCCTGGTCGCAGCA<br>GCcatggacgaactcccttcgcc           | pCRISPomyces-2<br>template 2 left flank<br>ForL  |
| RD218 ForL 2.2<br>Rev      | gcaacgcggccttttacggttctggccTCTA<br>GAgctaaggaggtggccgagg    | pCRISPomyces-2<br>template 2 right flank<br>ForL |
| RD219 ForL gRNA<br>For     | ACGCgagccccaactgccttgga                                     | ForL gRNA forward                                |
| RD220 ForL gRNA<br>Rev     | AAACtaccaaggcagttggggctc                                    | ForL gRNA reverse                                |
| RD221 ForL Test<br>Int For | cgagggcgagcagcaggcg                                         | Confirmation of ForL<br>deletion external for    |
| RD222 ForL Test<br>Int Rev | cggcacgcgagttcggtggc                                        | Confirmation of ForL<br>deletion external rev    |

|                            |                                                           |                                                  |
|----------------------------|-----------------------------------------------------------|--------------------------------------------------|
| RD223 ForL Test<br>Ext For | cgctcggtcgccacggcc                                        | Confirmation of FoL<br>deletion internal for     |
| RD224 ForL Test<br>Ext Rev | ccgcgtgatgacagatgcgcc                                     | Confirmation of ForL<br>deletion internal rev    |
| RD235 ForR 1.1<br>For      | gctcggttgccgccgggcggttttaTCTAGAct<br>tcggcaagcagttcttcg   | pCRISPomyces-2<br>template 1 left flank<br>ForR  |
| RD236 ForR 1.2<br>Rev      | GCTGCTGCGACCAGGCGAGCTC<br>GCggtcatggttctcctgtcc           | pCRISPomyces-2<br>template 1 right flank<br>ForR |
| RD237 ForR 2.1<br>For      | GCGAGCTCGCCTGGTCGCAGCA<br>GCacatgacccggcaggtcgcc          | pCRISPomyces-2<br>template 2 left flank<br>ForR  |
| RD238 ForR 2.2<br>Rev      | gcaacgcggccttttacggttcttgccTCTA<br>GAccgagccgtgcgcgttgacg | pCRISPomyces-2<br>template 2 right flank<br>ForR |
| RD239 ForR<br>gRNA For     | ACGCcgtagaggaaactcctcggagta                               | ForR gRNA forward                                |
| RD240 ForR<br>gRNA Rev     | AAACtactccgaggagttcctctacg                                | ForR gRNA reverse                                |
| RD241 ForR Test<br>Int For | gcacatacgccatcaggtcgc                                     | Confirmation of ForR<br>deletion external for    |
| RD242 ForR Test<br>Int Rev | ggtccatgcgtgggcctcg                                       | Confirmation of ForR<br>deletion external rev    |
| RD243 ForR Test<br>Ext For | cggcgagcgggtcttcgac                                       | Confirmation of ForR<br>deletion internal for    |
| RD244 ForR Test<br>Ext Rev | cgtgccggtcgttctgcttgg                                     | Confirmation of ForR<br>deletion internal rev    |
| RD245 ForS 1.1<br>For      | gctcggttgccgccgggcggttttaTCTAGAg<br>aggagcacctcaccatgacg  | pCRISPomyces-2<br>template 1 left flank<br>ForS  |
| RD246 ForS 1.2<br>Rev      | GCTGCTGCGACCAGGCGAGCTC<br>GCgctacatcgggtgccctccac         | pCRISPomyces-2<br>template 1 right flank<br>ForS |
| RD247 ForS 2.1<br>For      | GCGAGCTCGCCTGGTCGCAGCA<br>GCtgatccgacccaacggggac          | pCRISPomyces-2<br>template 2 left flank          |



|                            |                                                              |                                                  |
|----------------------------|--------------------------------------------------------------|--------------------------------------------------|
|                            |                                                              | ForS                                             |
| RD248 ForS 2.2<br>Rev      | gcaacgcggccttttacggttctctggccTCTA<br>GAgaagcgcgggtgatcatgacg | pCRISPomyces-2<br>template 2 right flank<br>ForS |
| RD249 ForS gRNA<br>For     | ACGCggggttgaggacgtaggtga                                     | ForS gRNA forward                                |
| RD250 ForS gRNA<br>Rev     | AAACtcacctacgtccacaaaccc                                     | ForS gRNA reverse                                |
| RD251 ForS Test<br>Int For | cctcgtcaggacagcacgg                                          | Confirmation of ForS<br>deletion external for    |
| RD252 ForS Test<br>Int Rev | cgatgcgtacgtcgacgttgc                                        | Confirmation of ForS<br>deletion external rev    |
| RD253 ForS Test<br>Ext For | gcctctgcgcggtgagc                                            | Confirmation of ForS<br>deletion internal for    |
| RD254 ForS Test<br>Ext Rev | cgcgtcgaagcaggagacgg                                         | Confirmation of ForS<br>deletion internal rev    |
| RD265 ForU 1.1<br>For      | gctcggttgccgcccggcggttttaTCTAGAc<br>gtagtactgccgcggttc       | pCRISPomyces-2<br>template 1 left flank<br>ForU  |
| RD266 ForU 1.2<br>Rev      | GCTGCTGCGACCAGGCGAGCTC<br>GCgatgagtgaccagcagcgcc             | pCRISPomyces-2<br>template 1 right flank<br>ForU |
| RD267 ForU 2.1<br>For      | GCGAGCTCGCCTGGTCGCAGCA<br>GCcatgtggagctgccctcactc            | pCRISPomyces-2<br>template 2 left flank<br>ForU  |
| RD268 ForU 2.2<br>Rev      | gcaacgcggccttttacggttctctggccTCTA<br>GAgttcttgcccgcgacgttg   | pCRISPomyces-2<br>template 2 right flank<br>ForU |
| RD269 ForU<br>gRNA For     | ACGCgtggccctctgagctacgt                                      | ForU gRNA forward                                |
| RD270 ForU<br>gRNA Rev     | AAACacgtagctcaagagggccac                                     | ForU gRNA reverse                                |
| RD271 ForU Test<br>Int For | ggtccactgcggcaggtcg                                          | Confirmation of ForU<br>deletion external for    |
| RD272 ForU Test<br>Int Rev | gcgcggttctcgtcgagcg                                          | Confirmation of ForU<br>deletion external rev    |

|                            |                                                    |                                                          |
|----------------------------|----------------------------------------------------|----------------------------------------------------------|
| RD273 ForU Test<br>Ext For | ggtcacgaagtcgacgtcgg                               | Confirmation of ForU<br>deletion internal for            |
| RD274 ForU Test<br>Ext Rev | cggtagccgtggtaggtgagg                              | Confirmation of ForU<br>deletion internal rev            |
| RD307 ForD<br>pMS82 pF     | gccgagaaccTAGGATCCAAGCTTgtg<br>gagctgccctcactctc   | ForD pMS82-promotor<br>for complementation<br>forward    |
| RD308 ForD<br>pMS82 pR     | cgttctcggtagctcgggacggtaggtgctc<br>ctcctg          | ForD promotor-gene for<br>complementation<br>reverse     |
| RD309 ForD<br>pMS82 gF     | caggaggagcacctcaccgtgcccagactcac<br>cgagaacg       | ForD promotor-gene for<br>complementation<br>forward     |
| RD310 ForD<br>PMS82 gR     | CTGGTACCATGCATAGATCTAAG<br>CTTcctcggtagcgtcatcacgg | ForD gene-pMS82 for<br>complementation<br>reverse        |
| RD311 ForL<br>pMS82 pF     | gccgagaaccTAGGATCCAAGCTTgat<br>tcttcggcgcacgacag   | ForL pMS82-promotor<br>for complementation<br>forward    |
| RD312 ForL<br>pMS82 pR     | cgacgatcaacgtggtgtgcataccggctcccat<br>cggttgc      | ForL promotor-gene for<br>complementation<br>reverse     |
| RD313 ForL<br>pMS82 gF     | gcaaccgatgggagccggtagcacaccacgtt<br>gatcgtcg       | ForL promotor-gene for<br>complementation<br>forward     |
| RD314 ForL<br>pMS82 gR     | CTGGTACCATGCATAGATCTAAG<br>CTTctactcgacggggactacgc | ForL gene-pMS82 for<br>complementation<br>reverse        |
| RD512 ForR-ForA<br>ErmE* F | AAAAAcatatgatgaccacgcacaccgtgc                     | ForRA complementation<br>under ErmE* forward<br>pIJ10257 |
| RD513 ForR-ForA<br>ErmE* R | AAAAAaagctttcacctcagctccctccggtc                   | ForRA complementation<br>under ErmE* reverse<br>pIJ10257 |
| RD516 ForS<br>ErmE* F      | AAAAAcatatgatgagccaggaggagccgc                     | ForS complementation<br>under ErmE* forward              |

|                            |                                |                                                              |
|----------------------------|--------------------------------|--------------------------------------------------------------|
|                            |                                | pIJ10257                                                     |
| RD517 ForS<br>ErmE* R      | AAAAAaagctttcagaggggtgctgccgtg | ForS complementation<br>under ErmE* reverse<br>pIJ10257      |
| RD518 ForU-ForV<br>ErmE* F | AAAAAcatatgatggccgagatctccgccg | ForU-V<br>complementation under<br>ErmE* forward<br>pIJ10257 |
| RD519 ForU-ForV<br>ErmE* R | AAAAAaagcttcgctctgctctgtgccgtc | ForU-V<br>complementation under<br>ErmE* reverse<br>pIJ10257 |

**Supplementary Table 4 | Growth media used in this study**

| Media | Recipe (per litre)                                                                                           | Water                  | pH      |
|-------|--------------------------------------------------------------------------------------------------------------|------------------------|---------|
| LB    | 10 g tryptone<br>5 g yeast extract<br>10 g NaCl (omitted when<br>selecting with Hygromycin)<br>+/- 20 g agar | Deionised              | 7.5     |
| MS    | 20 g soy flour<br>20 g mannitol<br>20 g agar                                                                 | Tap                    | As made |
| MYM   | 4 g maltose<br>4 g yeast extract<br>10 g malt extract<br>18g agar                                            | 50:50<br>Tap:Deionised | 7.3     |

**Supplementary Table 5 | Antibiotics (and concentrations) used in this study.**

| Antibiotic      | Final concentration used for selection (µg/ml) |
|-----------------|------------------------------------------------|
| Apramycin       | 50                                             |
| Hygromycin      | 50                                             |
| Kanamycin       | 50                                             |
| Chloramphenicol | 30                                             |
| Nalidixic Acid  | 25                                             |

### Supplementary Note 1 | Compound structure elucidation data for 6-chlorogenistein

An isomer of 6-chlorogenistein – identified based on based on UV and MS characteristics, and likely to be a chlorination regioisomer - was identified in the LCMS trace but was not isolated due to low levels of production. The NMR data for 6-chlorogenistein has been reported previously<sup>6</sup>, and is in accordance with the data reported here.

### Supplementary Figure 11 | Chemical structure of 6-chlorogenistein

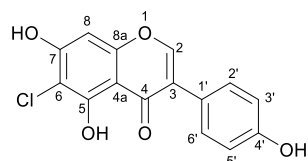

Molecular formula: C<sub>15</sub>H<sub>9</sub>O<sub>5</sub>Cl

Isolated yield: 2 mg

UV (PDA):  $\lambda_{\text{max}} = 259 \text{ nm}$

HRMS (ESI)  $m/z$ : calculated  $[M + H]^+ = 305.0211$ ; observed  $[M + H]^+ = 305.0212$ ,  $\Delta = 0.33$  ppm

### Supplementary Table 6 | NMR data for 6-chlorogenistein in CD<sub>3</sub>OD at 400 MHz for <sup>1</sup>H and 100 MHz for <sup>13</sup>C.

| Position | $\delta_{\text{C}}$ ppm | $\delta_{\text{H}}$ ppm (no. of protons, multiplicity, J in Hz) | HMBC           |
|----------|-------------------------|-----------------------------------------------------------------|----------------|
| 2        | 155.0                   | 8.2                                                             |                |
| 3        | 123.1                   |                                                                 | 2, 2', 6'      |
| 4        | 182.3                   |                                                                 | 2              |
| 4a       | 107.0                   |                                                                 | 8              |
| 5        | 162.2                   |                                                                 |                |
| 6        | 99.5                    |                                                                 | 8              |
| 7        | 162.0                   |                                                                 | 8              |
| 8        | 100.5                   | 6.4                                                             |                |
| 8a       | 155.0                   |                                                                 | 2              |
| 1'       | 125.2                   |                                                                 | 2, 3', 5'      |
| 2'       | 116.5                   | 6.8                                                             | 6'             |
| 3'       | 131.6                   | 7.4                                                             | 5'             |
| 4'       | 159.2                   |                                                                 | 2', 3', 5', 6' |

|    |       |     |    |
|----|-------|-----|----|
| 5' | 131.6 | 7.4 | 3' |
| 6' | 116.5 | 6.9 | 2' |

---

Supplementary Figure 12 | <sup>1</sup>H NMR spectrum (CD<sub>3</sub>OD, 400 MHz) for 6-chlorogenstein.

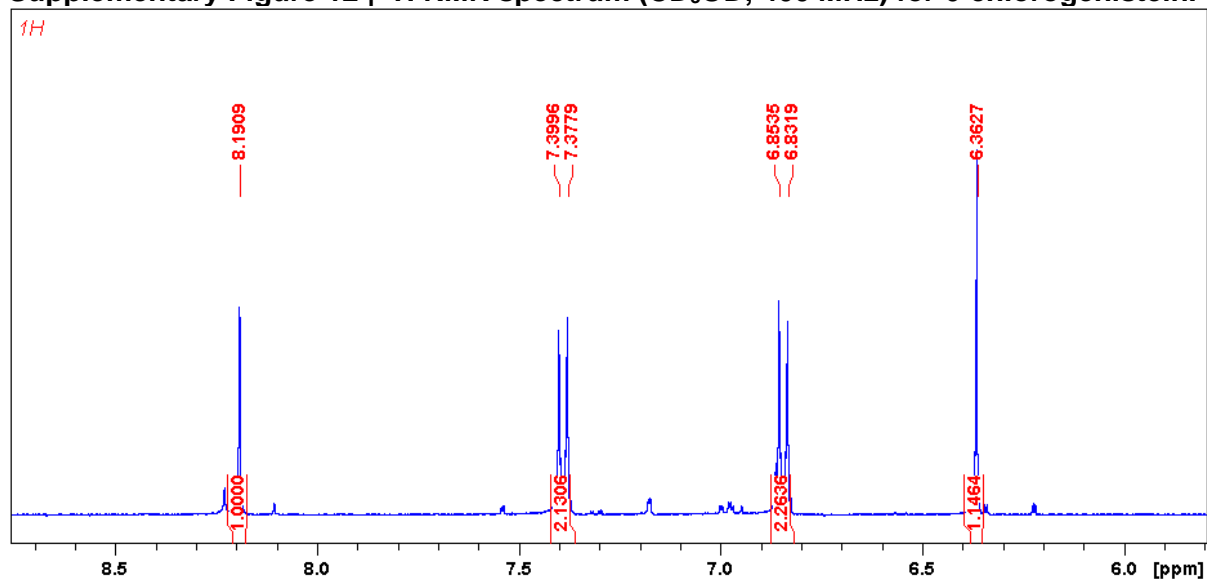

Supplementary Figure 13 | <sup>13</sup>C NMR spectrum (CD<sub>3</sub>OD, 100 MHz) for 6-chlorogenstein.

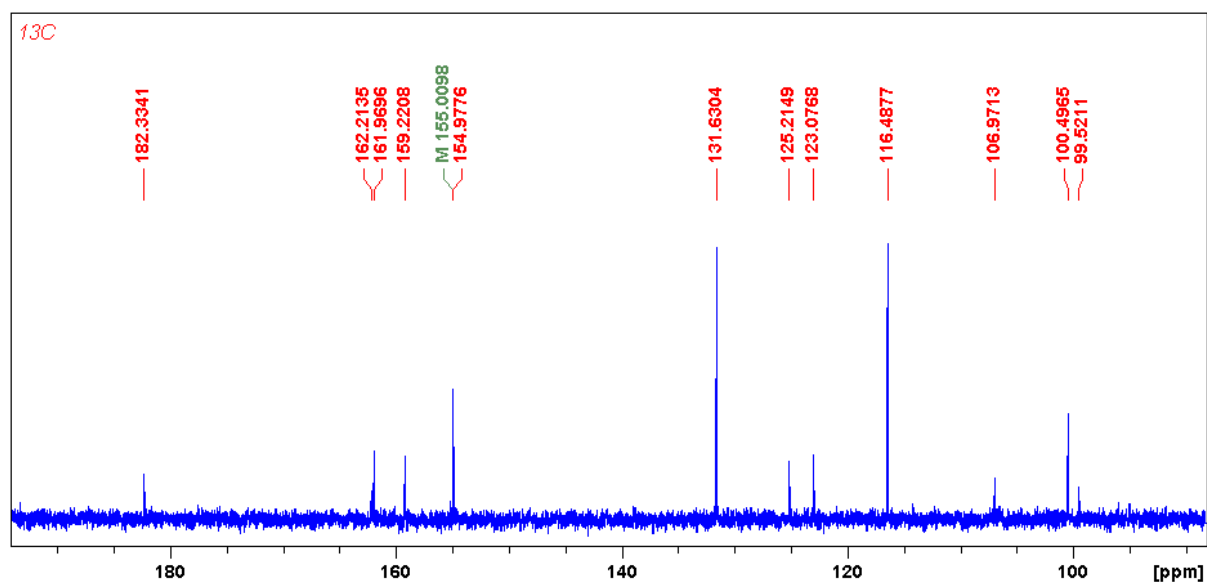

Supplementary Figure 14 | HSQC spectrum (CD<sub>3</sub>OD) for 6-chlorogenistein.

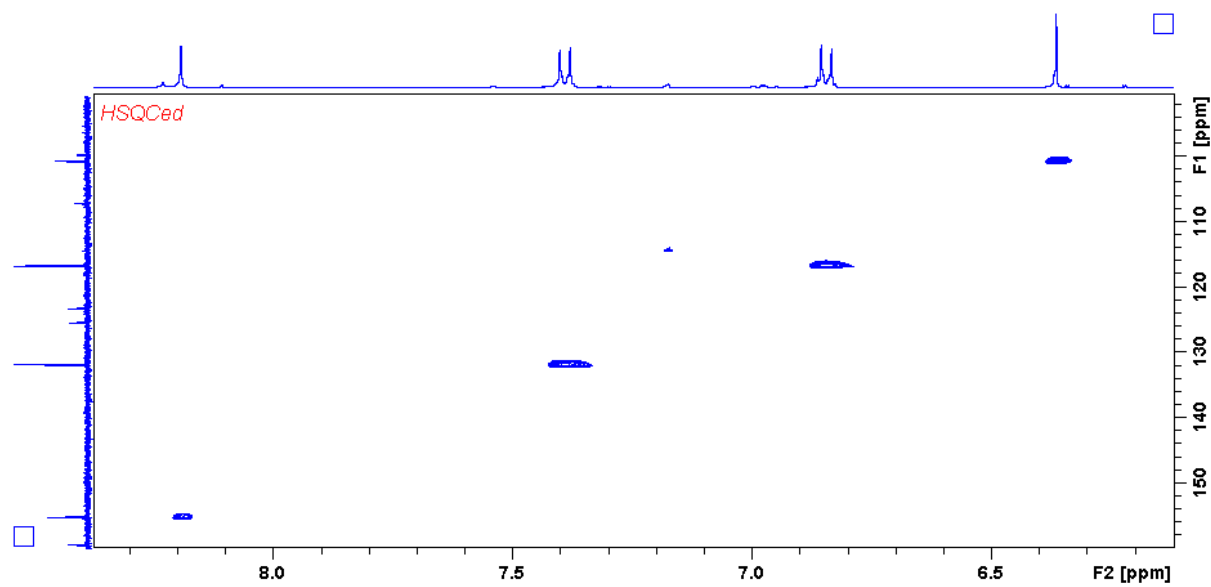

Supplementary Figure 15 | HMBC spectrum (CD<sub>3</sub>OD) for 6-chlorogenistein.

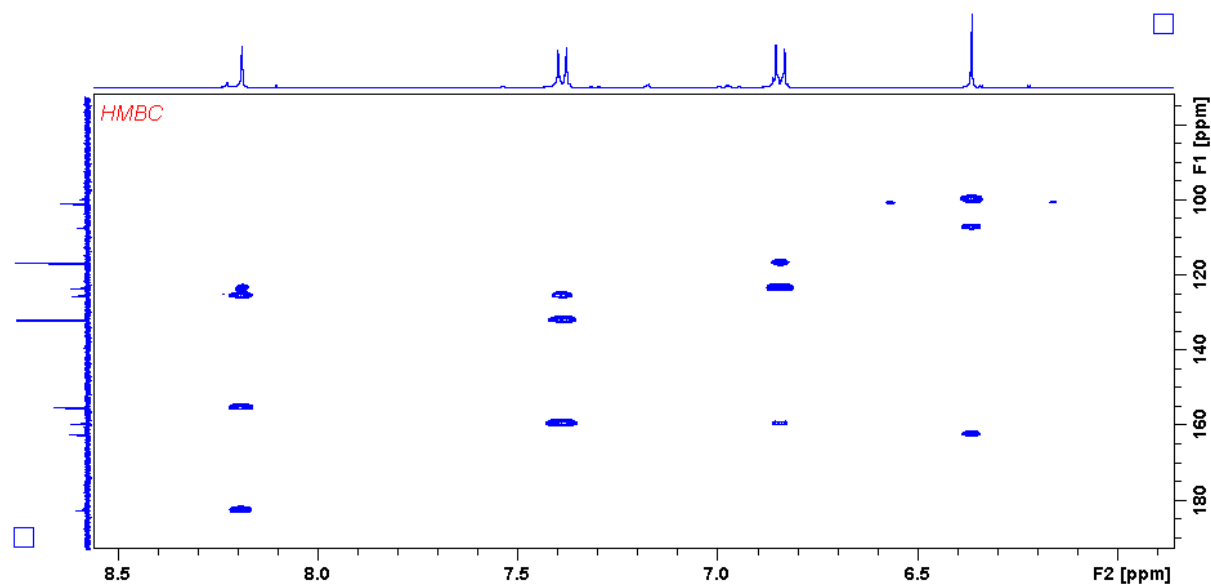

**Supplementary Note 2 | Formicapiridine A-F (1-6) and fasamycin F (13) structure elucidation data.**

**COMPOUND 1 (formicapiridine A)**

**Supplementary Figure 16 | Chemical structure of compound 1**

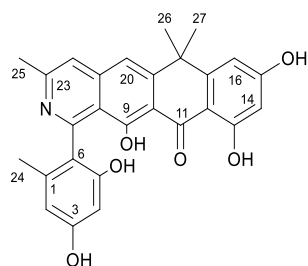

Molecular formula: C<sub>27</sub>H<sub>23</sub>NO<sub>6</sub>

Isolated yield: 1 mg

UV (PDA): λ<sub>max</sub> = 228, 249, 272, and 391 nm

Optical activity: [α]<sub>D</sub><sup>20</sup> = +9.890

HRMS (ESI) *m/z*: calculated [M + H]<sup>+</sup> = 458.1598; observed [M + H]<sup>+</sup> = 458.1600, Δ = 0.44 ppm

**Supplementary Table 7 | NMR data for compound 1 in CD<sub>3</sub>OD at 400 MHz for <sup>1</sup>H and 100 MHz for <sup>13</sup>C.**

| Position | δ <sub>C</sub> ppm | δ <sub>H</sub> ppm (no. of protons, multiplicity, J in Hz) | HMBC     | NOESY |
|----------|--------------------|------------------------------------------------------------|----------|-------|
| 1        | 138.8              |                                                            | 24       |       |
| 2        | 109.4              | 6.3 (1H, d, 1.64)                                          | 24       | 24    |
| 3        | not detected       |                                                            |          |       |
| 4        | 101.2              | 6.3 (1H, d, 1.64)                                          |          |       |
| 5        | 157.0              |                                                            |          |       |
| 6        | 120.9              |                                                            | 2, 4, 24 |       |
| 7        | 159.9              |                                                            |          |       |
| 8        | 118.6              |                                                            | 20, 22   |       |
| 9        | 167.5              |                                                            |          |       |
| 10       | 111.3              |                                                            | 20       |       |
| 11       | 191.6              |                                                            |          |       |
| 12       | 108.5              |                                                            | 14       |       |
| 13       | 167.7              |                                                            | 14       |       |

|    |       |                   |            |        |
|----|-------|-------------------|------------|--------|
| 14 | 102.5 | 6.3 (1H, d, 2.21) | 16         |        |
| 15 | 167.8 |                   |            |        |
| 16 | 107.9 | 6.7 (1H, d, 2.21) | 14         | 26, 27 |
| 17 | 155.7 |                   | 26, 27     |        |
| 18 | 40.7  |                   | 20, 26, 27 |        |
| 19 | 155.1 |                   | 26, 27     |        |
| 20 | 115.7 | 7.7 (1H, s)       | 22         | 26, 27 |
| 21 | 144.7 |                   |            |        |
| 22 | 121.3 | 7.7 (1H, s)       | 20, 25     | 25     |
| 23 | 152.6 |                   | 25         |        |
| 24 | 20.2  | 1.9 (3H, s)       |            | 2      |
| 25 | 22.1  | 2.7 (3H, s)       |            | 6      |
| 26 | 34.5  | 1.8 (3H, s)       | 27         | 16, 20 |
| 27 | 34.7  | 1.8 (3H, s)       | 26         | 16, 20 |

Supplementary Figure 17 | <sup>1</sup>H NMR spectrum (CD<sub>3</sub>OD, 400 MHz) for compound 1.

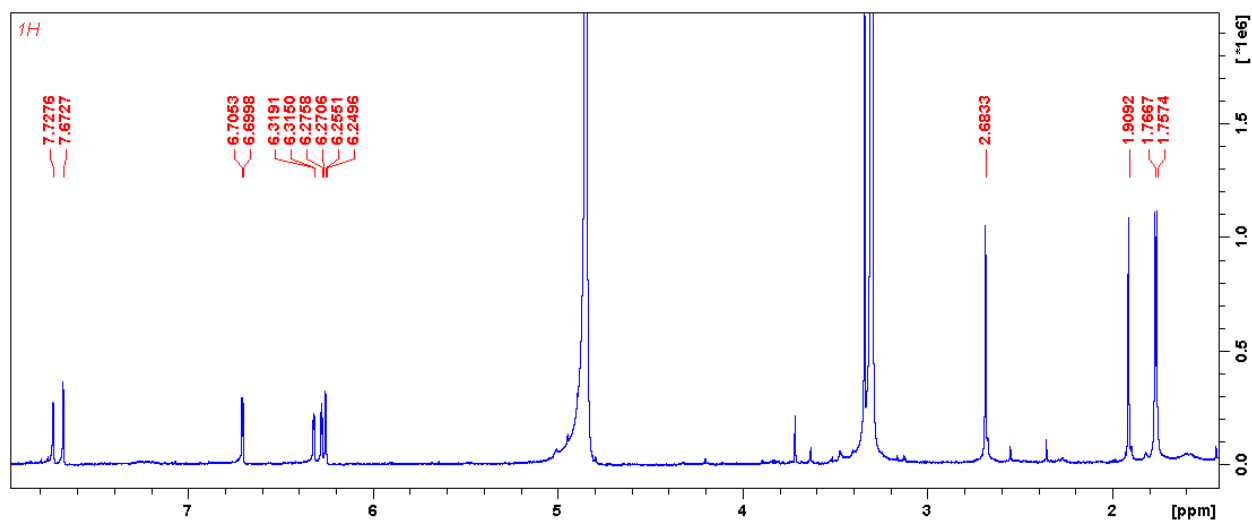



Supplementary Figure 18 |  $^{13}\text{C}$  NMR spectrum ( $\text{CD}_3\text{OD}$ , 100 MHz) for compound 1.

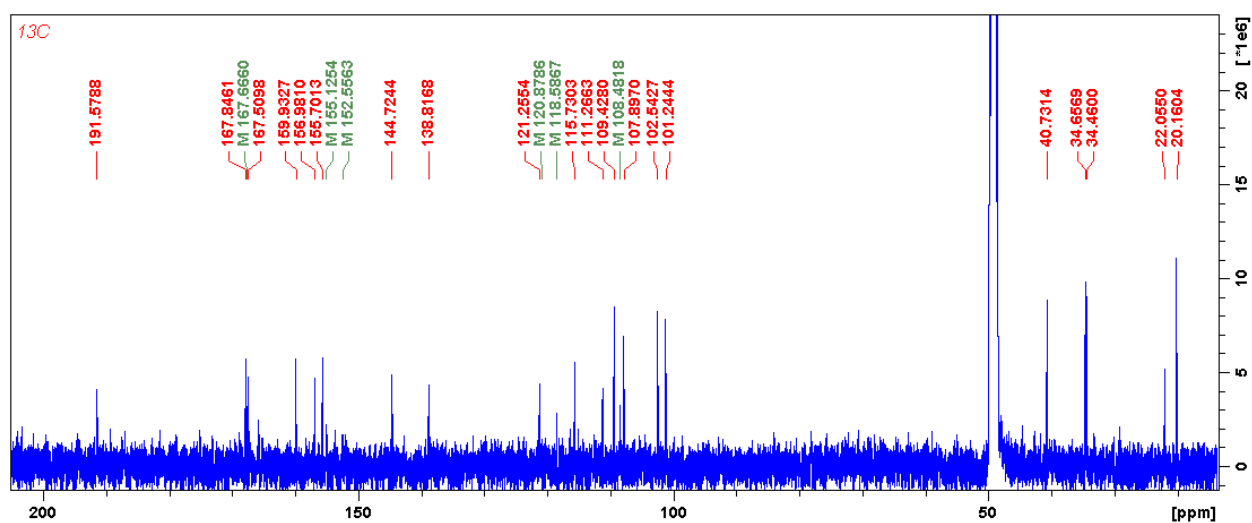

Supplementary Figure 19 | HSQC spectrum ( $\text{CD}_3\text{OD}$ ) for compound 1.

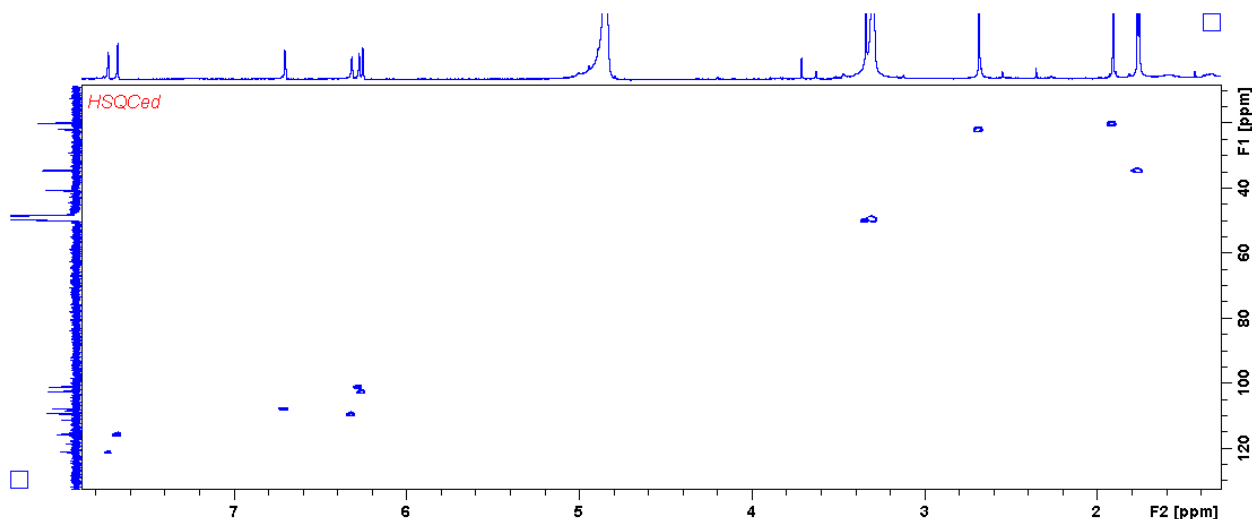

Supplementary Figure 20 | HMBC spectrum ( $\text{CD}_3\text{OD}$ ) for compound 1.

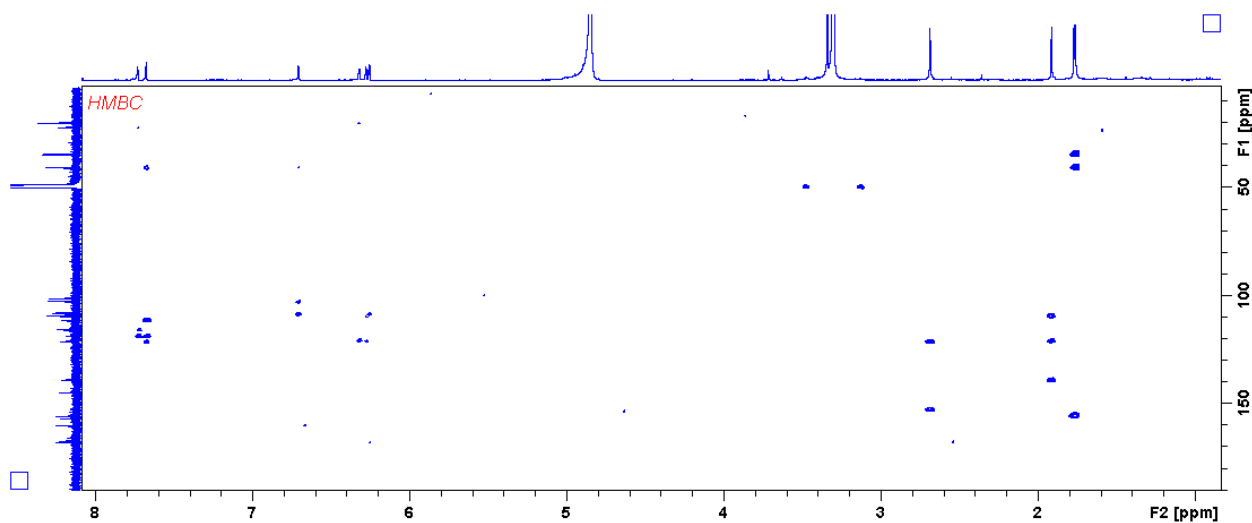

**Supplementary Figure 20 | NOESY spectrum (CD<sub>3</sub>OD) for compound 1.**

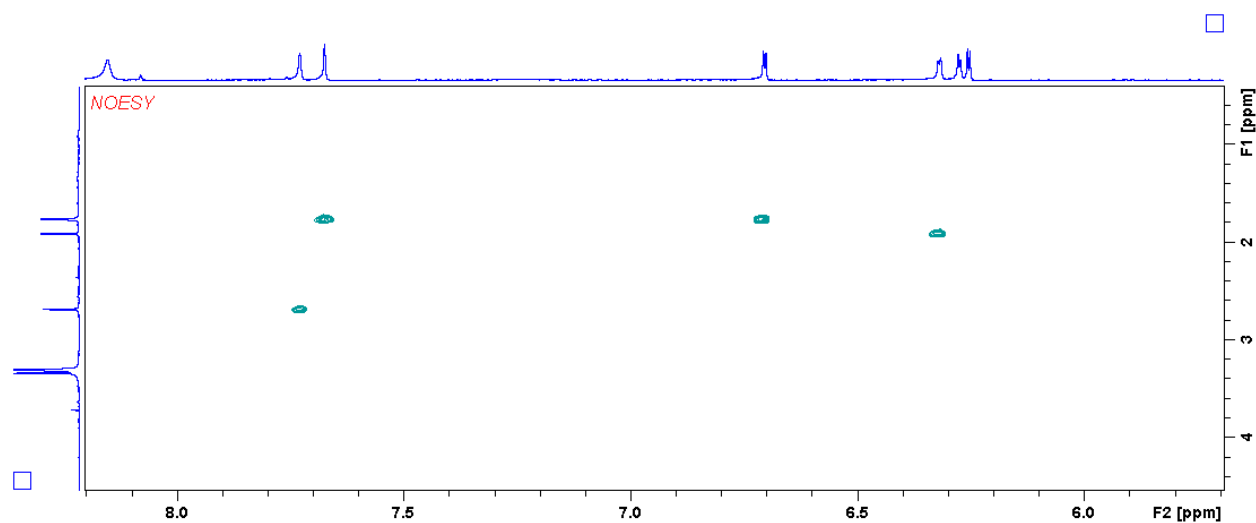

**COMPOUND 2 (formicaprydine B)**

**Supplementary Figure 22 | Chemical structure of compound 2**

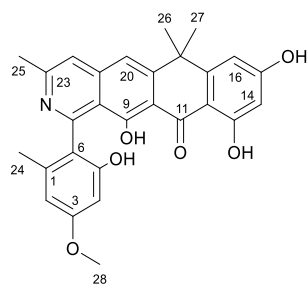

Molecular formula: C<sub>28</sub>H<sub>25</sub>NO<sub>6</sub>

Isolated yield: 1 mg

UV (PDA): λ<sub>max</sub> = 229, 249, 272, and 392 nm

Optical activity: [α]<sub>D</sub><sup>20</sup> = +7.692

HRMS (ESI) *m/z*: calculated [M + H]<sup>+</sup> = 472.1755; observed [M + H]<sup>+</sup> = 472.1753, Δ = -0.42 ppm.

**Supplementary Table 8 | NMR data for compound 2 in CD<sub>3</sub>OD at 400 MHz for <sup>1</sup>H and 100 MHz for <sup>13</sup>C.**

| Position | δ <sub>C</sub> ppm | δ <sub>H</sub> ppm (no. of protons, multiplicity, J in Hz) | <sup>1</sup> H – <sup>1</sup> H COSY | HMBC  | NOESY  |
|----------|--------------------|------------------------------------------------------------|--------------------------------------|-------|--------|
| 1        | 138.6              |                                                            |                                      | 24    |        |
| 2        | 107.7              | 6.4 (1H, d, 2.27)                                          | 4                                    | 4, 24 | 24, 28 |

|    |       |                   |    |                |        |
|----|-------|-------------------|----|----------------|--------|
| 3  | 161.7 |                   |    | 4, 28          |        |
| 4  | 99.9  | 6.3 (1H, d, 2.27) | 2  | 2              | 28     |
| 5  | 156.7 |                   |    | 4              |        |
| 6  | 124.9 |                   |    | 2, 4, 24       |        |
| 7  | 160.1 |                   |    |                |        |
| 8  | 118.6 |                   |    | 20, 22         |        |
| 9  | 167.3 |                   |    |                |        |
| 10 | 110.6 |                   |    | 20             |        |
| 11 | 191.8 |                   |    |                |        |
| 12 | 108.6 |                   |    | 14, 16         |        |
| 13 | 167.5 |                   |    | 14             |        |
| 14 | 102.5 | 6.2 (1H, d, 2.25) | 16 | 16             |        |
| 15 | 167.4 |                   |    | 14, 16         |        |
| 16 | 107.6 | 6.7 (1H, d, 2.25) | 14 | 14             | 26, 27 |
| 17 | 155.8 |                   |    | 26, 27         |        |
| 18 | 40.5  |                   |    | 16, 20, 26, 27 |        |
| 19 | 152.7 |                   |    | 26, 27         |        |
| 20 | 115.6 | 7.6 (1H, s)       |    | 22             | 26, 27 |
| 21 | 144.4 |                   |    | 20             |        |
| 22 | 119.9 | 7.6 (1H, s)       |    | 20, 25         | 25     |
| 23 | 155.5 |                   |    | 22, 25         |        |
| 24 | 20.4  | 1.9 (3H, s)       |    | 2              | 2      |
| 25 | 23.6  | 2.7 (3H, s)       |    | 22             | 22     |
| 26 | 34.6  | 1.8 (3H, s)       |    | 27             | 16, 20 |
| 27 | 34.8  | 1.7 (3H, s)       |    | 26             | 16, 20 |
| 28 | 55.8  | 3.8 (3H, s)       |    |                | 2, 4   |

---

Supplementary Figure 23 |  $^1\text{H}$  NMR spectrum ( $\text{CD}_3\text{OD}$ , 400 MHz) for compound 2.

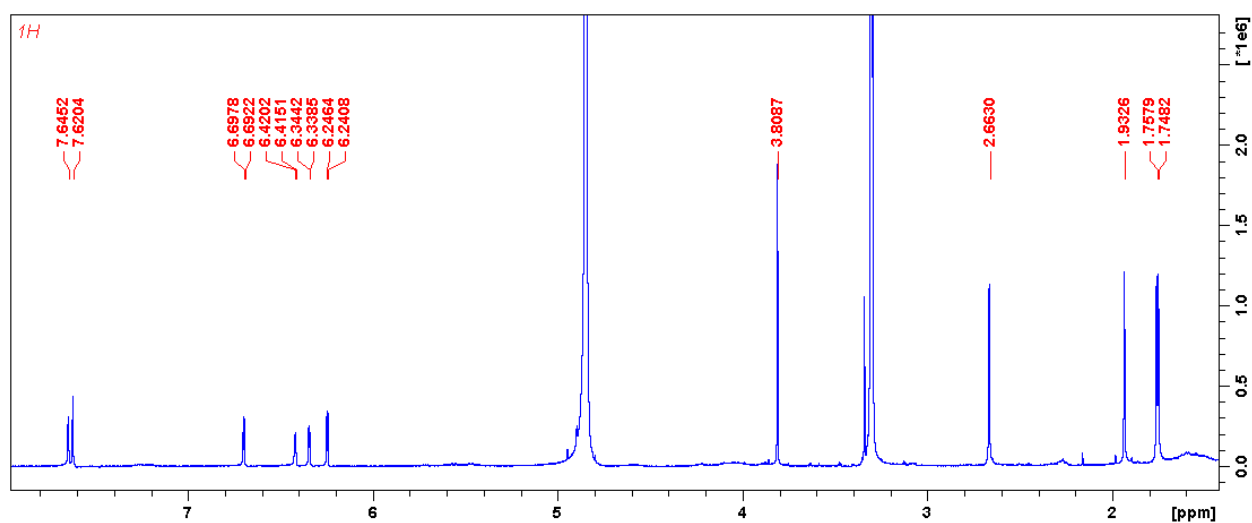

Supplementary Figure 24 |  $^{13}\text{C}$  NMR spectrum ( $\text{CD}_3\text{OD}$ , 100 MHz) for compound 2.

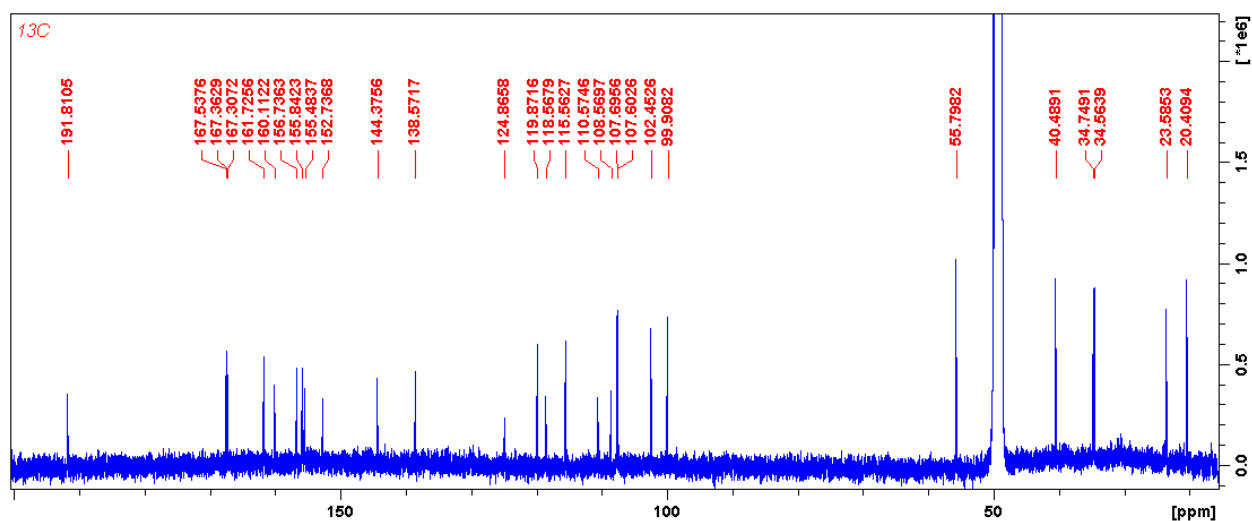

Supplementary Figure 25 | HSQC spectrum ( $\text{CD}_3\text{OD}$ ) for compound 2.

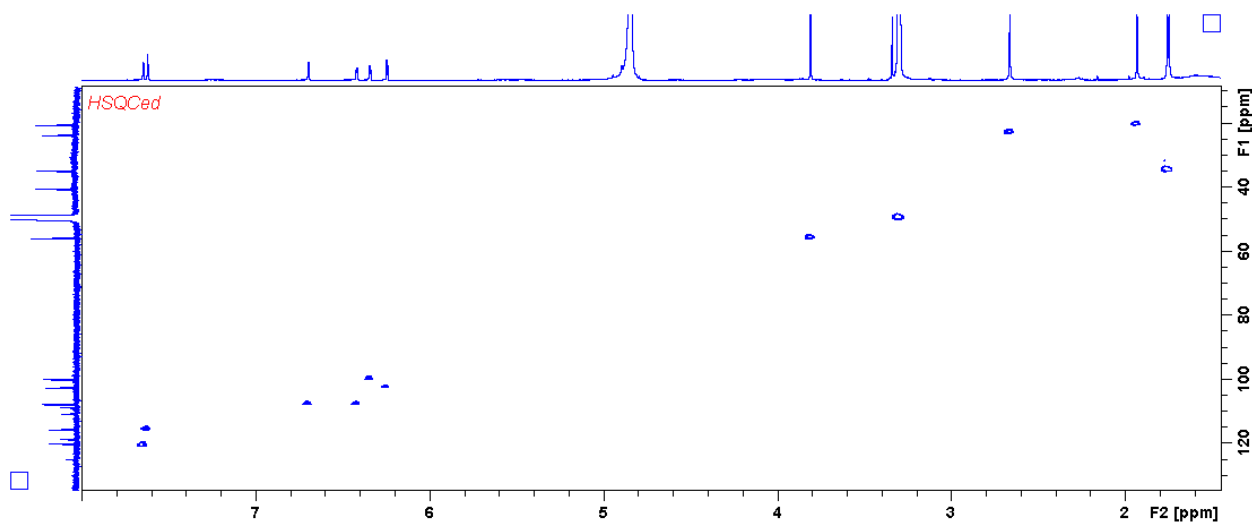

Supplementary Figure 26 | HMBC spectrum (CD<sub>3</sub>OD) for compound 2.

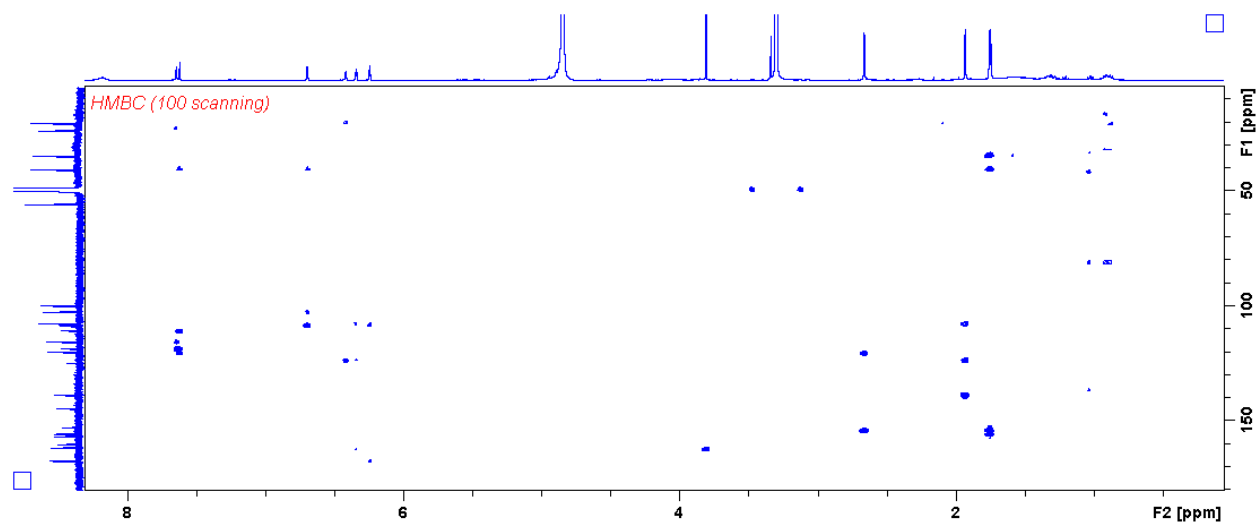

Supplementary Figure 27 | NOESY spectrum (CD<sub>3</sub>OD) for compound 2.

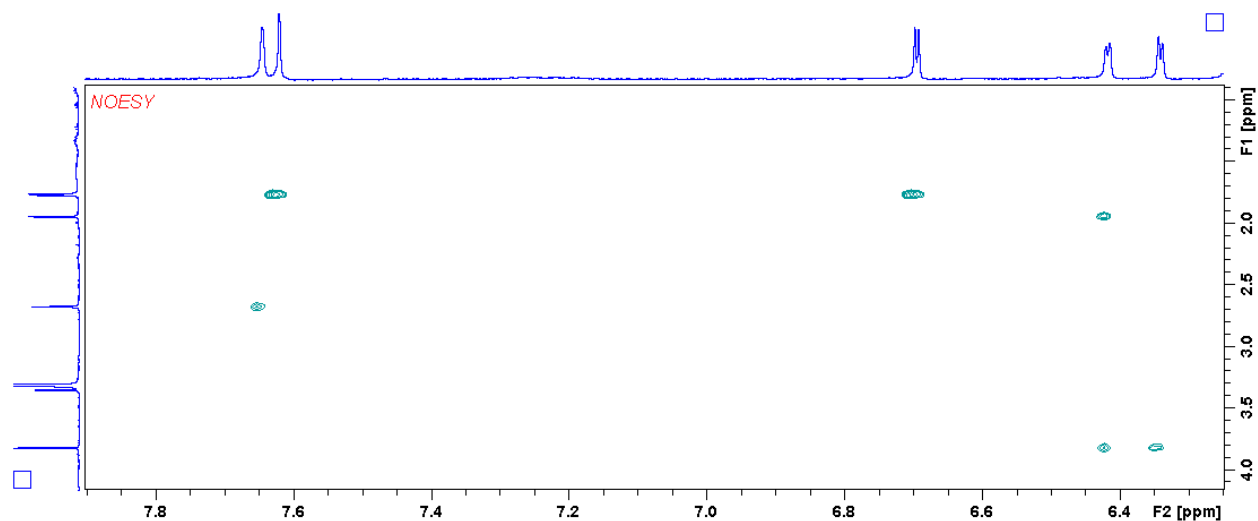

### COMPOUND 3 (formicaprydine C)

Supplementary Figure 28 | Chemical structure of compound 3

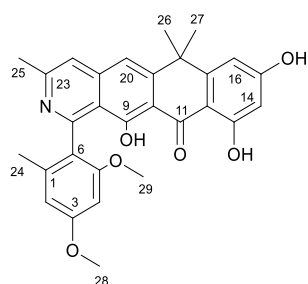

Molecular formula: C<sub>29</sub>H<sub>27</sub>NO<sub>6</sub>

Isolated yield: 2 mg

UV (PDA):  $\lambda_{\text{max}} = 228, 249, 272, \text{ and } 391 \text{ nm}$

Optical activity:  $[\alpha]_{\text{D}}^{20} = +8.791$

HRMS (ESI)  $m/z$ : calculated  $[M + H]^+ = 486.1911$ ; observed  $[M + H]^+ = 486.1905$ ,  $\Delta = -1.23$  ppm.

**Supplementary Table 9 | NMR data for compound 3 in CD<sub>3</sub>OD at 400 MHz for <sup>1</sup>H and 100 MHz for <sup>13</sup>C.**

| Position | $\delta_{\text{C}}$ ppm | $\delta_{\text{H}}$ ppm (no. of protons, multiplicity, J in Hz) | HMBC           | NOESY  |
|----------|-------------------------|-----------------------------------------------------------------|----------------|--------|
| 1        | 138.5                   |                                                                 | 25             |        |
| 2        | 107.7                   | 6.5 (1H, d, 2.33)                                               | 4, 24          | 28     |
| 3        | 162.4                   |                                                                 | 4, 28          |        |
| 4        | 97.0                    | 6.5 (1H, d, 2.33)                                               | 2              | 28, 29 |
| 5        | 159.7                   |                                                                 | 4, 29          |        |
| 6        | 125.1                   |                                                                 | 4, 25          |        |
| 7        | 161.0                   |                                                                 |                |        |
| 8        | 118.4                   |                                                                 | 20             |        |
| 9        | 167.2                   |                                                                 |                |        |
| 10       | 110.8                   |                                                                 | 20             |        |
| 11       | 191.9                   |                                                                 |                |        |
| 12       | 108.5                   |                                                                 | 14, 16         |        |
| 13       | 167.4                   |                                                                 | 14             |        |
| 14       | 102.5                   | 6.2 (1H, d, 2.30)                                               | 16             |        |
| 15       | 167.7                   |                                                                 | 16             |        |
| 16       | 107.8                   | 6.7 (1H, d, 2.30)                                               |                | 26, 27 |
| 17       | 155.8                   |                                                                 | 26, 27         |        |
| 18       | 40.6                    |                                                                 | 16, 20, 26, 27 |        |
| 19       | 153.6                   |                                                                 | 26, 27         |        |
| 20       | 115.7                   | 7.6 (1H, s)                                                     | 22             | 26, 27 |
| 21       | 144.4                   |                                                                 | 20             |        |
| 22       | 120.4                   | 7.6 (1H, s)                                                     | 20, 25         | 25     |
| 23       | 154.5                   |                                                                 | 22, 25         |        |
| 24       | 20.2                    | 1.9 (3H, s)                                                     | 2              | 2      |
| 25       | 23.1                    | 2.6 (3H, s)                                                     | 22             | 22     |
| 26       | 34.6                    | 1.7 (3H, s)                                                     | 27             | 16, 20 |

|    |      |             |    |        |
|----|------|-------------|----|--------|
| 27 | 34.6 | 1.8 (3H, s) | 26 | 16, 20 |
| 28 | 56.0 | 3.9 (3H, s) |    | 2, 4   |
| 29 | 56.3 | 3.6 (3H, s) |    | 4      |

---

Supplementary Figure 29 |  $^1\text{H}$  NMR spectrum ( $\text{CD}_3\text{OD}$ , 400 MHz) for compound 3.

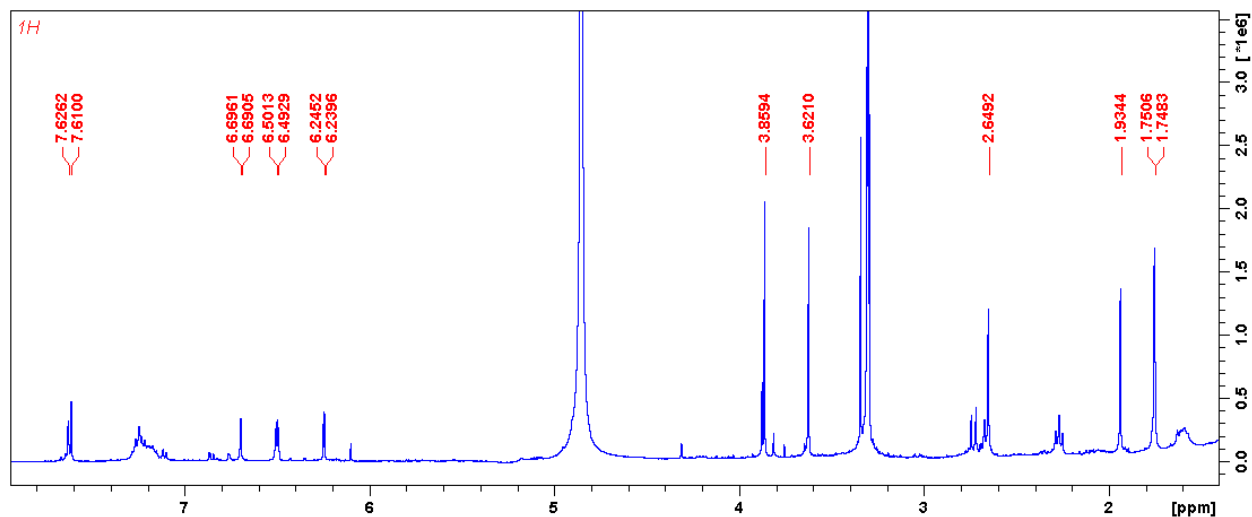

Supplementary Figure 30 |  $^{13}\text{C}$  NMR spectrum ( $\text{CD}_3\text{OD}$ , 100 MHz) for compound 3.

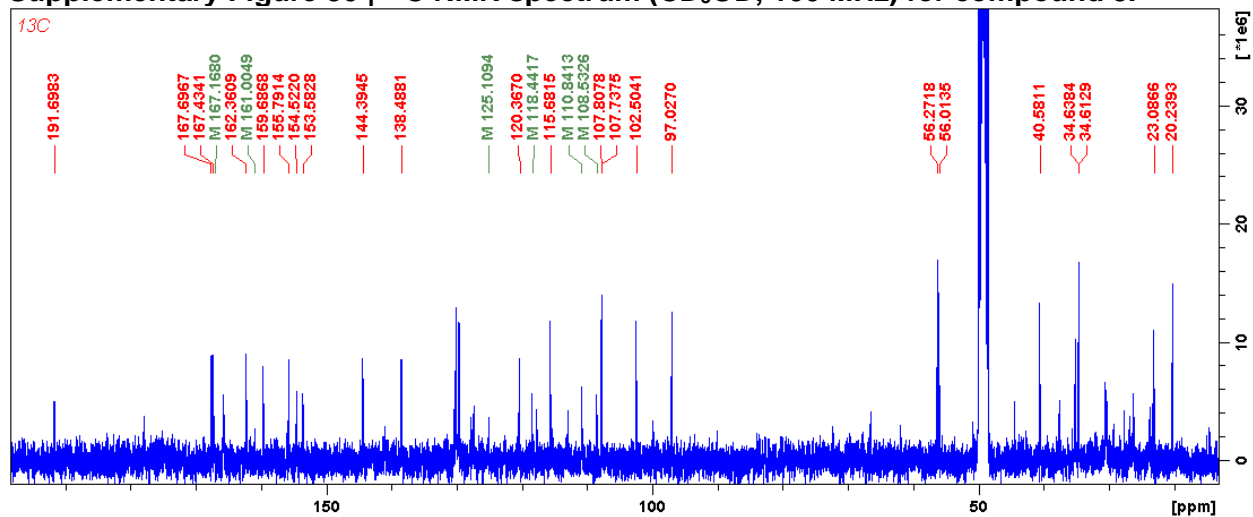

Supplementary Figure 31 | HSQC spectrum ( $\text{CD}_3\text{OD}$ ) for compound 3.

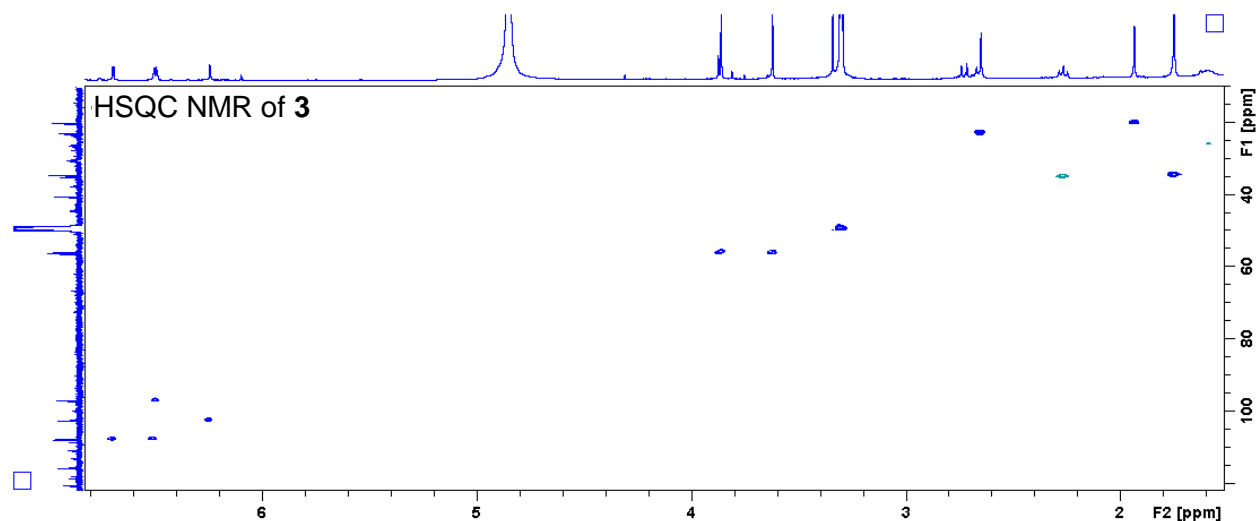

Supplementary Figure 32 | HMBC spectrum ( $\text{CD}_3\text{OD}$ ) for compound 3.

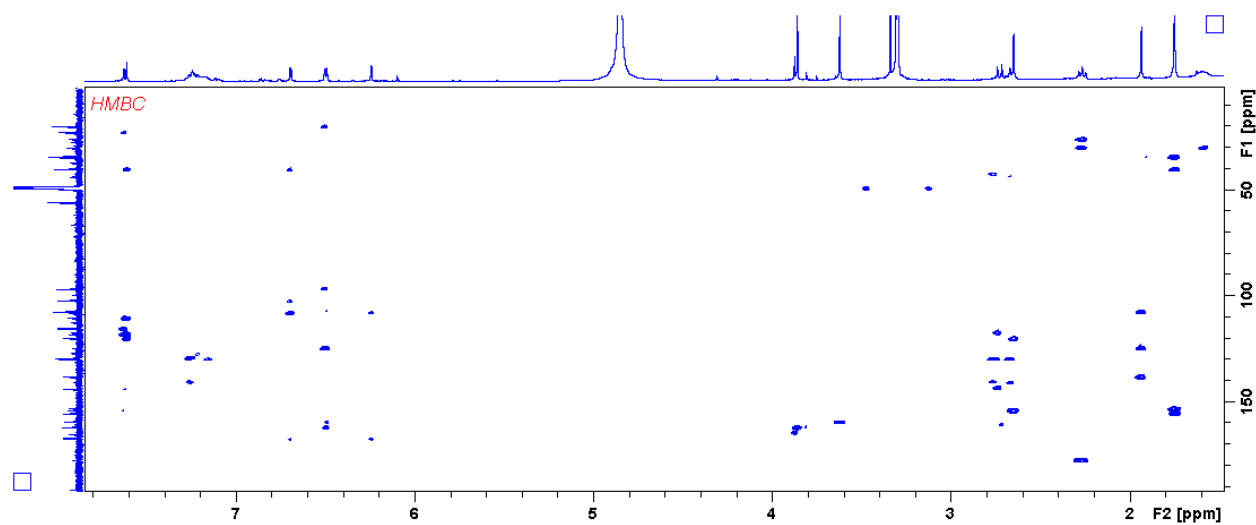



**Supplementary Figure 33 | NOESY spectrum (CD<sub>3</sub>OD) for compound 3.**

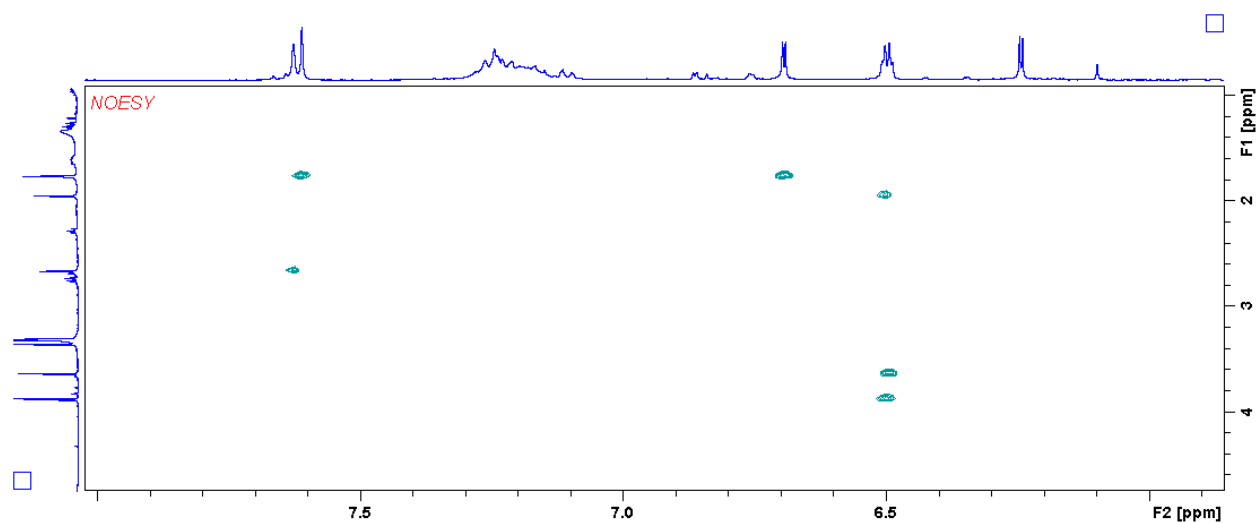

**COMPOUND 4 (formicaprydine D)**

**Supplementary Figure 34 | Chemical structure of compound 4**

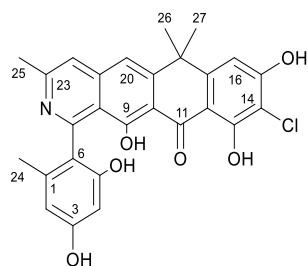

Molecular formula: C<sub>27</sub>H<sub>22</sub>NO<sub>6</sub>Cl

Isolated yield: 0.7 mg

UV (PDA): λ<sub>max</sub> = 228, 252, and 391 nm

Optical activity: [α]<sub>D</sub><sup>20</sup> = +10.989

HRMS (ESI) *m/z*: calculated [M + H]<sup>+</sup> = 492.1218; observed [M + H]<sup>+</sup> = 492.1208, Δ = 2.03 ppm.

**Supplementary Table 10 | NMR data for compound 4 in CD<sub>3</sub>OD at 400 MHz for <sup>1</sup>H.**

| Position | δ <sub>H</sub> ppm (no. of protons, multiplicity, J in Hz) | NOESY  |
|----------|------------------------------------------------------------|--------|
| 2        | 6.2929 (1H, d, 2.32)                                       | 24     |
| 4        | 6.2511 (1H, d, 2.32)                                       |        |
| 16       | 6.8255 (1H, s)                                             | 26, 27 |

|    |                |        |
|----|----------------|--------|
| 20 | 7.5921 (1H, s) | 26, 27 |
| 22 | 7.5921 (1H, s) | 25     |
| 24 | 1.8789 (3H, s) | 2      |
| 25 | 2.6475 (3H, s) | 22     |
| 26 | 1.7456 (3H, s) | 16, 20 |
| 27 | 1.7456 (3H, s) | 16, 20 |

Supplementary Figure 35 |  $^1\text{H}$  NMR spectrum ( $\text{CD}_3\text{OD}$ , 400 MHz) for compound 4.

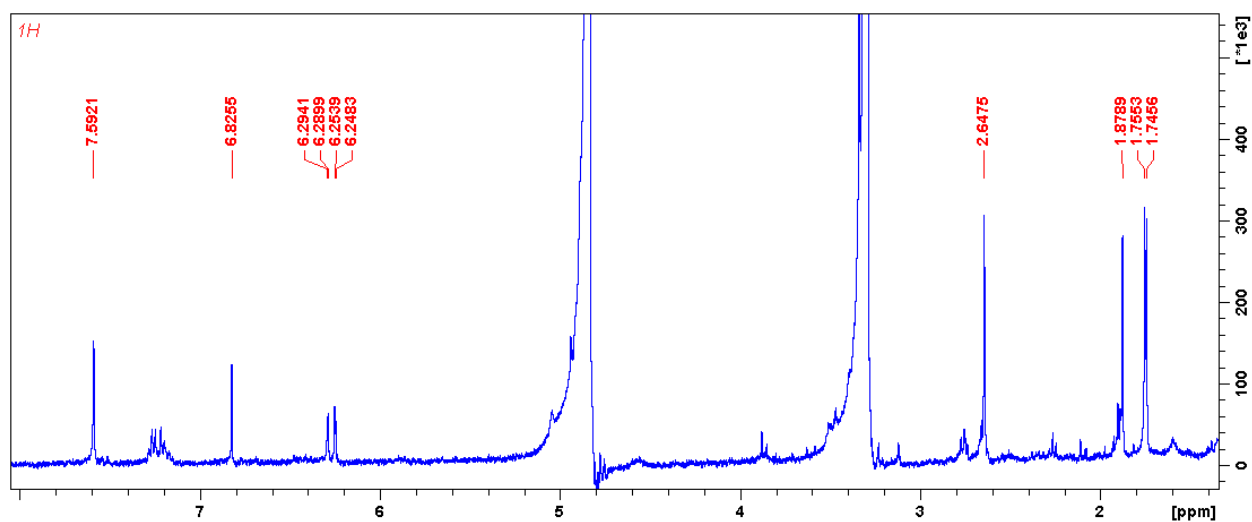

Supplementary Figure 36 | NOESY spectrum ( $\text{CD}_3\text{OD}$ ) for compound 4.

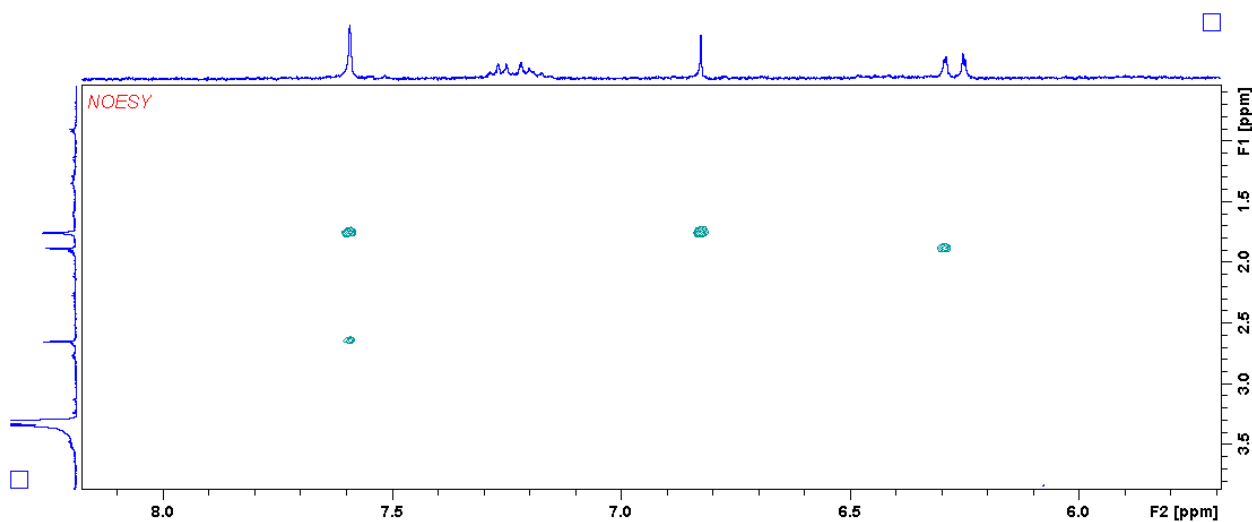

## COMPOUND 5 (formicapryidine E)

### Supplementary Figure 37 | Chemical structure of compound 5

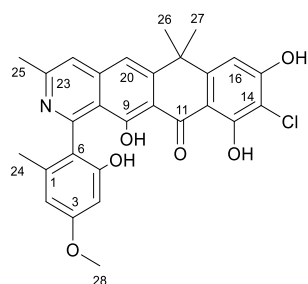

Molecular formula: C<sub>28</sub>H<sub>24</sub>NO<sub>6</sub>Cl

Isolated yield: 1 mg

UV (PDA):  $\lambda_{\max}$  = 218, 252, and 391 nm

Optical activity:  $[\alpha]_D^{20}$  = +12.088

HRMS (ESI) *m/z*: calculated  $[M + H]^+$  = 506.1365; observed  $[M + H]^+$  = 506.1362,  $\Delta$  = -0.59 ppm.

### Supplementary Table 11 | NMR data for compound 5 in CD<sub>3</sub>OD at 400 MHz for <sup>1</sup>H and 100 MHz for <sup>13</sup>C.

| Position | $\delta_C$ ppm | $\delta_H$ ppm (no. of protons, multiplicity, J in Hz) | HMBC   | NOESY  |
|----------|----------------|--------------------------------------------------------|--------|--------|
| 1        | 138.8          |                                                        | 24     |        |
| 2        | 107.8          | 6.4 (1H, d, 2.22)                                      | 24     | 24, 28 |
| 3        | 162.4          |                                                        | 28     |        |
| 4        | 99.9           | 6.3 (1H, d, 2.22)                                      |        | 28     |
| 5        | 156.9          |                                                        |        |        |
| 6        | 122.7          |                                                        | 2, 24  |        |
| 7        | 159.9          |                                                        |        |        |
| 8        | 118.6          |                                                        | 20, 22 |        |
| 9        | 162.3          |                                                        |        |        |
| 10       | 111.0          |                                                        | 20     |        |
| 11       | 191.6          |                                                        |        |        |
| 12       | 109.0          |                                                        | 16     |        |
| 13       | 165.2          |                                                        |        |        |
| 14       | 97.3           |                                                        |        |        |
| 15       | 163.0          |                                                        |        |        |

|    |       |             |                |        |
|----|-------|-------------|----------------|--------|
| 16 | 107.5 | 6.8 (1H, s) |                | 26, 27 |
| 17 | 154.1 |             | 26, 27         |        |
| 18 | 40.5  |             | 16, 20, 26, 27 |        |
| 19 | 153.1 |             | 26, 27         |        |
| 20 | 115.9 | 7.7 (1H, s) | 22             | 26, 27 |
| 21 | 144.8 |             |                |        |
| 22 | 121.0 | 7.7 (1H, s) | 20, 25         | 25     |
| 23 | 153.7 |             | 25             |        |
| 24 | 20.3  | 1.9 (3H, s) | 22             | 2      |
| 25 | 22.5  | 2.7 (3H, s) |                | 22     |
| 26 | 34.4  | 1.7 (3H, s) | 27             | 16, 20 |
| 27 | 34.6  | 1.7 (3H, s) | 26             | 16, 20 |
| 28 | 55.9  | 3.8 (3H, s) |                | 2, 4   |

Supplementary Figure 38 |  $^1\text{H}$  NMR spectrum ( $\text{CD}_3\text{OD}$ , 400 MHz) for compound 5.

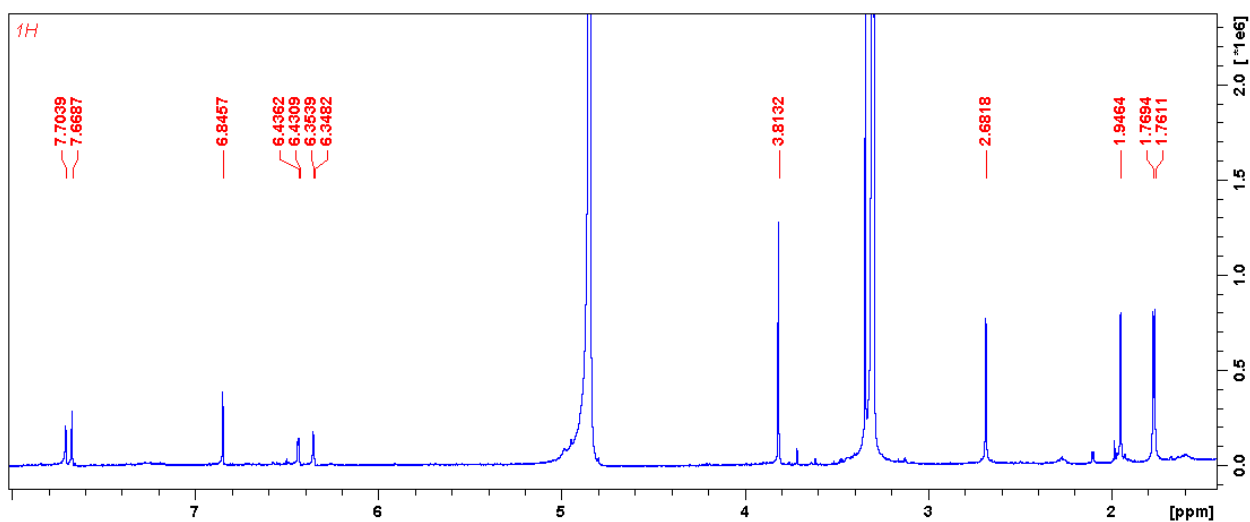

Supplementary Figure 39 |  $^{13}\text{C}$  NMR spectrum ( $\text{CD}_3\text{OD}$ , 100 MHz) for compound 5.

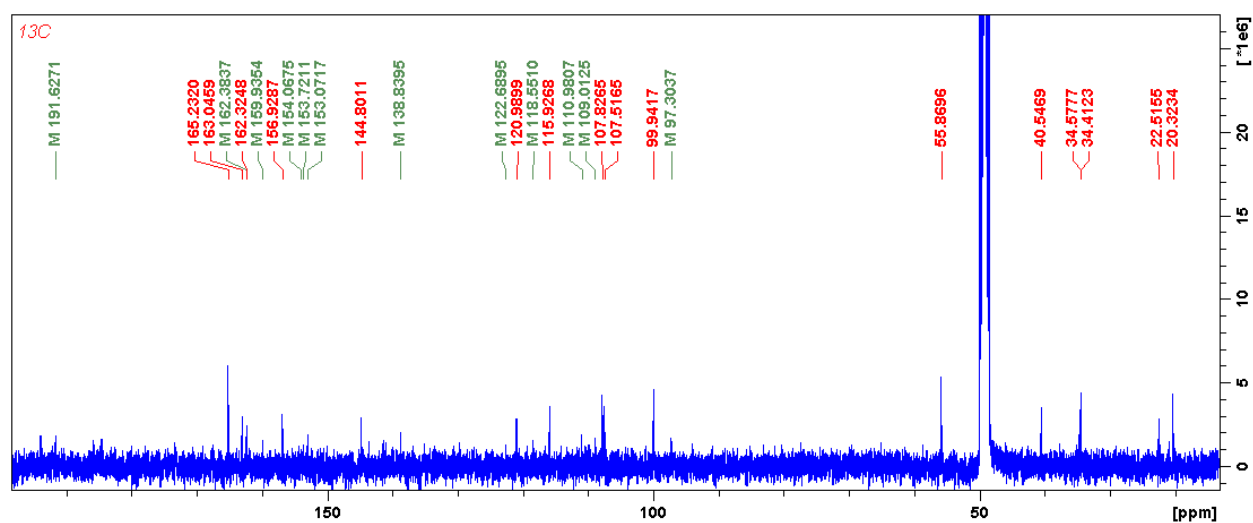

Supplementary Figure 40 | HSQC spectrum ( $\text{CD}_3\text{OD}$ ) for compound 5.

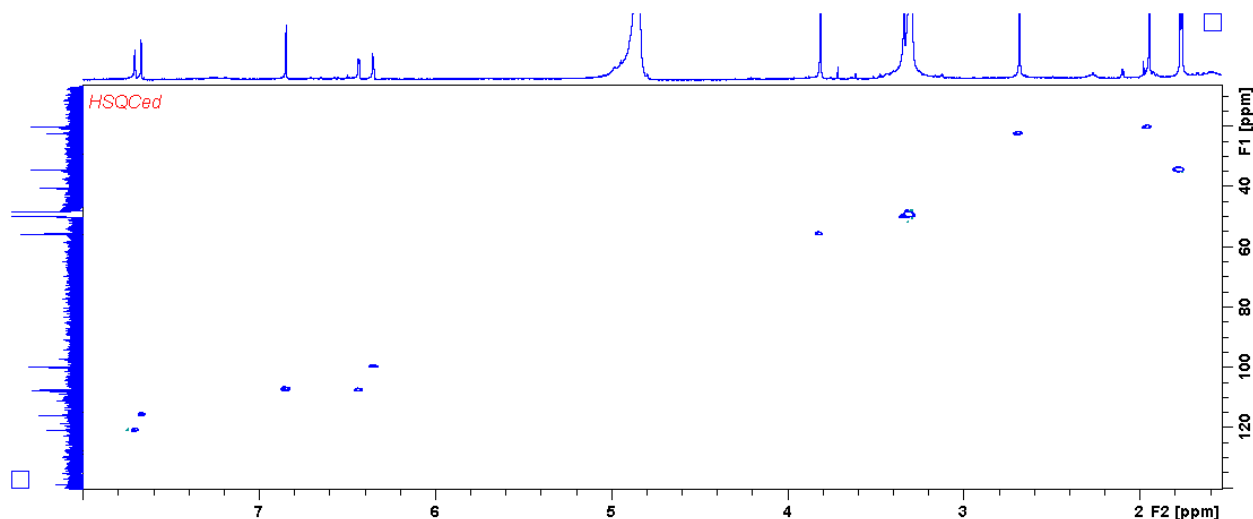

Supplementary Figure 41 | HMBC spectrum ( $\text{CD}_3\text{OD}$ ) for compound 5.

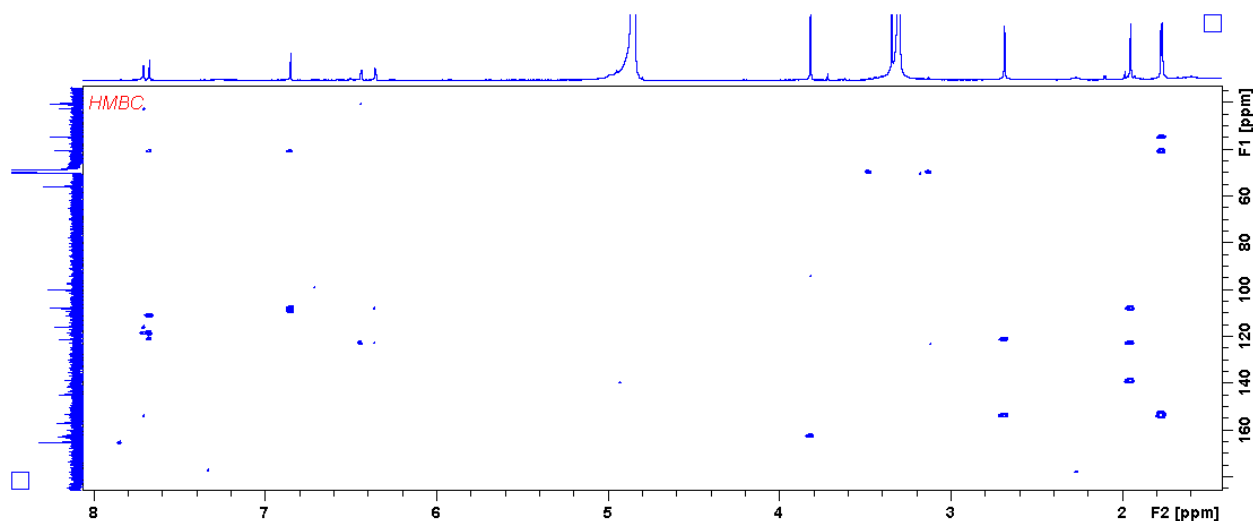

### Supplementary Figure 42 | NOESY spectrum (CD<sub>3</sub>OD) for compound 5.

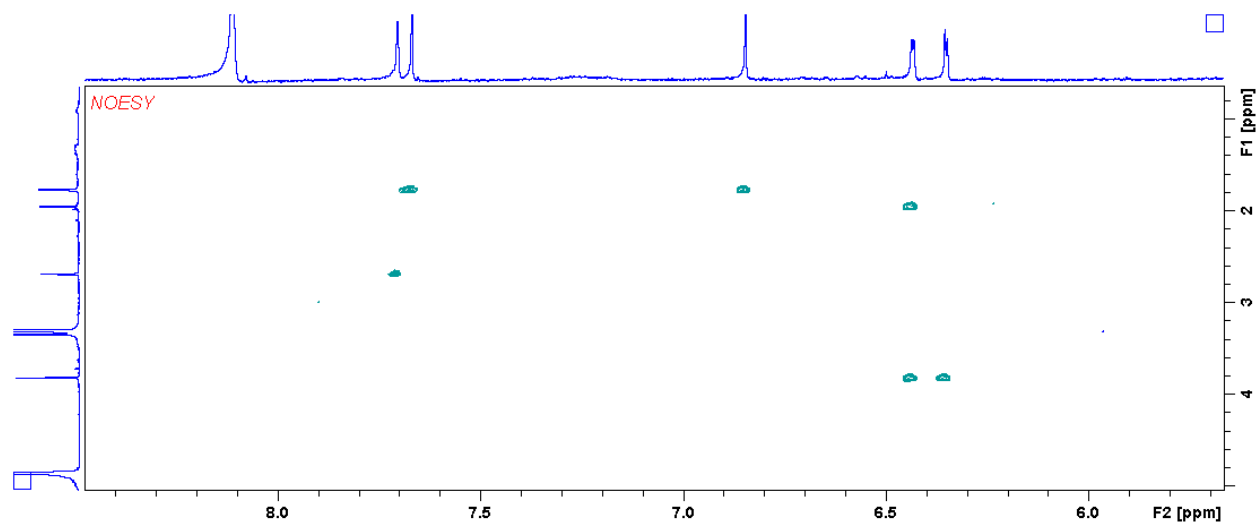

### COMPOUND 6 (formicaprydine F)

#### Supplementary Figure 43 | Chemical structure of compound 6

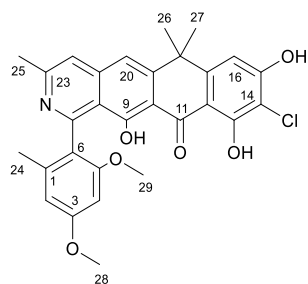

Molecular formula: C<sub>29</sub>H<sub>26</sub>NO<sub>6</sub>Cl

Isolated yield: 0.6 mg

UV (PDA):  $\lambda_{\text{max}}$  = 231, 252, and 391 nm

Optical activity:  $[\alpha]_D^{20}$  = +12.821

HRMS (ESI)  $m/z$ : calculated  $[M + H]^+$  = 520.1521; observed  $[M + H]^+$  = 520.1525,  $\Delta$  = 0.77 ppm.

#### Supplementary Table 12 | NMR data for compound 6 in CD<sub>3</sub>OD at 400 MHz for <sup>1</sup>H.

| Position | $\delta_H$ ppm (no. of protons, multiplicity, J in Hz) | NOESY  |
|----------|--------------------------------------------------------|--------|
| 2        | 6.4915 (1H, d, 2.33)                                   | 24     |
| 4        | 6.4834 (1H, d, 2.33)                                   | 29     |
| 16       | 6.833                                                  | 26, 27 |

|    |                |        |
|----|----------------|--------|
| 20 | 7.5951         | 26, 27 |
| 22 | 7.5863         | 25     |
| 24 | 1.9243 (3H, s) | 2      |
| 25 | 2.6384 (3H, s) | 22     |
| 26 | 1.7491 (3H, s) | 16, 20 |
| 27 | 1.7491 (3H, s) | 16, 20 |
| 28 | 3.8568 (3H, s) | 2      |
| 29 | 3.6116 (3H, s) | 4      |

Supplementary Figure 44 |  $^1\text{H}$  NMR spectrum ( $\text{CD}_3\text{OD}$ , 400 MHz) for compound 6.

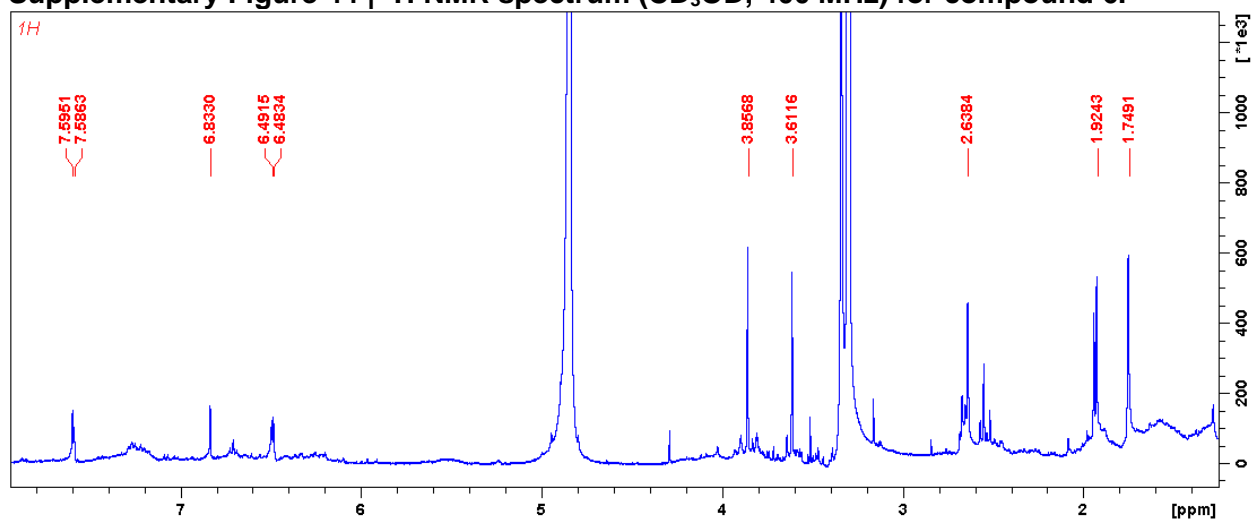

Supplementary Figure 45 | NOESY spectrum ( $\text{CD}_3\text{OD}$ ) for compound 6.

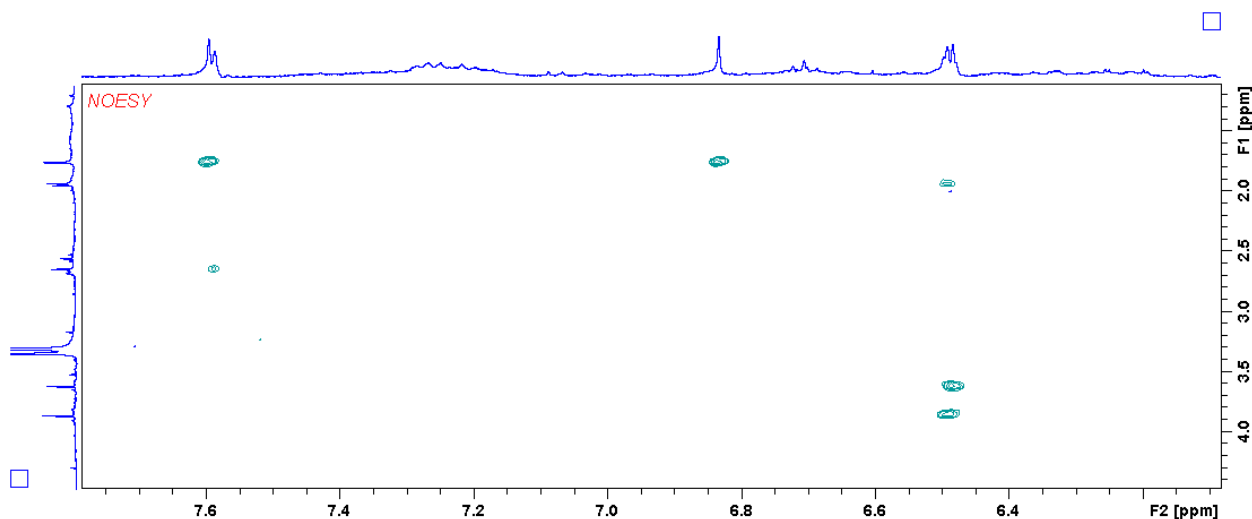

**COMPOUND 15 (fasamycin F)****Supplementary Figure 46 | Chemical structure of compound 13**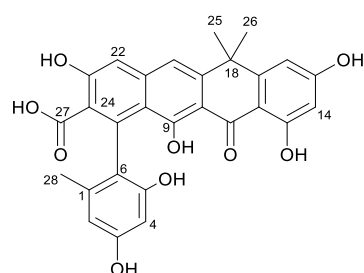

Molecular formula: C<sub>28</sub>H<sub>22</sub>O<sub>9</sub>

Isolated yield: 3.4 mg

UV (PDA): λ<sub>max</sub> = 247, 287, 353, and 414 nm

HRMS (ESI) *m/z*: calculated [M + H]<sup>+</sup> = 503.1337; observed [M + H]<sup>+</sup> = 503.1326, Δ = -0.29 ppm.

**Supplementary Table 13 | NMR data for compound 13 in CD<sub>3</sub>OD at 400 MHz for <sup>1</sup>H and 100 MHz for <sup>13</sup>C.**

| Position | δ <sub>c</sub> ppm | δ <sub>H</sub> ppm (no. of protons, multiplicity, J in Hz) | COSEY | HMBC   | NOESY |
|----------|--------------------|------------------------------------------------------------|-------|--------|-------|
| 1        | 139.56             |                                                            |       | 28     |       |
| 2        | 108.89             | 6.2 (1H, d, 2.30)                                          | 4     | 4, 28  | 28    |
| 3        | 158.20             |                                                            |       |        |       |
| 4        | 100.90             | 6.2 (1H, d, 2.30)                                          | 2     | 2      |       |
| 5        | 156.17             |                                                            |       | 4      |       |
| 6        | 121.28             |                                                            |       | 2, 28  |       |
| 7        | 138.31             |                                                            |       |        |       |
| 8        | 117.68             |                                                            |       | 20, 22 |       |
| 9        | 167.74             |                                                            |       |        |       |
| 10       | 108.24             |                                                            |       | 20     |       |
| 11       | 191.77             |                                                            |       |        |       |
| 12       | 108.75             |                                                            |       | 16     |       |
| 13       | 166.89             |                                                            |       | 14     |       |
| 14       | 102.25             | 6.2 (1H, d, 2.22)                                          | 16    | 16     |       |
| 15       | 166.70             |                                                            |       | 14, 16 |       |



|    |        |                   |    |                |        |
|----|--------|-------------------|----|----------------|--------|
| 16 | 107.21 | 6.6 (1H, d, 2.22) | 14 | 14             | 25, 26 |
| 17 | 155.87 |                   |    | 25, 26         |        |
| 18 | 39.96  |                   |    | 16, 20, 25, 26 |        |
| 19 | 147.72 |                   |    | 25, 26         |        |
| 20 | 115.95 | 7.3 (1H, s)       |    | 22             | 25, 26 |
| 21 | 142.60 |                   |    |                |        |
| 22 | 110.64 | 7.1 (1H, s)       |    | 20             |        |
| 23 | 157.09 |                   |    | 22             |        |
| 24 | 128.39 |                   |    | 22             |        |
| 25 | 34.67  | 1.7 (3H, s)       |    | 26             | 16, 20 |
| 26 | 34.84  | 1.7 (3H, s)       |    | 25             | 16, 20 |
| 27 | 171.95 |                   |    |                |        |
| 28 | 20.86  | 1.9 (3H, s)       |    | 2              | 2      |

Supplementary Figure 47 | <sup>1</sup>H NMR spectrum (CD<sub>3</sub>OD, 400 MHz) for compound 13.

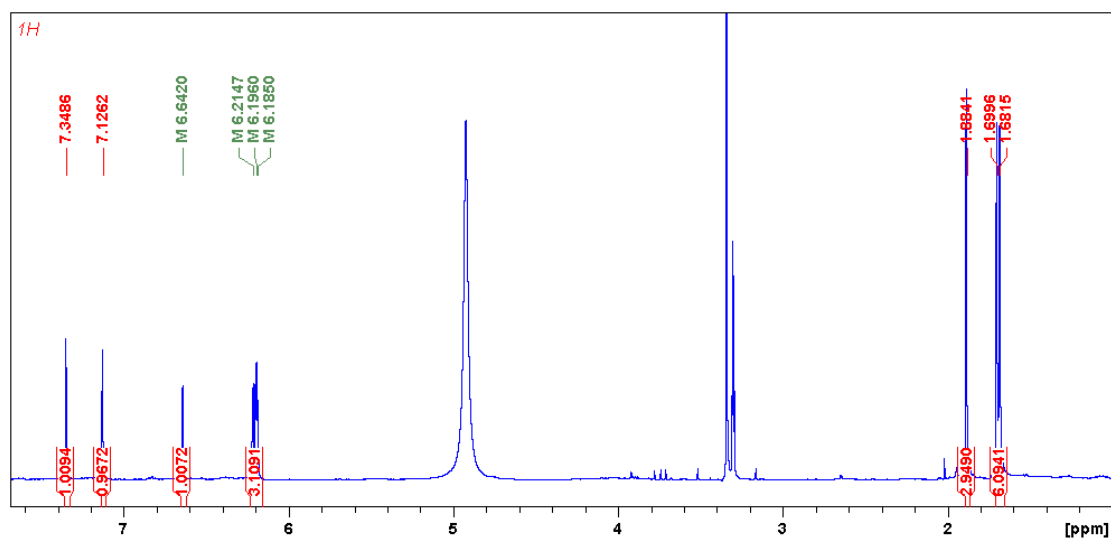

Supplementary Figure 48 |  $^{13}\text{C}$  NMR spectrum ( $\text{CD}_3\text{OD}$ , 100 MHz) for compound 13.

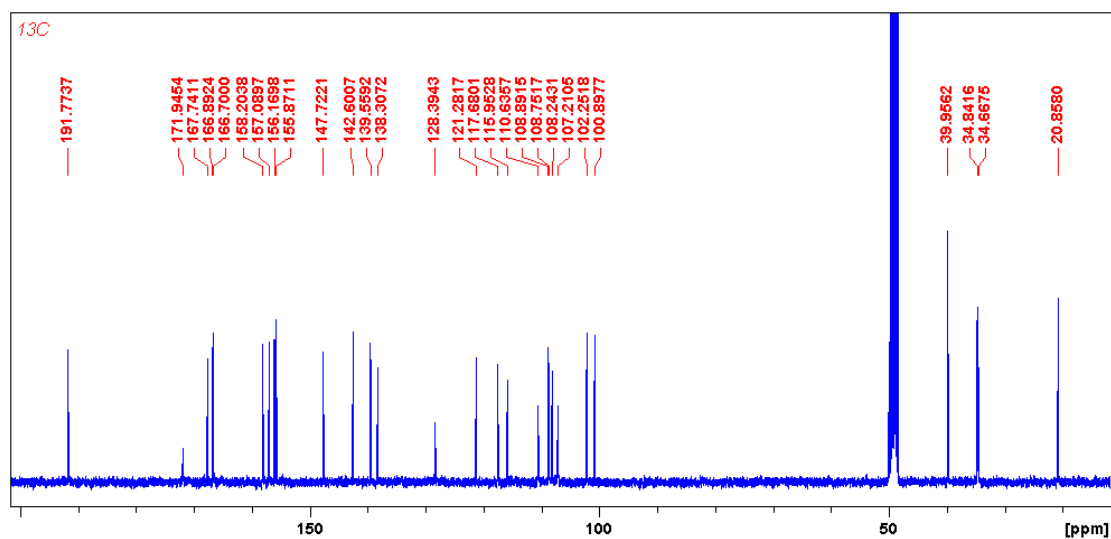

Supplementary Figure 49 | HSQC spectrum ( $\text{CD}_3\text{OD}$ ) for compound 13.

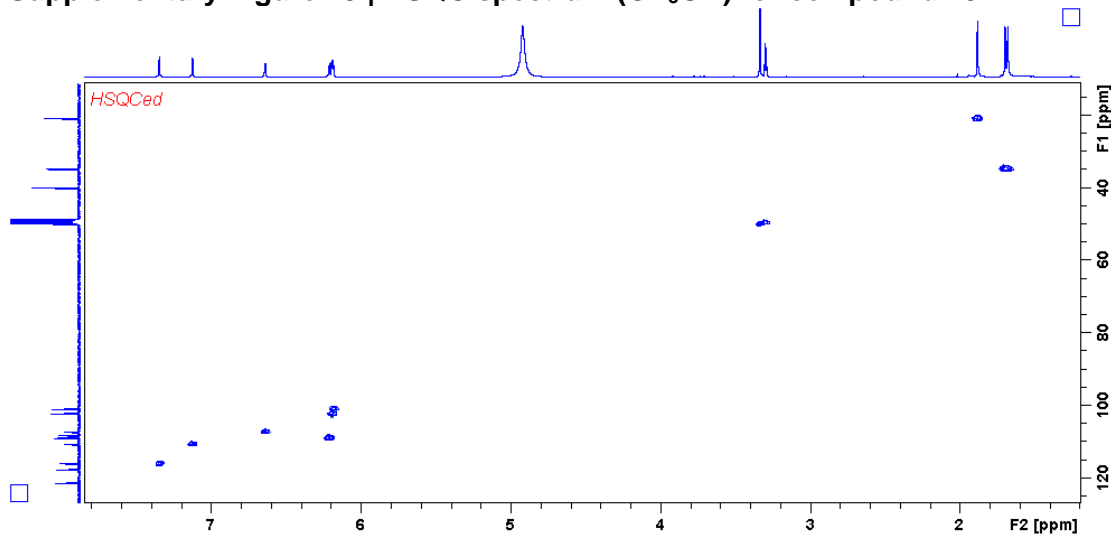

Supplementary Figure 50 | HMBC spectrum ( $\text{CD}_3\text{OD}$ ) for compound 13.

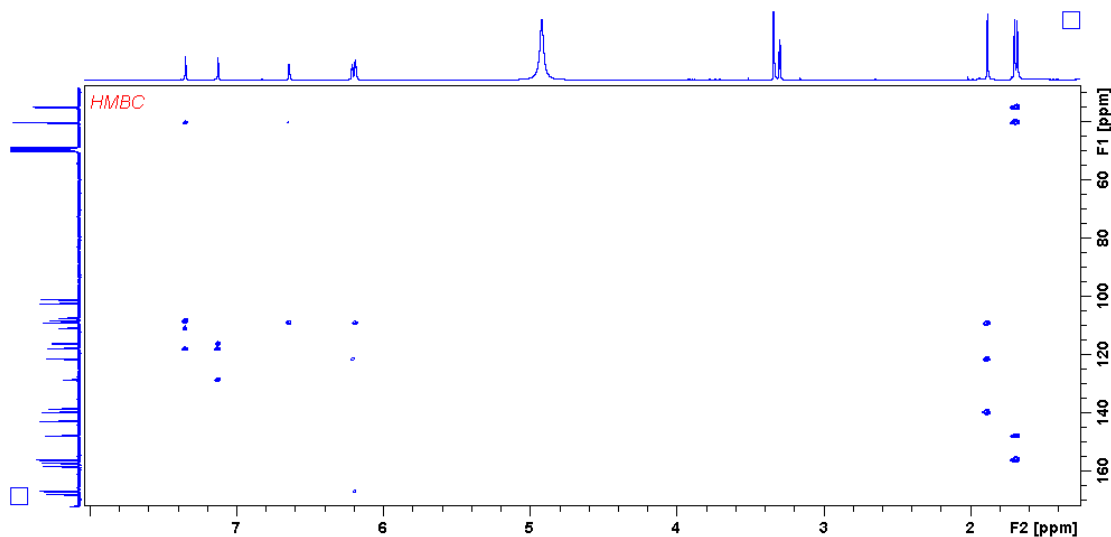

## Supplementary Figure 51 | NOESY spectrum (CD<sub>3</sub>OD) for compound 13.

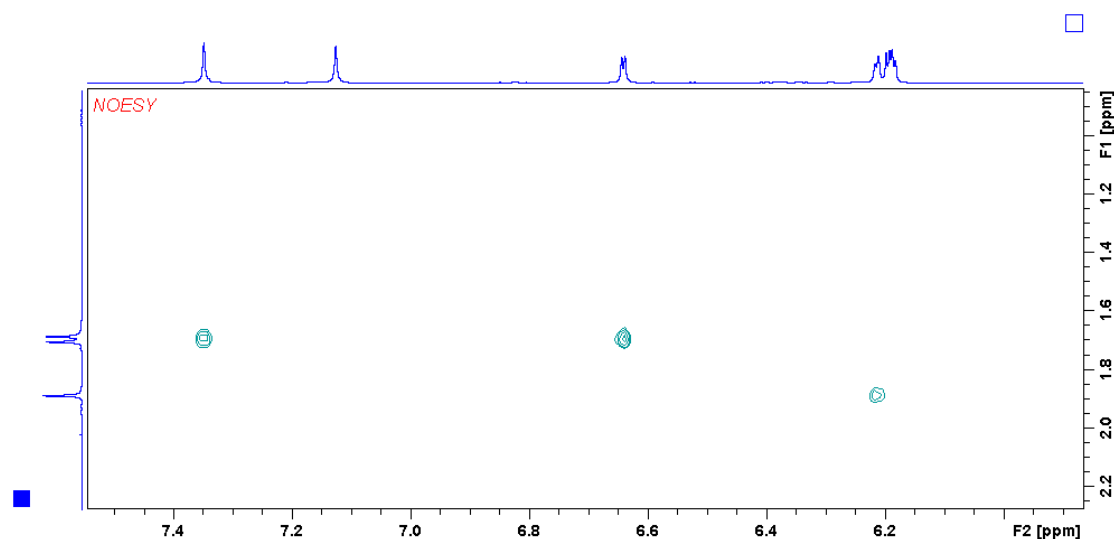

## References

- 1 MacNeil, D. J., Gewain, K. M., Ruby, C. L., Dezeny, G., Gibbons, P. H., MacNeil, T. Analysis of *Streptomyces avermitilis* genes required for avermectin biosynthesis utilizing a novel integration vector. *Gene*. **111**, 61-68 (1992).
- 2 Cobb, R. E., Wang, Y. & Zhao, H. High-efficiency multiplex genome editing of *Streptomyces* species using an engineered CRISPR/Cas system. *ACS Synth. Biol.* **4**, 723-728 (2015).
- 3 Kieser, T., Bibb, M. J., Buttner, M. J., Chater, K. F., Hopwood, D. A. *Practical Streptomyces Genetics* (The John Innes Foundation Press, Norwich, 2000).
- 4 Gregory, M. A., Till, R., Smith, M. C. M. Integration Site for *Streptomyces* Phage  $\phi$ BT1 and Development of Site-Specific Integrating Vectors. *J Bacteriol.* **185**, 5320-5323 (2003).
- 5 Hong, H. J., Hutchings, M. I., Hill, L. M., Buttner, M. J. The Role of the Novel Fem Protein VanK in Vancomycin Resistance in *Streptomyces coelicolor*. *J. Biol. Chem.* **280**, 13055-13061 (2005).
- 6 König, W. A., Krauss, C., Zahner, H. Metabolites from Microorganisms, 6-Chlorogenistein and 6,3'-Dichlorogenistein. *Helv. Chim. Acta.* **60**, 2071-2078 (1977).
